# Supplementary material for: The Fumagillin Gene Cluster, an Example of Hundreds of Genes under veA Control in Aspergillus fumigatus
Source: PLoS One. 2013 Oct 7;8(10):e77147. doi: 10.1371/journal.pone.0077147 (PMC3792039; doi:10.1371/journal.pone.0077147)
Supplement: Table S3 — (XLSX) [file pone.0077147.s006.xlsx]

## Sheet: RPKM values
Gene	WT RPKM	veARPKM	com RPKM	OEveA RPKM	veA vs WT p-value (Fisher's test, Bonferroni correction)	com vs WT p-value (Fisher's test, Bonferroni correction)	OEveA vs WT p-value (Fisher's test, Bonferroni correction)	veA vs WT differential expression	com vs WT differential expression	OEveA vs WT differential expression
Afu1g00100	2.37401	0.0759017	3.67823	0.0437582	0.0002872	935.07	3.37155e-12	Down	No	Down
Afu1g00110	3.49587	0.0958027	3.09509	0.883703	6.99975e-07	6816.36	0.00372754	Down	No	No
Afu1g00120	0.119045	0.0913468	0.092223	0.0263313	9784	9784	9784	No	No	No
Afu1g00130	0.0819033	0.0628466	0.0634494	0.0181159	9784	9784	9784	No	No	No
Afu1g00140	6.46605	6.26103	6.67889	4.1771	7936.56	7965.86	0.401608	No	No	No
Afu1g00150	242.944	79.0967	231.411	132.053	0	55.8312	2.0153e-305	No	No	No
Afu1g00160	0.479902	0.368242	0.495699	0.0353826	9784	9784	58.1341	No	No	No
Afu1g00170	0.83235	2.04379	1.67651	0.0368209	781.553	2304.46	1.9071	No	No	No
Afu1g00180	0.0839173	0.064392	0.0650097	0.0185614	9784	9784	9784	No	No	No
Afu1g00200	84.6231	9.01746	86.1099	0.522138	0	5884.58	0	Down	No	Down
Afu1g00210	0.0489852	0.0375877	0.0379482	0.0108349	9784	9784	9784	No	No	No
Afu1g00220	0.171346	0.0657391	0.154863	0.0126331	1853.4	9784	6.90665	No	No	No
Afu1g00230	0.0538837	0.0206732	0.041743	0.0774693	1844.35	9784	9784	No	No	No
Afu1g00240	0.413653	3.80888	1.12158	2.10437	0.95502	3083.34	77.0515	No	No	No
Afu1g00250	0.0269419	0.0206732	0.0208715	0.0238367	9784	9784	9784	No	No	No
Afu1g00270	0.119045	0.0913468	0.092223	0.0263313	9784	9784	9784	No	No	No
Afu1g00280	0.033294	0.0255474	0.0257925	0.00736419	9784	9784	9784	No	No	No
Afu1g00290	0.0739199	0.0567207	0.0572648	0.0163501	9784	9784	9784	No	No	No
Afu1g00300	0.0620479	0.285666	0.288407	0.343104	1445.55	1429.98	696.745	No	No	No
Afu1g00310	0.0475077	0.0364539	0.0368036	0.0105081	9784	9784	9784	No	No	No
Afu1g00320	0.0961306	0.0737636	0.0744712	0.0212628	9784	9784	9784	No	No	No
Afu1g00330	0.315013	0.241718	0.244036	0.0696765	9784	9784	9784	No	No	No
Afu1g00340	0.156304	0.119936	0.121087	0.0345723	9784	9784	9784	No	No	No
Afu1g00350	5.62246	22.9557	4.51817	51.48	5.05096e-62	750.208	4.8256e-303	Up	No	Up
Afu1g00390	0.0283599	0.0217613	0.02197	0.00627282	4247.95	4270.9	1772.1	No	No	No
Afu1g00400	0.12261	0.0940817	0.0949842	0.0271196	9784	9784	9784	No	No	No
Afu1g00410	11.2978	1.20148	17.4299	4.06542	4.81606e-98	5.78999e-11	7.53421e-57	Down	No	No
Afu1g00420	22.6452	7.44697	13.8869	14.2099	5.69632e-51	1.91492e-11	5.7395e-17	No	No	No
Afu1g00440	40.5509	0.860912	27.0684	1.76373	1.6455692689068e-315	1.88951e-14	0	Down	No	Down
Afu1g00450	291.222	5.10355	115.085	5.7374	0	0	0	Down	No	Down
Afu1g00460	39.2991	21.4334	33.848	16.2348	7.09177e-31	7.14622	1.94788e-94	No	No	No
Afu1g00470	25.1443	21.6192	26.9343	21.096	65.3614	1923.47	1.37393	No	No	No
Afu1g00480	443.999	18.3446	161.5	10.6506	0	0	0	Down	No	Down
Afu1g00490	0.0429262	0.0329385	0.0332544	0.00949471	9784	9784	9784	No	No	No
Afu1g00500	20.2736	11.7158	11.8282	6.98916	4.59455e-09	1.11918e-08	1.25215e-51	No	No	No
Afu1g00510	12.7091	12.6777	5.85266	8.11311	9510.53	5.19031e-16	1.46069e-08	No	No	No
Afu1g00520	0.433486	0.371757	0.533355	0.174842	7213.13	5341.33	40.1666	No	No	No
Afu1g00530	55.9537	64.8689	58.1096	12.4883	71.2695	5076.66	2.38735e-122	No	No	Down
Afu1g00540	87.3382	82.1467	79.4685	89.4221	74.3933	0.456271	2075.76	No	No	No
Afu1g00550	12.2509	11.9249	20.1549	29.6538	7339.45	1.72783e-08	3.72825e-54	No	No	No
Afu1g00560	243.857	82.7869	313.972	219.083	0	3.14601e-43	1.02014e-07	No	No	No
Afu1g00570	36.4294	40.8696	45.6894	84.2723	320.173	0.168487	7.01606e-100	No	No	No
Afu1g00580	11.7446	6.90719	11.7322	14.638	8.81613e-06	9784	3.26511	No	No	No
Afu1g00590	9.87314	5.90897	11.0145	11.1987	3.99725e-13	379.671	40.2432	No	No	No
Afu1g00610	16.7807	15.6856	21.1673	16.2263	2672.06	0.432267	4859.27	No	No	No
Afu1g00620	1.03863	1.44213	1.5326	1.18147	2345.68	1537.68	6346.7	No	No	No
Afu1g00630	0.0203537	0.0156179	0.0157678	0.00450196	9784	9784	9784	No	No	No
Afu1g00640	0.05534	0.0424639	0.0428712	0.0122405	9784	9784	9784	No	No	No
Afu1g00650	0.044707	0.0343049	0.034634	0.049443	4247.95	9784	9784	No	No	No
Afu1g00660	0.0511895	0.0392791	0.0396559	0.0226449	9784	9784	9784	No	No	No
Afu1g00670	0.284386	0.218217	0.220311	0.0629024	9784	9784	9784	No	No	No
Afu1g00680	0.0703636	0.0539919	0.0545098	0.0155635	9784	9784	9784	No	No	No
Afu1g00690	0.186144	0.142833	0.144203	0.0411725	9784	9784	9784	No	No	No
Afu1g00700	0.0150226	0.0115273	0.0116378	0.0033228	9784	9784	9784	No	No	No
Afu1g00710	0.113126	0.173609	0.0876373	0.100088	9784	4270.9	9784	No	No	No
Afu1g00720	0.106092	0.0814075	0.0821884	0.0234662	9784	9784	9784	No	No	No
Afu1g00730	0.0373646	0.0286709	0.0289459	0.00826455	9784	9784	9784	No	No	No
Afu1g00740	0.060223	0.0462107	0.046654	0.0133205	9784	9784	9784	No	No	No
Afu1g00750	119.892	157.962	128.223	116.3	1.56732e-31	39.739	1200.19	No	No	No
Afu1g00760	36.65	2327.44	150.226	509.757	0	1.6071e-100	0	Up	Up	Up
Afu1g00770	3.72288	305.075	23.2422	34.0521	0	1.36304e-31	5.32029e-75	Up	Up	Up
Afu1g00780	0.0947955	0.0727391	0.0734368	0.0209675	9784	9784	9784	No	No	No
Afu1g00790	0.0144501	0.011088	0.0111943	0.00958852	9784	9784	9784	No	No	No
Afu1g00800	0.0519691	0.0398773	0.0402598	0.0114949	9784	9784	9784	No	No	No
Afu1g00810	0.916828	6.15568	1.83483	10.6803	5.79714e-11	438.063	2.97307e-35	Up	No	Up
Afu1g00820	0.105545	0.0809879	0.0817647	0.0233452	9784	9784	9784	No	No	No
Afu1g00830	0.176516	0.135445	0.136744	0.0390429	9784	9784	9784	No	No	No
Afu1g00840	0.0323473	0.0248209	0.025059	0.00715478	4247.95	4270.9	3223.23	No	No	No
Afu1g00850	0.107203	0.0822599	0.083049	0.0237119	9784	9784	9784	No	No	No
Afu1g00880	0.0181846	0.027907	0.0845241	0.0603327	9784	1429.98	3270.08	No	No	No
Afu1g00890	0.0227762	0.0174768	0.0176444	0.00503779	9784	9784	9784	No	No	No
Afu1g00910	1.96883	0.402863	1.18629	0.532251	0.000557695	238.121	5.57308e-06	Down	No	No
Afu1g00920	30.065	33.068	40.6391	34.9842	908.529	0.000213165	11.7969	No	No	No
Afu1g00930	0.0593502	0.045541	0.0459779	0.0131275	9784	9784	9784	No	No	No
Afu1g00940	0.173035	0.0442581	0.0893654	0.0637884	800.767	6448.5	1595.68	No	No	No
Afu1g00950	0.502474	0.819319	0.875836	1.31979	3076.37	2309.98	44.4345	No	No	No
Afu1g00960	5.56408	7.33129	7.61098	10.686	0.359732	0.0245641	3.34886e-32	No	No	No
Afu1g00970	0.0470708	0.0361187	0.0364652	0.0104114	9784	9784	9784	No	No	No
Afu1g00980	0.0411988	0.031613	0.0319162	0.00911263	9784	9784	9784	No	No	No
Afu1g00990	0.078152	0.0599681	0.0605434	0.0172862	9784	9784	9784	No	No	No
Afu1g01000	0.0530462	0.0407037	0.0410942	0.0234662	9784	9784	9784	No	No	No
Afu1g01010	0.00975503	0.0074853	0.0075571	0.00215768	9784	9784	9784	No	No	No
Afu1g01020	0.0268359	0.010296	0.0103947	0.00296787	5703.93	1864.33	846.631	No	No	No
Afu1g01030	0.0142292	0.0109184	0.0110232	0.00314731	9784	9784	9784	No	No	No
Afu1g01040	0.0645925	0.0495635	0.050039	0.014287	9784	9784	9784	No	No	No
Afu1g01050	0.0689421	0.0529012	0.0534086	0.0762454	9784	9784	5799.86	No	No	No
Afu1g01070	0.146256	0.112226	0.113303	0.0323498	9784	9784	9784	No	No	No
Afu1g01080	0.13296	0.102024	0.103002	0.0294089	9784	9784	9784	No	No	No
Afu1g01090	0.0664799	0.0510118	0.0515012	0.0147045	9784	9784	9784	No	No	No
Afu1g01100	0.0849619	0.521548	0.658189	0.507396	856.097	284.025	464.202	No	No	No
Afu1g01110	0.0970418	0.223388	0.150354	0.0214643	6241.08	9784	3223.23	No	No	No
Afu1g01120	0.261393	0.0668581	1.21499	0.539623	3162.93	68.7326	3403.3	No	No	No
Afu1g01130	0.393766	1.32945	1.28119	2.26449	101.683	156.05	0.00843676	No	No	Up
Afu1g01140	10.1165	13.1655	12.414	21.8393	204.208	713.474	1.30271e-15	No	No	No
Afu1g01160	4.84862	12.125	4.43173	4.27437	5.5974e-20	4419.22	1791.28	No	No	No
Afu1g01170	0.0694096	0.0532598	0.107541	0.0614098	9784	4970.86	9784	No	No	No
Afu1g01175	12.3807	1.58334	13.1572	8.35578	1.01424e-12	6959.46	33.2624	Down	No	No
Afu1g01180	0.290437	0.306433	0.365622	0.273023	9784	6512.01	8235.18	No	No	No
Afu1g01190	0.0541688	0.290956	0.377675	0.25161	1462.51	494.638	1565.38	No	No	No
Afu1g01200	0.0503091	0.0386035	0.0389739	0.0111277	9784	9784	9784	No	No	No
Afu1g01210	1.34709	0.103366	2.08715	0.148979	15.5064	2694.76	0.45557	No	No	No
Afu1g01220	2.9178	0.196396	3.88628	0.611412	1.3267e-11	872.552	2.41562e-11	Down	No	Down
Afu1g01230	3.54093	2.68752	3.10091	5.68676	612.492	3791.79	0.0872775	No	No	No
Afu1g01240	13.0461	7.53695	9.93105	7.50373	1.99987e-12	0.134638	1.38554e-20	No	No	No
Afu1g01250	7.66028	2.84147	7.25619	4.20777	1.31725e-13	5640.5	2.44627e-08	No	No	No
Afu1g01260	0.271975	0.0298134	0.150497	0.171878	243.957	3779.53	3076.61	No	No	No
Afu1g01265	0.87933	0.0963904	1.16778	5.14025	243.957	6332.87	2.519e-05	No	No	Up
Afu1g01270	0.186144	0.0285666	0.173044	0.0576415	899.089	9784	490.202	No	No	No
Afu1g01280	0.240186	0.0460752	0.32562	0.0132815	1702.02	7490.76	45.0184	No	No	No
Afu1g01290	0.0613048	0.0470408	0.0949842	0.0406794	9784	4970.86	9784	No	No	No
Afu1g01300	17.5507	2.91394	9.62078	5.85702	1.60935e-55	4.94936e-09	4.695e-46	Down	No	No
Afu1g01310	0.290143	0.0954148	0.35321	0.165023	1114.7	7962.66	1923.42	No	No	No
Afu1g01320	0.0418728	0.0321301	0.19463	0.0833554	4247.95	1429.98	9784	No	No	No
Afu1g01330	6.93809	12.4654	8.97993	3.6681	0.0558977	645.686	0.0350002	No	No	No
Afu1g01340	7.49415	33.2773	5.32975	6.2047	1.01496e-100	14.4387	240.598	Up	No	No
Afu1g01350	19.8823	51.6131	15.326	11.3334	2.27086e-33	99.3596	8.82417e-07	No	No	No
Afu1g01360	60.5813	36.3575	61.2208	21.4846	1.01035e-15	8244.33	6.39714e-90	No	No	No
Afu1g01370	74.374	23.7436	70.0647	11.1904	3.33908e-73	2112.62	2.97258e-248	No	No	Down
Afu1g01380	46.1209	31.4233	56.2724	39.5877	5.71162e-08	0.444398	4.19688	No	No	No
Afu1g01390	19.3872	13.8024	21.2837	18.7695	0.0514743	1656.65	5505.12	No	No	No
Afu1g01400	12.53	13.3666	19.1769	15.2092	8205.15	275.589	2937.57	No	No	No
Afu1g01410	6.44094	3.47792	8.10058	4.485	0.00380051	210.742	1.0745	No	No	No
Afu1g01420	0.0411161	0.063099	0.0318521	0.027283	9784	9784	5384.6	No	No	No
Afu1g01430	1.50281	3.19999	3.55084	3.34895	0.232056	0.00665256	0.00122197	No	No	No
Afu1g01440	0.945038	7.97668	2.44036	1.25418	0.0541583	1639.85	9784	No	No	No
Afu1g01450	5.96807	22.9345	7.55529	5.06558	3.1507e-50	426.545	1077.65	No	No	No
Afu1g01460	1.45164	3.45891	2.4267	0.388681	5.46082	668.84	0.467205	No	No	No
Afu1g01480	0.0787531	0.0302147	0.0610091	0.0522574	1844.35	9784	6283.65	No	No	No
Afu1g01490	17.721	2.13748	8.75137	1.34596	0	6.50354e-73	0	Down	No	Down
Afu1g01500	0.650026	0.748173	1.42677	1.29399	9784	946.075	1268.41	No	No	No
Afu1g01520	0.339378	0.607633	0.438187	0.12511	5181.76	9784	1595.68	No	No	No
Afu1g01530	51.242	99.4265	72.072	47.2175	4.89439e-34	8.52824e-06	1064.79	No	No	No
Afu1g01540	35.7396	33.2801	17.4125	32.166	1456.28	2.40005e-32	96.4164	No	No	No
Afu1g01550	376.698	739.844	154.129	2760.06	0	0	0	No	No	Up
Afu1g01560	19.6584	23.3009	19.6617	26.7038	35.0443	9784	1.22016e-06	No	No	No
Afu1g01570	9.28685	7.25483	10.7916	9.36731	233.812	1348.07	9450.47	No	No	No
Afu1g01580	8.26908	6.94938	4.57568	8.18699	6347	902.771	9784	No	No	No
Afu1g01590	14.1061	13.6704	14.7658	12.3616	5645.55	4031.43	48.0893	No	No	No
Afu1g01600	31.08	8.56512	14.4302	7.3374	3.10585e-96	2.1307e-42	5.86712e-188	No	No	Down
Afu1g01610	20.2941	5.29919	15.2992	10.7865	8.67578e-37	2.9671	1.75975e-16	No	No	No
Afu1g01620	2.67537	6.28059	3.38589	11.6886	3.43131e-11	623.77	4.64382e-70	No	No	Up
Afu1g01630	146.573	36.7914	76.3156	36.647	5.85721679243568e-311	2.47423e-96	0	No	No	No
Afu1g01640	73.856	130.359	70.3416	46.1995	4.60693e-84	1406.46	6.74895e-52	No	No	No
Afu1g01650	2.52849	3.42384	3.34147	6.82088	873.691	1198.37	6.47516e-11	No	No	No
Afu1g01660	4.96017	5.45382	4.77979	5.04409	3557.22	7363.13	8783.07	No	No	No
Afu1g01670	5.69991	4.74377	5.16291	5.92549	1382.27	4257.73	7224.91	No	No	No
Afu1g01680	235.149	134.541	175.655	138.61	3.8419e-126	1.89292e-37	7.35816e-175	No	No	No
Afu1g01690	132.235	125.877	156.49	21.6561	342.948	3.55574e-10	0	No	No	Down
Afu1g01700	14.0294	7.59271	20.9019	2.5657	1.70695e-22	1.37128e-14	8.7878e-190	No	No	Down
Afu1g01710	0.401487	0.308071	0.311027	0.0888034	9784	4270.9	1772.1	No	No	No
Afu1g01720	59.0392	82.2234	66.2519	76.0915	4.33727e-51	0.0025956	1.67658e-40	No	No	No
Afu1g01730	21.7276	21.5435	21.3692	22.8426	8842.58	7678.25	3189.96	No	No	No
Afu1g01740	141.676	296.454	142.016	181.832	0	9014.35	5.80244e-43	No	No	No
Afu1g01750	14.1605	15.6367	12.937	16.7911	1117.98	1654.47	9.18835	No	No	No
Afu1g01760	120.911	38.5601	102.541	172.132	5.13095e-160	0.00691677	2.1831e-42	No	No	No
Afu1g01770	265.898	89.0878	71.8537	46.7835	0	0	0	No	No	Down
Afu1g01780	19.5778	15.2982	20.9643	21.0425	16.2742	3404.47	2419.67	No	No	No
Afu1g01790	54.5099	55.1323	73.0955	71.8108	8303.84	9.80013e-05	1.66921e-06	No	No	No
Afu1g01812	133.453	2.14808	160.854	10.9155	0	2.47104e-13	0	Down	No	Down
Afu1g01820	5.14299	0.811399	4.9151	0.9143	2.81343e-16	7285.14	3.77372e-27	Down	No	Down
Afu1g01830	12.0483	17.4361	11.4132	12.3442	0.26379	5796.84	7659.97	No	No	No
Afu1g01850	30.0556	23.0063	23.4347	10.0123	3.61822e-07	6.69999e-06	8.43441e-172	No	No	No
Afu1g01860	47.8322	45.3539	44.055	27.1372	3463.46	1447.89	2.30281e-24	No	No	No
Afu1g01870	122.442	146.41	134.318	102.815	0.000682623	62.1869	3.91331e-05	No	No	No
Afu1g01890	31.0377	2.73462	43.4207	4.55764	3.65698e-108	2.57865e-05	1.99221e-148	Down	No	Down
Afu1g01900	40.0471	41.2667	33.381	16.2607	6191.32	38.1679	9.60192e-48	No	No	No
Afu1g01910	27.3331	56.481	36.6655	60.1389	3.57621e-50	0.000176281	1.12597e-84	No	No	No
Afu1g01920	109.845	41.102	98.6796	61.4414	2.74763e-142	5.35276	3.06965e-91	No	No	No
Afu1g01930	12.8169	5.15726	8.11281	8.93695	2.3181e-19	0.000269964	0.000364405	No	No	No
Afu1g01940	43.7459	29.9119	27.2534	5.60296	6.91224e-12	1.27599e-18	0	No	No	Down
Afu1g01950	51.8721	62.2647	62.3919	45.3904	84.9403	75.917	288.66	No	No	No
Afu1g01960	29.7029	7.39839	59.1124	20.4778	4.63752e-68	4.0513e-44	6.01788e-10	Down	No	No
Afu1g01970	29.1365	101.4	31.5026	35.8893	4.46157e-175	1797.87	0.10211	No	No	No
Afu1g01980	4.25181	7.04019	2.51371	6.01389	95.3985	351.159	432.213	No	No	No
Afu1g01990	19.8409	84.7698	21.6109	20.828	2.06878e-259	1430.35	3254.44	Up	No	No
Afu1g02000	15.1619	7.91193	22.1695	13.3443	1.94695e-21	7.29811e-11	46.5107	No	No	No
Afu1g02010	48.4257	80.4898	41.1336	43.8662	1.53837e-73	0.00368665	1.44166	No	No	No
Afu1g02020	45.9089	31.9194	51.3718	73.2741	2.58709e-06	294.563	9.80466e-28	No	No	No
Afu1g02030	90.2483	299.899	77.8133	142.941	0	8.49527e-06	8.77512e-146	No	No	No
Afu1g02040	30.3634	10.9324	26.2965	10.7628	1.52711e-28	409.278	5.25212e-48	No	No	No
Afu1g02050	29.7557	43.114	36.1419	69.8443	8.55002e-24	0.000436521	3.89414e-234	No	No	No
Afu1g02060	10.6869	6.85662	10.888	9.39564	0.0409218	8449.62	745.703	No	No	No
Afu1g02070	96.4923	99.2288	152.08	142.578	4060.64	1.81959e-45	1.17384e-45	No	No	No
Afu1g02080	44.5743	36.8619	65.6864	53.349	0.715551	1.52843e-16	0.00964217	No	No	No
Afu1g02090	118.484	38.7738	113.124	31.2658	4.21096e-176	1265.03	0	No	No	No
Afu1g02100	12.8613	6.05199	10.2934	4.34435	1.41251e-34	0.131855	2.48713e-102	No	No	No
Afu1g02110	261.46	964.453	227.585	165.938	0	2.81847e-08	1.35898e-146	No	No	No
Afu1g02120	22.2375	5.03039	25.7959	18.8186	6.87502e-101	13.615	0.46106	Down	No	No
Afu1g02130	30.9097	33.3966	44.7979	62.138	361.455	3.39009e-23	4.27041e-143	No	No	No
Afu1g02140	38.0447	12.0492	32.9736	44.6243	2.48008e-279	0.00013914	3.65438e-12	No	No	No
Afu1g02150	73.2404	90.9765	75.7123	100.979	1.4008e-09	2780.17	1.28313e-36	No	No	No
Afu1g02160	35.8764	118.374	46.8414	44.2059	1.3498e-125	0.174952	0.748844	No	No	No
Afu1g02170	74.6935	37.0539	69.1837	39.1519	9.63049e-99	63.8277	7.19177e-133	No	No	No
Afu1g02180	11.5762	10.975	11.7931	16.3213	2983.41	7087.43	2.29681e-14	No	No	No
Afu1g02190	293.843	339.923	267.33	363.477	4.51744e-06	1.33095	2.49998e-24	No	No	No
Afu1g02200	135.266	154	140.502	85.3041	0.0101139	1593.05	8.31679e-73	No	No	No
Afu1g02210	65.8438	208.08	77.9788	59.8281	0	0.0750757	38.5603	No	No	No
Afu1g02220	12.7974	9.21548	10.8291	7.75152	704.807	3349.95	8.04219	No	No	No
Afu1g02230	1.66366	1.27657	1.09054	1.89651	5432.38	3042.69	7554.55	No	No	No
Afu1g02240	0.0809321	0.124203	0.250788	0.411725	9784	3864.55	1045.49	No	No	No
Afu1g02250	0.0930719	0.142833	0.144203	0.0411725	4976.79	4970.86	9784	No	No	No
Afu1g02255	1.84174	0.0831304	3.0214	0.383405	0.0719244	952.441	0.140259	No	No	No
Afu1g02260	0.521677	0.100074	0.909307	0.548093	1702.02	4037.48	9784	No	No	No
Afu1g02270	47.0341	17.3411	70.2331	58.8245	2.29783e-134	1.06385e-40	3.68412e-15	No	No	No
Afu1g02280	45.7148	23.7792	42.5921	25.3494	1.8758e-58	374.588	1.50319e-75	No	No	No
Afu1g02290	1037.19	423.774	4062.25	5404.63	0	0	0	No	No	Up
Afu1g02300	1.30301	0.714166	0.86522	1.11166	3768.56	5660.53	6442.47	No	No	No
Afu1g02310	13.1371	4.93596	17.968	10.3405	2.65664e-08	24.3804	129.367	No	No	No
Afu1g02320	35.9662	7.92413	37.2421	23.7476	5.23492e-53	5868.25	2.89442e-08	Down	No	No
Afu1g02330	33.7683	13.239	39.4219	60.6883	1.51548e-32	68.3819	9.77615e-37	No	No	No
Afu1g02340	27.2858	31.847	45.0562	108.268	33.9104	5.59656e-21	0	No	No	No
Afu1g02350	7.41102	6.09706	7.78321	5.71192	545.447	6234.99	17.1666	No	No	No
Afu1g02360	20.1346	7.44121	16.9419	14.9897	1.49236e-51	9.24326	1.85763e-07	No	No	No
Afu1g02370	8.30101	4.29947	10.2355	6.34975	0.0429869	746.476	111.867	No	No	No
Afu1g02380	17.2066	6.4695	22.1273	13.7011	6.45502e-05	469.045	447.563	No	No	No
Afu1g02390	21.4976	17.4607	24.4481	11.8484	5.28332	206.854	2.75777e-25	No	No	No
Afu1g02400	35.8678	46.1282	43.685	48.3626	3.8106e-11	1.32043e-05	3.38812e-25	No	No	No
Afu1g02410	112.094	144.179	137.463	123.728	2.1752e-20	3.7211e-12	0.0388654	No	No	No
Afu1g02420	35.3837	45.6878	38.2297	37.1654	0.000109311	972.455	2122.8	No	No	No
Afu1g02430	115.09	84.1491	97.5638	82.7332	3.09614e-20	0.000289257	8.44821e-35	No	No	No
Afu1g02440	13.6268	12.0438	9.94852	9.29466	2092.12	27.4016	0.0918964	No	No	No
Afu1g02450	12.4106	13.0975	11.338	10.6573	4365.16	2143.49	114.742	No	No	No
Afu1g02460	15.516	38.1219	14.785	17.9417	1.31028e-139	2710.61	0.396971	No	No	No
Afu1g02480	2.64479	3.46965	5.66749	5.93013	174.418	2.28618e-10	1.35368e-17	No	No	No
Afu1g02490	33.6294	35.7297	37.7368	45.8716	1984.38	142.412	1.42824e-12	No	No	No
Afu1g02500	24.367	16.1465	22.5351	18.0825	1.03696e-08	1446.12	9.10345e-07	No	No	No
Afu1g02510	56.6049	46.8574	58.5304	51.5388	5.74401e-09	1794.66	0.0947575	No	No	No
Afu1g02520	5.60647	1.3093	5.47629	2.48015	2.96876	9784	24.3904	No	No	No
Afu1g02530	25.5241	47.2589	45.9915	21.6623	2.10793e-37	2.30019e-33	2.90475	No	No	No
Afu1g02540	52.45	30.5996	49.5147	63.7726	4.76443e-87	151.955	1.77045e-21	No	No	No
Afu1g02550	260.029	207.541	308.274	803.888	6.66867e-30	9.37241e-20	0	No	No	No
Afu1g02560	25.7157	10.9487	50.6471	28.1367	1.0109e-16	1.29741e-22	1491.03	No	No	No
Afu1g02570	50.5848	58.9352	45.4788	54.7203	8.40658e-05	1.68347	4.86111	No	No	No
Afu1g02580	19.8736	15.6654	34.6173	38.1766	22.7443	7.14269e-14	2.46773e-30	No	No	No
Afu1g02590	25.6378	102.412	41.6109	42.8477	0	3.54965e-30	2.21858e-49	No	No	No
Afu1g02600	327.289	72.8449	254.55	337.203	0	1.38402e-25	841.519	Down	No	No
Afu1g02610	164.246	105.258	134.003	59.224	2.05484e-49	1.01196e-09	0	No	No	No
Afu1g02620	42.0017	17.6252	74.126	27.3771	2.44013e-17	3.07244e-14	1.71932e-06	No	No	No
Afu1g02630	67.9133	152.255	60.8787	57	1.18675e-210	7.05518	7.80765e-07	No	No	No
Afu1g02640	46.7631	48.4269	48.7652	52.9542	4361.1	3500.38	7.5314	No	No	No
Afu1g02650	20.079	5.63305	18.5676	9.62846	1.25779e-52	1993.28	1.54851e-34	No	No	No
Afu1g02660	1.88156	4.67103	4.15851	1.62798	0.0116287	0.414502	4140.97	No	No	No
Afu1g02670	238.821	212.181	317.099	401.795	0.00120904	3.76841e-40	3.70631e-220	No	No	No
Afu1g02680	11.914	67.0899	14.7211	17.0864	0	0.85092	1.50061e-12	Up	No	No
Afu1g02700	90.8337	60.4236	62.3792	29.2474	7.93749e-29	2.14311e-24	5.53062e-270	No	No	No
Afu1g02710	62.7017	74.4449	62.5304	51.6847	0.00383738	9233.44	1.97579e-06	No	No	No
Afu1g02720	16.2893	33.0003	18.7518	37.6966	3.95596e-16	1131.18	1.88768e-35	No	No	No
Afu1g02730	19.4325	17.4629	26.673	32.0634	1738.34	0.109379	6.81096e-14	No	No	No
Afu1g02740	0.568773	0.0793517	1.00141	0.343104	34.6326	1284.07	1518.82	No	No	No
Afu1g02750	0.115683	0.0887663	0.179236	0.460574	4247.95	9784	2254.58	No	No	No
Afu1g02760	32.8911	22.3533	44.2973	63.3339	2.55051e-16	5.8915e-13	6.95939e-119	No	No	No
Afu1g02770	85.513	4.63231	155.827	32.8867	0	1.01778e-78	1.77503e-152	Down	No	No
Afu1g02780	9.48354	23.3607	8.4321	19.3792	8.96772e-25	2489.78	4.94137e-19	No	No	No
Afu1g02800	85.1508	86.4563	77.265	55.4556	6474.47	49.8485	7.63422e-41	No	No	No
Afu1g02810	33.8855	45.533	29.4853	37.5816	0.00979509	390.125	520.673	No	No	No
Afu1g02820	2146.35	157.964	1041.08	272.072	0	0	0	Down	No	Down
Afu1g02830	59.7969	55.2915	50.3806	80.9875	114.661	0.00069745	4.57987e-33	No	No	No
Afu1g02840	28.996	11.4305	27.8709	31.1922	5.39867e-70	3328.77	299.146	No	No	No
Afu1g02850	93.8347	23.2131	112.766	57.6508	3.66184e-148	0.00483615	1.48739e-40	Down	No	No
Afu1g02860	2.01035	6.85599	3.92233	4.84189	1.71526e-06	25.4622	0.0135518	No	No	No
Afu1g02870	40.7489	114.088	59.743	97.3326	6.81757e-213	1.92059e-19	3.995e-191	No	No	No
Afu1g02880	43.4761	13.258	71.75	38.4405	4.29207e-74	4.53802e-28	24.2499	No	No	No
Afu1g02890	155.159	61.0939	210.445	138.287	3.12527e-128	7.64493e-23	0.084785	No	No	No
Afu1g02900	31.488	31.1592	32.7911	21.9471	8457.87	4719.64	8.88833e-09	No	No	No
Afu1g02910	94.2719	52.319	116.27	129.053	2.76338e-56	1.77226e-08	6.68642e-34	No	No	No
Afu1g02920	14.939	13.407	13.657	21.7495	574.861	1138.72	2.43134e-14	No	No	No
Afu1g02930	55.3122	25.3073	72.871	53.1015	1.78406e-39	3.81682e-06	2876.46	No	No	No
Afu1g02940	22.5829	23.9717	19.6239	25.5527	3102.91	242.292	119.094	No	No	No
Afu1g02950	250.372	119.829	226.765	38.7833	1.07533e-242	0.00159555	0	No	No	Down
Afu1g02960	134.841	30.6569	107.748	15.3543	1.25649e-69	2.22297	2.4207e-195	Down	No	Down
Afu1g02970	100.418	43.0969	103.698	61.5644	2.79295e-121	2615.2	6.13545e-72	No	No	No
Afu1g02980	139.867	296.808	120.28	308.09	1.61901e-179	0.0336522	1.367e-275	No	No	No
Afu1g02985	15.1299	18.0594	14.7684	17.5507	34.5922	6893	34.795	No	No	No
Afu1g02990	54.8029	33.6358	52.7473	51.2598	1.12951e-67	1189.62	10.3538	No	No	No
Afu1g03000	15.999	54.7092	19.1599	24.6821	1.66775e-144	32.4948	5.54413e-15	No	No	No
Afu1g03010	25.9314	38.1212	24.8906	23.5229	2.40996e-22	3067.01	37.6726	No	No	No
Afu1g03020	78.32	90.3419	83.6739	99.6375	522.614	3817.92	0.694197	No	No	No
Afu1g03030	72.2023	79.581	67.5513	61.8823	0.029649	21.3313	2.61227e-13	No	No	No
Afu1g03035	27.0214	14.3594	25.0937	18.7099	2.45917e-09	3361.02	0.000252025	No	No	No
Afu1g03040	376.733	130.759	427.504	752.379	1.13286e-277	0.000140954	0	No	No	No
Afu1g03050	24.322	23.8954	25.8951	21.4119	6175.88	839.398	0.460665	No	No	No
Afu1g03060	113.156	123.066	137.114	206.833	64.1749	1.87478e-06	2.88936e-145	No	No	No
Afu1g03070	40.6772	91.1949	41.1656	48.1674	5.58666e-173	7271.25	1.19663e-05	No	No	No
Afu1g03080	11.4295	15.1892	15.1465	30.0569	5.11445	5.70084	7.98026e-56	No	No	No
Afu1g03090	78.1804	54.3063	40.3769	29.4641	1.64086e-25	1.40297e-76	1.43813e-232	No	No	No
Afu1g03100	206.732	200.371	249.307	257.742	3347.07	1.8076e-05	1.48879e-13	No	No	No
Afu1g03110	944.99	2643.13	1072.87	1247.18	0	0.000610556	1.6284e-44	No	No	No
Afu1g03120	41.2447	26.9893	39.3153	21.4223	1.66766e-15	2577.72	2.00276e-56	No	No	No
Afu1g03130	30.4776	35.87	27.2686	21.6669	7.12231	297.289	1.25247e-10	No	No	No
Afu1g03140	18.6627	2.90246	20.2699	10.2611	8.81138e-103	1263.14	5.64699e-28	Down	No	No
Afu1g03150	8.49398	1.92066	17.42	3.9118	2.22327e-25	4.02052e-16	3.06024e-14	Down	No	No
Afu1g03160	54.9422	1.00644	51.7644	1.01539	2.65978e-238	2220.27	0	Down	No	Down
Afu1g03170	9.66854	2.17622	6.67451	4.01572	3.55398e-58	0.000763365	4.75872e-42	Down	No	No
Afu1g03180	63.2475	48.5315	30.9022	7.04507	1.35071	2.86928e-16	3.48648e-152	No	No	Down
Afu1g03190	4.6273	0.887663	5.28745	0.255874	0.00170414	5326.17	3.0001e-17	Down	No	Down
Afu1g03200	0.0394524	0.363275	1.00859	1.98961	94.106	0.00170927	1.07282e-14	No	Up	Up
Afu1g03210	33.9314	34.2165	17.7256	2.02726	8879.77	1.59632e-17	1.0402e-248	No	No	Down
Afu1g03220	1.1634	0.535624	1.44203	0.102931	2993.85	7688.89	28.8979	No	No	No
Afu1g03230	9.36037	0.56113	10.7637	0.323498	4.37658e-14	4150.19	3.19292e-33	Down	No	Down
Afu1g03240	4.69937	0.257568	3.64054	0.0742455	0.738316	5568.22	4.00051e-07	No	No	Down
Afu1g03250	1.37524	0.293128	1.9532	0.0337983	10.4582	2543.03	5.61432e-08	No	No	Down
Afu1g03260	0.0463254	0.0355467	0.0717754	0.0204931	9784	4970.86	9784	No	No	No
Afu1g03270	0.715938	0.109872	0.443702	0.126685	899.089	5053.13	125.577	No	No	No
Afu1g03280	1.13093	0.27404	0.415004	1.36923	17.4249	120.828	4741.27	No	No	No
Afu1g03290	1.40006	0.671438	0.542303	1.00644	2574.26	1424.79	3698.02	No	No	No
Afu1g03300	0.929155	0.633747	0.746464	1.29399	1989.4	4094.62	1133.86	No	No	No
Afu1g03310	0.2767	0.21232	0.214356	0.0612024	4247.95	4270.9	1772.1	No	No	No
Afu1g03320	3.81231	0.566185	2.61991	0.408016	1.13597e-08	487.848	4.00449e-21	Down	No	Down
Afu1g03352	0.020233	9.1289	1.22259	0.129783	1.03984e-139	1.93385e-14	309.588	Up	Up	No
Afu1g03360	3.88967	11.4881	6.5951	2.35377	2.22549e-10	13.7166	29.0261	No	No	No
Afu1g03370	68.5032	89.2008	64.0073	45.546	4.52888e-19	190.421	2.26839e-53	No	No	No
Afu1g03380	54.82	48.4781	44.4547	71.8747	2.14483e-05	1.91716e-19	1.2347e-62	No	No	No
Afu1g03390	561.358	1682.09	449.115	845.936	0	9.55859e-23	1.86435e-158	No	No	No
Afu1g03400	72.7822	139.221	77.6638	86.974	2.93816e-191	94.6431	2.62061e-14	No	No	No
Afu1g03410	48.063	28.5068	41.0015	38.3923	1.35825e-28	0.810268	2.48337e-07	No	No	No
Afu1g03420	67.372	57.4615	89.3537	80.6815	10.0749	1.01928e-06	0.0146293	No	No	No
Afu1g03430	36.4704	41.0513	40.7508	48.2328	354.404	485.762	9.22462e-06	No	No	No
Afu1g03440	59.4774	51.1564	74.7325	91.3209	6.22873	0.000161185	9.76594e-36	No	No	No
Afu1g03450	34.5846	21.6521	36.5638	33.842	9.54334e-29	1087.96	4516.93	No	No	No
Afu1g03460	66.6677	61.469	64.314	66.3892	258.883	3199.3	8622.7	No	No	No
Afu1g03470	2.73011	2.39416	2.11498	1.72532	7016.16	5568.22	1518.91	No	No	No
Afu1g03480	4.36817	3.28199	2.81997	2.43558	1747.21	405.351	9.11106	No	No	No
Afu1g03490	38.1595	37.5147	40.5042	66.5784	7262.4	2288.32	7.3344e-46	No	No	No
Afu1g03500	93.8936	78.5739	128.645	90.847	3.66526e-14	1.07259e-62	433.734	No	No	No
Afu1g03510	270.308	275.639	308.784	356.376	3513.83	1.0191e-06	1.13996e-57	No	No	No
Afu1g03520	5.09187	2.21681	4.36425	3.08322	1.38831e-05	1937.7	0.00979814	No	No	No
Afu1g03530	18.052	6.27355	17.3477	9.62607	4.24837e-39	4963.43	2.38266e-25	No	No	No
Afu1g03540	32.0312	58.9081	31.1719	36.9785	2.86532e-69	4810.7	0.0542188	No	No	No
Afu1g03550	62.1335	29.54	69.5964	50.6963	4.19279e-86	1.73056	2.72867e-10	No	No	No
Afu1g03560	41.9328	15.2861	47.1575	39.1002	5.557e-74	44.9142	490.899	No	No	No
Afu1g03570	7.02289	4.02414	7.03031	7.09102	0.0614448	9784	9437.86	No	No	No
Afu1g03580	19.4364	14.1963	14.6546	14.3226	29.89	72.0176	3.56298	No	No	No
Afu1g03590	26.3093	30.6122	24.0665	43.8523	0.151858	159.436	1.49623e-74	No	No	No
Afu1g03600	14.1416	8.43983	16.8133	10.4916	5.68115e-05	223.104	0.143552	No	No	No
Afu1g03610	8.68233	16.933	123.536	272.267	1.40025e-06	0	0	No	Up	Up
Afu1g03620	36.3827	38.4676	36.7391	42.0147	2150.94	8203.71	0.916275	No	No	No
Afu1g03630	298.409	408.816	349.857	1131.52	9.62119e-50	6.69627e-10	0	No	No	No
Afu1g03640	122.552	179.695	115.031	102.321	3.50482e-15	1855.05	0.074358	No	No	No
Afu1g03650	6.32935	16.118	5.68466	12.3152	5.49597e-40	2204.13	1.44576e-23	No	No	No
Afu1g03660	37.0188	110.125	49.2313	96.075	2.32685e-144	0.000264455	1.53084e-139	No	No	No
Afu1g03670	0.240892	0.739371	0.186616	0.0532821	1350.55	9784	9784	No	No	No
Afu1g03680	114.632	55.1145	106.977	146.523	2.82346e-130	65.3621	1.95302e-31	No	No	No
Afu1g03690	51.74	36.9984	49.8897	46.7994	0.00473456	5435.51	514.792	No	No	No
Afu1g03700	5.58685	4.32981	6.14585	5.95625	115.344	3067.41	4151.99	No	No	No
Afu1g03710	44.3957	29.215	61.3296	60.3168	2.76824e-14	9.28411e-12	1.76904e-15	No	No	No
Afu1g03720	388.268	202.571	682.78	363.771	4.77035e-113	2.5807e-152	13.2727	No	No	No
Afu1g03730	118.886	143.377	124.453	63.0864	4.15183e-10	734.425	2.05404e-145	No	No	No
Afu1g03740	82.4317	40.2218	71.8002	68.9982	2.81674e-138	0.000210057	3.61658e-14	No	No	No
Afu1g03750	35.3888	20.7975	30.5022	31.1356	6.12736e-22	12.5368	7.04138	No	No	No
Afu1g03760	25.1518	19.9584	22.8526	25.3598	1.00113e-05	91.407	7835.16	No	No	No
Afu1g03775	14.4009	10.4675	11.4293	13.233	0.00295425	1.50794	805.425	No	No	No
Afu1g03790	35.7662	23.9756	46.5571	7.83748	2.23106e-06	0.0112016	2.60093e-121	No	No	Down
Afu1g03800	19.7294	43.5459	37.0828	20.3666	2.64903e-87	2.87346e-50	4179.4	No	No	No
Afu1g03810	117.467	101.795	108.532	100.138	5.79798	539.271	0.0366292	No	No	No
Afu1g03820	20.8558	20.8917	21.3172	16.3063	9614.22	6048.69	8.18555e-07	No	No	No
Afu1g03830	107.025	165.434	157.024	155.736	1.41362e-15	4.39559e-11	9.14041e-16	No	No	No
Afu1g03840	103.427	108.374	133.318	133.931	2429.72	2.63654e-07	5.84855e-12	No	No	No
Afu1g03860	12.5027	6.36189	11.512	8.5658	6.63782e-17	1837.4	5.08744e-08	No	No	No
Afu1g03870	32.8411	10.3044	36.4972	16.7043	3.31406e-68	267.002	2.6816e-44	No	No	No
Afu1g03880	46.8736	19.37	42.8828	28.6946	9.34491e-57	457.737	5.19409e-31	No	No	No
Afu1g03890	86.8175	65.1145	65.2977	34.3651	2.0232e-19	5.91301e-19	9.74405e-259	No	No	No
Afu1g03910	43.883	21.8553	45.0789	40.393	7.02924e-41	5197.33	185.721	No	No	No
Afu1g03920	66.1509	29.6111	42.8444	29.8923	3.58102e-154	3.89479e-52	1.70712e-236	No	No	No
Afu1g03930	15.2621	21.8581	15.2993	14.5235	5.728e-16	9449.75	1643.2	No	No	No
Afu1g03940	78.2638	78.7282	84.4848	67.6266	8129.78	36.9189	1.61132e-06	No	No	No
Afu1g03950	97.568	84.199	126.66	254.823	0.000739904	9.08296e-22	0	No	No	No
Afu1g03960	64.9766	60.3327	81.9203	89.0095	1445.38	0.00971264	6.62982e-12	No	No	No
Afu1g03970	78.8386	116.919	71.67	93.1088	6.28428e-93	0.0701603	1.97026e-19	No	No	No
Afu1g03992	14.3936	13.598	15.406	15.7563	2039.34	1202.43	128.908	No	No	No
Afu1g04010	43.6394	34.3481	53.19	48.273	0.00368009	0.0323989	55.3412	No	No	No
Afu1g04020	89.3109	78.8263	117.912	120.922	11.1693	1.78901e-11	2.45501e-21	No	No	No
Afu1g04040	925.564	3559.62	1061.67	1470.84	0	1.14803e-13	3.48261e-295	No	No	No
Afu1g04062	86.741	98.4999	89.3347	85.5114	0.0219366	2839.51	5210.83	No	No	No
Afu1g04070	2698.66	5676.28	3485.5	2980.95	0	4.61719e-187	4.31059e-36	No	No	No
Afu1g04080	41.0723	29.3639	54.9693	68.4682	8.19522e-14	5.09869e-14	1.317e-75	No	No	No
Afu1g04090	5.82851	6.84468	6.87107	12.4323	1890.93	1700.13	1.53202e-13	No	No	No
Afu1g04100	77.1089	19.927	66.0029	24.7879	5.38224e-89	17.2936	2.80981e-112	No	No	No
Afu1g04110	27.6208	10.8179	28.5485	19.5001	1.9332e-77	3944.6	1.47688e-19	No	No	No
Afu1g04120	11.88	14.156	11.3078	19.4163	196.533	5168.11	6.30221e-13	No	No	No
Afu1g04130	668.057	9.43719	412.421	133.943	0	1.64671e-225	0	Down	No	Down
Afu1g04140	52.685	49.7241	41.3491	30.4646	2619.63	0.0736115	1.68278e-27	No	No	No
Afu1g04150	252.273	245.79	133.07	75.7394	1900.13	5.01867e-164	0	No	No	No
Afu1g04160	50.0622	10.8746	46.6603	3.28732	1.5816e-148	855.377	0	Down	No	Down
Afu1g04170	7.89141	12.0876	9.4711	13.8117	8.40762e-05	213.259	4.73947e-16	No	No	No
Afu1g04190	84.3745	233.966	71.2334	84.4468	0	1.0367e-07	9551.94	No	No	No
Afu1g04210	39.532	34.4605	36.5378	40.2547	0.0118317	48.0136	4207.34	No	No	No
Afu1g04220	18.8885	13.6411	23.7321	19.3447	136.854	511.283	8229.53	No	No	No
Afu1g04230	57.7326	68.0444	93.1466	76.0051	138.021	7.51363e-11	0.00398638	No	No	No
Afu1g04240	36.0724	55.4731	39.0204	27.0513	2.96376e-45	132.458	3.72216e-20	No	No	No
Afu1g04250	25.4874	31.3134	26.5112	28.409	303.967	7139.33	1872.82	No	No	No
Afu1g04260	115.79	33.8255	86.8497	35.7733	0	2.87146e-46	0	No	No	No
Afu1g04270	58.0664	30.4053	45.1889	51.8338	1.77172e-47	1.38245e-06	2.65305	No	No	No
Afu1g04280	47.0079	107.237	74.8435	64.1328	3.10947e-99	8.14615e-25	1.52948e-13	No	No	No
Afu1g04290	65.4536	51.1364	58.3996	43.0846	1.53972e-20	0.0115035	2.38066e-88	No	No	No
Afu1g04300	15.4333	6.44881	14.6786	26.0247	4.61476e-10	5884.14	1.05788e-09	No	No	No
Afu1g04310	23.4619	21.3416	31.923	22.0599	2440.89	0.391513	3486.07	No	No	No
Afu1g04315	36.7468	39.209	61.5375	84.3724	3219.26	2.01537e-14	4.03385e-67	No	No	No
Afu1g04320	435.365	1675.93	417.054	699.637	0	359.66	4.66376e-206	No	No	No
Afu1g04330	26.0751	14.4901	39.2944	19.9008	7.07018e-13	1.5263e-09	0.00406734	No	No	No
Afu1g04340	11.9508	11.3758	10.9206	13.7655	1974.17	213.496	0.0492878	No	No	No
Afu1g04350	54.5433	64.9234	35.508	46.7213	0.324222	8.98621e-15	0.345743	No	No	No
Afu1g04360	21.1676	17.3359	19.7315	30.0259	0.000209144	430.106	4.26473e-36	No	No	No
Afu1g04370	18.8396	77.3386	24.4092	29.7899	1.94325e-193	0.367988	9.65236e-16	Up	No	No
Afu1g04380	39.1888	89.9257	37.3186	42.4104	4.40923e-144	2135.24	138.161	No	No	No
Afu1g04390	91.0941	32.0184	90.1571	54.4849	1.01315e-189	6944.46	1.61682e-88	No	No	No
Afu1g04400	58.8178	79.0203	106.216	99.6819	0.486971	2.37638e-14	1.33977e-15	No	No	No
Afu1g04410	35.3208	30.9399	33.0364	36.7021	39.163	1377.97	2941.49	No	No	No
Afu1g04420	11.9839	10.5353	19.8587	28.3149	2566.88	0.00184105	7.10344e-26	No	No	No
Afu1g04430	222.054	44.5471	262.643	481.531	0	5.46551e-15	0	Down	No	No
Afu1g04440	53.6623	49.4983	50.4436	36.8555	360.315	1073.93	1.08641e-24	No	No	No
Afu1g04450	40.012	41.9378	41.0359	71.7102	2535.83	5367.4	3.43061e-76	No	No	No
Afu1g04455	6.07876	3.19143	6.19623	4.24591	111.68	9784	608.62	No	No	No
Afu1g04460	10.6503	18.5733	24.0297	15.4191	2.32279e-12	2.09219e-33	6.15565e-06	No	No	No
Afu1g04470	123.944	164.137	191.698	150.757	0.000806508	5.0307e-14	0.116784	No	No	No
Afu1g04480	21.3891	22.7745	27.0144	32.9201	1515.89	0.000357357	8.52973e-33	No	No	No
Afu1g04490	104.982	51.2069	145.205	118.108	2.49674e-92	2.06796e-29	0.00629707	No	No	No
Afu1g04510	4.91143	26.593	7.18093	24.4503	3.32843e-54	89.4345	1.4224e-61	Up	No	Up
Afu1g04520	54.4675	60.4692	64.0408	59.0555	50.5356	0.115751	97.2161	No	No	No
Afu1g04530	369.527	1326.1	374.841	615.302	0	5696.47	1.19297e-150	No	No	No
Afu1g04540	140.55	57.6094	195.538	123.163	3.70882e-140	1.14313e-32	0.000393954	No	No	No
Afu1g04550	113.145	115.1	152.739	146.023	5849.96	1.41059e-19	1.09904e-19	No	No	No
Afu1g04560	70.3476	76.1902	76.258	108.297	6.43342	5.52622	6.98123e-121	No	No	No
Afu1g04570	9.69765	8.33256	7.93118	9.3089	363.445	65.698	4664.77	No	No	No
Afu1g04575	107.835	19.1744	121.264	129.374	5.6496e-256	2.86628	9.23522e-08	Down	No	No
Afu1g04580	17.7807	6.09665	12.8526	14.4076	1.18018e-40	0.00406863	0.384283	No	No	No
Afu1g04590	30.0045	26.2413	29.6941	43.6937	23.9334	7961.94	3.23939e-26	No	No	No
Afu1g04600	52.7379	24.3655	43.5051	15.3045	1.06471e-55	0.0315929	3.66907e-191	No	No	No
Afu1g04610	24.9067	27.9719	30.4765	41.0281	868.443	23.6947	8.73873e-18	No	No	No
Afu1g04620	231.57	273.356	234.481	428.176	3.59707e-12	5490.29	0	No	No	No
Afu1g04630	233.424	243.959	185.878	402.461	2376.42	0.000101939	2.58278e-80	No	No	No
Afu1g04640	31.344	28.3123	28.9534	29.4421	13.2581	118.773	158.183	No	No	No
Afu1g04650	6.81044	5.87479	7.55186	4.69635	1937.42	3393.49	0.987347	No	No	No
Afu1g04660	661.951	1963.49	612.878	1013.8	0	0.0394403	5.16881e-251	No	No	No
Afu1g04670	55.2522	40.722	51.3099	88.5769	2.35787e-21	75.9632	5.62865e-112	No	No	No
Afu1g04680	111.96	144.576	151.929	98.4187	5.79097e-14	2.14977e-21	0.0150377	No	No	No
Afu1g04690	119.96	150.453	162.859	118.251	1.84909e-05	1.62312e-12	6513.55	No	No	No
Afu1g04700	43.3865	29.893	48.4673	45.8796	1.43263e-24	2.23869	273.911	No	No	No
Afu1g04710	29.3276	56.1663	31.0088	38.5339	1.21531e-40	3036.31	1.6364e-06	No	No	No
Afu1g04720	38.1362	45.171	59.0873	39.6663	52.6248	1.2558e-10	4612.87	No	No	No
Afu1g04730	25.2735	10.584	24.1586	9.81594	7.76443e-16	5699.07	1.4334e-30	No	No	No
Afu1g04740	1.15901	3.26091	2.09503	1.45269	207.539	2579.84	8187.84	No	No	No
Afu1g04750	137.255	16.4091	143.54	62.538	0	676.827	6.6793e-231	Down	No	No
Afu1g04760	18.411	26.8902	29.1921	29.9775	0.000255115	5.29954e-08	4.01286e-14	No	No	No
Afu1g04770	23.1929	27.1246	27.4499	25.9347	4.38872	1.59517	30.8286	No	No	No
Afu1g04780	123.891	30.3632	152.432	48.6783	0	4.68949e-27	0	Down	No	No
Afu1g04790	58.1329	25.8236	71.8472	93.0477	4.08025e-88	1.24271e-07	6.98227e-76	No	No	No
Afu1g04800	74.7812	91.7196	76.5071	84.8559	0.000106301	5388.71	0.322464	No	No	No
Afu1g04810	35.3829	55.944	56.7461	51.1642	5.88012e-11	8.34903e-12	3.39742e-09	No	No	No
Afu1g04820	44.6268	102.551	53.9591	165.404	4.96791e-95	0.399189	0	No	No	No
Afu1g04830	98.094	15.6526	93.8225	33.0649	0	404.598	0	Down	No	No
Afu1g04840	62.1463	160.445	79.331	58.2187	0	2.29827e-18	33.7903	No	No	No
Afu1g04850	229.329	215.828	274.168	378.718	1436.31	0.0508071	4.10138e-56	No	No	No
Afu1g04860	112.918	159.658	149.409	102.468	1.049e-10	8.13492e-06	173.251	No	No	No
Afu1g04870	7.55008	40.2524	9.4987	21.6429	1.07249e-191	44.6015	1.20048e-73	Up	No	No
Afu1g04880	156.92	148.559	189.687	193.695	383.781	4.10542e-10	7.23e-20	No	No	No
Afu1g04890	149.729	329.576	139.911	121.185	1.46031e-102	1231.28	0.000179151	No	No	No
Afu1g04900	317.415	128.12	316.206	194.641	1.55135e-261	8394.72	2.03625e-139	No	No	No
Afu1g04910	70.9341	28.3881	66.1275	49.0615	3.77703e-140	168.409	1.09917e-42	No	No	No
Afu1g04920	9.91546	6.75786	13.864	10.9435	6.13329e-05	1.5395e-05	460.801	No	No	No
Afu1g04930	155.064	59.2497	106.625	105.693	0	1.80544e-75	1.34019e-119	No	No	No
Afu1g04940	322.871	425.868	373.35	531.583	4.43368e-30	6.49794e-06	7.91556e-160	No	No	No
Afu1g04950	162.29	227.285	172.821	219.991	5.20215e-40	154.132	1.2362e-45	No	No	No
Afu1g04960	44.7539	60.8752	67.7484	85.8176	2.87302e-21	1.18316e-42	8.37809e-169	No	No	No
Afu1g04970	29.0337	21.7054	33.638	39.8461	8.37731e-07	2.7315	3.75183e-18	No	No	No
Afu1g04980	14.9832	16.7581	13.7783	26.0003	146.997	812.387	5.77842e-52	No	No	No
Afu1g04990	93.661	135.177	100.324	126.08	2.87135e-53	55.9802	1.57659e-47	No	No	No
Afu1g05000	92.8725	69.4679	125.653	96.5966	0.00276428	8.00876e-06	3682.72	No	No	No
Afu1g05010	4.69986	7.12077	5.14831	6.11809	0.163064	3986	17.6307	No	No	No
Afu1g05020	11.7591	12.636	12.7011	84.4643	2216.7	1998.08	0	No	No	Up
Afu1g05030	3.08999	1.8854	4.78755	2.1245	27.7947	10.572	37.7769	No	No	No
Afu1g05040	219.645	433.209	433.073	450.677	0	0	0	No	No	No
Afu1g05050	41.3639	18.1369	74.0953	68.6337	1.38636e-14	3.04276e-14	1.93237e-14	No	No	No
Afu1g05060	97.4425	79.0317	99.042	201.905	4.46984e-06	5975.38	3.24072e-218	No	No	No
Afu1g05070	15.306	19.6474	28.5712	24.8779	1.13841	6.62391e-22	7.1143e-17	No	No	No
Afu1g05080	231.103	866.392	247.938	330.082	0	13.8406	2.29382e-90	No	No	No
Afu1g05090	92.1412	416.149	102.259	139.613	0	380.555	3.37319e-22	Up	No	No
Afu1g05100	28.259	18.1741	27.4391	28.3286	1.00491e-20	4476.33	9282.6	No	No	No
Afu1g05110	44.7194	124.579	48.0417	50.4335	7.56153e-304	371.524	0.230076	No	No	No
Afu1g05120	26.959	98.2783	26.9913	45.0318	9.37789e-220	9784	5.0451e-31	No	No	No
Afu1g05130	119.9	52.3006	130.15	71.9067	0	0.00200101	8.50513e-260	No	No	No
Afu1g05140	27.9582	37.7836	31.1347	8.48316	1.3159e-05	402.07	8.52685e-98	No	No	No
Afu1g05150	26.5263	41.2749	22.2359	15.3496	4.2292e-19	6.85473	6.78083e-29	No	No	No
Afu1g05160	106.424	225.297	140.803	114.063	2.02878e-81	7.24395e-07	655.016	No	No	No
Afu1g05170	13.2601	70.5047	16.3705	21.2976	3.50407e-216	51.3737	2.88417e-11	Up	No	No
Afu1g05180	28.7305	41.2122	27.9875	38.3896	0.0145273	7574.81	0.0610021	No	No	No
Afu1g05190	83.7348	67.3871	87.8615	188.077	5.67621e-07	1245.1	2.03286e-286	No	No	No
Afu1g05200	68.0062	167.003	61.625	82.1889	0	0.197997	7.40968e-22	No	No	No
Afu1g05210	145.356	100.14	209.523	222.368	7.81926e-07	3.01908e-10	2.52297e-22	No	No	No
Afu1g05220	327.999	195.556	322.734	180.532	2.20129e-63	5302.27	2.40332e-126	No	No	No
Afu1g05230	29.3623	30.6848	24.9991	39.1122	2013.36	0.108862	2.70056e-21	No	No	No
Afu1g05240	28.7072	25.6265	24.9734	16.8968	0.522163	0.00809986	9.86552e-95	No	No	No
Afu1g05260	20.9115	15.7618	25.886	43.9792	8.16397e-06	0.00182048	1.92544e-125	No	No	No
Afu1g05270	112.947	21.3374	100.291	175.198	5.53413e-262	3.37467	7.97209e-68	Down	No	No
Afu1g05280	16.1461	14.4757	16.2417	16.5996	46.0947	8615.29	3708.53	No	No	No
Afu1g05290	131.802	3.8729	187.06	22.7083	0	1.08853e-38	0	Down	No	Down
Afu1g05300	19.4705	15.0347	19.4703	26.4931	0.00018137	9784	8.28639e-16	No	No	No
Afu1g05310	21.3394	75.1273	23.9942	22.6703	0	25.3327	663.125	No	No	No
Afu1g05320	54.2032	371.175	66.761	70.9508	0	4.93839e-05	6.56164e-16	Up	No	No
Afu1g05330	28.8559	44.0108	28.4788	21.0798	2.67948e-17	7871.92	5.1091e-09	No	No	No
Afu1g05340	196.457	695.7	187.133	291.364	0	961.502	7.13683e-67	No	No	No
Afu1g05350	33.9639	19.5772	49.7272	65.6701	0.0015145	0.0601196	9.85995e-19	No	No	No
Afu1g05360	13.4719	6.49853	13.3709	26.3281	4.16859e-15	8980.6	3.07027e-37	No	No	No
Afu1g05370	76.2792	137.718	92.0863	106.751	1.48377e-77	0.00033502	6.66917e-30	No	No	No
Afu1g05380	69.7579	63.9816	91.1332	104.287	577.334	1.5342e-06	4.5647e-28	No	No	No
Afu1g05390	922.34	1419.64	1157.18	1230.46	0	6.82742e-96	5.06708e-229	No	No	No
Afu1g05400	313.42	531.339	390.611	407.248	2.52397e-57	1.69064e-06	5.86497e-16	No	No	No
Afu1g05410	30.283	105.914	36.8838	28.4637	0	0.0278685	931.869	No	No	No
Afu1g05420	26.8435	26.1226	28.0363	34.8234	3817.25	1590.31	2.30095e-22	No	No	No
Afu1g05430	9.81717	76.2625	12.8203	15.1793	1.47117e-145	299.871	0.128013	Up	No	No
Afu1g05440	22.3158	99.5915	15.0948	17.9594	3.61012e-266	6.19484e-05	0.394607	Up	No	No
Afu1g05450	125.375	174.158	175.34	207.566	5.2092e-10	1.60382e-10	6.50971e-42	No	No	No
Afu1g05460	73.7965	85.6124	83.067	98.6577	5.94076	66.2107	1.4507e-12	No	No	No
Afu1g05470	51.4521	48.1924	53.3829	62.6073	1720.12	4279.04	0.00255392	No	No	No
Afu1g05480	7.34513	6.524	7.7558	5.27453	2997.82	6121.69	6.66768	No	No	No
Afu1g05490	52.1425	71.1836	57.7834	73.0149	3.55439e-42	0.0805623	7.9668e-72	No	No	No
Afu1g05500	550.164	2326.19	547.415	1029.83	0	7965.33	0	Up	No	No
Afu1g05510	24.2627	27.4375	29.8295	49.1071	105.1	0.127382	4.97963e-83	No	No	No
Afu1g05520	20.9557	9.73795	48.4545	38.1661	1.90906e-17	1.73094e-48	9.48817e-30	No	No	No
Afu1g05530	44.4913	42.5384	45.6043	55.5161	3387.31	5974.93	2.43557e-05	No	No	No
Afu1g05540	59.4195	25.0431	60.0754	46.3907	1.10943e-125	6911.85	1.32995e-18	No	No	No
Afu1g05550	74.1995	17.0339	90.4233	82.4184	3.03105e-191	2.61627e-05	2.16987	Down	No	No
Afu1g05560	96.2363	180.402	109.898	96.8852	2.72366e-118	0.111848	7893.79	No	No	No
Afu1g05570	12.361	10.2814	15.3507	13.086	1396.04	546.798	5594.5	No	No	No
Afu1g05580	30.3221	11.7408	35.8853	65.0329	2.90036e-74	0.154968	7.45289e-151	No	No	No
Afu1g05590	99.0807	69.9464	96.037	89.6036	5.09121e-27	2579.96	0.169334	No	No	No
Afu1g05595	82.4084	21.681	85.0776	48.4779	1.30524e-281	2298.94	7.0087e-98	No	No	No
Afu1g05600	8.1301	7.62477	11.4302	9.65737	7791.33	1625.38	4773.98	No	No	No
Afu1g05610	223.276	110.414	213.846	213.64	3.93885e-291	83.3874	11.225	No	No	No
Afu1g05620	84.731	260.301	86.5172	144.385	0	4316.67	1.13844e-153	No	No	No
Afu1g05630	452.845	1543.68	443.433	713.661	0	2238.56	7.18274e-259	No	No	No
Afu1g05640	71.8008	51.6655	67.7298	73.0507	4.87397e-28	256.946	4150.03	No	No	No
Afu1g05650	14.8915	18.0174	17.222	17.2866	4.00441	79.85	10.4805	No	No	No
Afu1g05655	60.8322	49.0989	66.8617	75.5049	0.0096527	203.43	7.26204e-07	No	No	No
Afu1g05660	36.9218	75.0482	51.637	46.2052	2.71563e-27	0.00529936	1.00944	No	No	No
Afu1g05670	2.54768	2.84789	4.55647	4.89769	4644.73	0.0801764	1.80309e-05	No	No	No
Afu1g05680	184.045	97.0479	186.854	69.418	4.41427e-113	5164.61	0	No	No	No
Afu1g05690	15.7756	9.49331	15.7996	12.6011	3.07927e-12	9784	0.0244837	No	No	No
Afu1g05700	96.4639	103.697	113.856	94.6053	2626.52	78.4556	7094.37	No	No	No
Afu1g05710	18.8865	7.14681	15.8051	8.8127	4.72696e-35	39.2387	2.97415e-37	No	No	No
Afu1g05720	26.8488	9.52794	30.9603	20.6896	2.55289e-50	49.674	0.000105111	No	No	No
Afu1g05730	126.432	73.4472	134.734	74.7554	2.69036e-55	285.021	3.66929e-80	No	No	No
Afu1g05740	11.9391	10.8965	14.063	14.2764	1060.41	20.8959	0.549604	No	No	No
Afu1g05745	62.938	9.14366	61.5642	34.3385	3.83716e-135	6453.39	1.10311e-36	Down	No	No
Afu1g05750	31.9096	27.4394	34.7074	32.3609	105.979	1305.1	7612.77	No	No	No
Afu1g05760	31.1147	25.516	32.056	29.1959	5.85948	5899.34	1619.87	No	No	No
Afu1g05770	92.3071	32.3325	95.1007	24.4795	2.18977404034657e-317	1588.69	0	No	No	No
Afu1g05780	2.28384	3.5049	1.83027	3.08319	642.121	4225.27	1443.76	No	No	No
Afu1g05790	201.469	392.221	687.917	3113.26	1.23255e-140	0	0	No	No	Up
Afu1g05800	224.056	121.641	230.602	448.602	4.09003e-187	1049.66	0	No	No	No
Afu1g05810	20.7389	18.0162	24.4559	39.2721	16.2247	0.783622	1.09878e-86	No	No	No
Afu1g05820	175.816	158.325	247.239	221.963	215.44	1.17705e-12	4.5522e-07	No	No	No
Afu1g05830	22.5579	29.8836	23.2002	27.7752	4.36922e-21	3328.23	3.19783e-15	No	No	No
Afu1g05840	23.0086	11.7076	20.1648	19.1756	2.11847e-28	86.9555	0.117958	No	No	No
Afu1g05850	4.58941	2.7089	5.12792	4.79252	4.3266	4021.51	7332.11	No	No	No
Afu1g05860	3.08401	2.28886	3.3683	3.41071	1145.88	6053.53	4872.88	No	No	No
Afu1g05870	31.5695	29.7208	46.5558	46.8181	3107.95	1.01551e-08	8.41092e-14	No	No	No
Afu1g05880	5.75006	3.12081	6.62742	3.75347	110.733	5375.47	236.312	No	No	No
Afu1g05890	6.6051	4.05462	7.41949	2.77582	1741.42	7571.96	29.9332	No	No	No
Afu1g05900	42.1908	66.6726	60.9809	94.6321	9.2553e-44	3.39397e-26	2.88169e-228	No	No	No
Afu1g05910	54.0492	15.6446	57.9027	46.2361	1.88135e-127	646.753	0.0140989	No	No	No
Afu1g05920	24.5765	31.7401	29.6353	80.8154	9.92611e-06	0.121189	0	No	No	No
Afu1g05930	60.7921	49.5884	52.1759	60.7264	2.00203e-11	1.69287e-05	9387.95	No	No	No
Afu1g05940	51.3175	38.7881	67.1176	46.7334	0.804607	0.187963	942.958	No	No	No
Afu1g05950	55.3719	21.5789	49.6544	18.797	5.33102e-73	87.9972	6.96603e-146	No	No	No
Afu1g05960	23.6129	8.92929	26.6343	25.5845	2.13413e-79	19.9318	145.755	No	No	No
Afu1g05970	94.2516	79.8965	96.6874	106.18	5.17041e-06	3140.82	9.89701e-05	No	No	No
Afu1g05980	80.0192	7.17389	75.5665	20.1681	0	433.265	0	Down	No	No
Afu1g05990	493.74	2101.41	524.786	825.791	0	11.4032	2.95036e-281	Up	No	No
Afu1g06000	4.74642	13.9753	5.3017	3.73549	2.17946e-18	4352.11	556.252	No	No	No
Afu1g06010	4.45617	4.80439	5.50594	3.9301	6464.31	1554.46	3192.54	No	No	No
Afu1g06020	41.6121	20.3531	54.8315	52.0794	1.93377e-51	2.19312e-10	2.40059e-09	No	No	No
Afu1g06030	67.2985	82.3186	65.1597	112.43	5.7595e-13	2019.61	1.093e-157	No	No	No
Afu1g06040	27.6365	14.1078	25.6376	23.3726	1.47416e-26	1369.07	0.873253	No	No	No
Afu1g06050	124.874	23.6035	113.729	77.2523	0	3.91976	1.17512e-88	Down	No	No
Afu1g06060	53.0583	39.0231	46.8839	67.8815	1.00737e-37	0.000127742	2.86217e-45	No	No	No
Afu1g06071	16.3026	15.8499	22.5143	24.4312	6115.98	1.16863e-05	3.06305e-16	No	No	No
Afu1g06080	48.695	147.347	47.7884	45.9794	1.71736e-238	6630.48	1137.3	No	No	No
Afu1g06090	47.3869	43.6279	54.6118	103.819	277.879	0.730939	7.52721e-193	No	No	No
Afu1g06100	204.162	258.098	191.118	83.808	2.39498e-05	1195.87	8.18497e-101	No	No	No
Afu1g06110	39.0469	38.1099	66.0686	42.2985	5940.51	1.35781e-33	357.36	No	No	No
Afu1g06120	0.0865785	0.498255	0.201214	0.21065	115.935	4688.19	2862.26	No	No	No
Afu1g06130	7.36411	18.3073	6.81803	15.6395	1.25738e-36	3773	2.00689e-31	No	No	No
Afu1g06140	10.5571	16.7666	7.26549	18.1485	0.000135153	1.66998	1.39051e-11	No	No	No
Afu1g06150	35.3965	117.485	23.509	7.75816	5.07661e-241	1.09131e-10	1.18069e-174	No	No	Down
Afu1g06160	14.6669	13.3115	9.99797	7.29055	916.269	6.20916e-06	5.83844e-35	No	No	No
Afu1g06170	262.09	239.966	342.183	312.597	0.00538599	6.74461e-57	3.67596e-33	No	No	No
Afu1g06180	81.3404	57.2314	99.9165	91.2799	1.54596e-12	0.00037191	2.98316	No	No	No
Afu1g06190	76.2927	340.508	83.255	129.229	0	153.935	1.80216e-78	Up	No	No
Afu1g06200	66.1006	35.6697	79.1213	69.4307	2.55593e-35	0.0395442	1429.52	No	No	No
Afu1g06210	249.068	110.397	193.873	199.091	0	5.56038e-45	1.88248e-54	No	No	No
Afu1g06220	17.2291	67.6963	23.1396	18.3074	2.59014e-175	0.0237025	2738.68	No	No	No
Afu1g06230	31.5401	95.0096	38.6956	24.4321	1.51522e-172	0.245059	7.6271e-05	No	No	No
Afu1g06240	361.827	118.106	388.899	236.978	0	3.88735	6.7111e-110	No	No	No
Afu1g06250	36.564	16.1676	41.9928	32.6733	2.74025e-42	23.7737	46.6653	No	No	No
Afu1g06260	17.9081	23.9969	20.8863	18.0285	0.000394416	52.236	8864.05	No	No	No
Afu1g06270	15.1009	15.7902	15.3468	24.4338	5545.41	8287.19	2.24586e-12	No	No	No
Afu1g06280	101.438	111.116	110.932	94.3553	8.77782	10.8494	20.6599	No	No	No
Afu1g06290	54.5876	128.115	65.7252	53.1355	7.28717e-166	0.00277284	3840.54	No	No	No
Afu1g06300	143.042	100.665	193.11	149.414	5.58107e-36	1.03972e-35	307.389	No	No	No
Afu1g06310	100.536	75.1453	94.336	71.8964	1.5103e-20	181.065	5.6884e-42	No	No	No
Afu1g06320	138.634	97.5094	210.462	376.255	1.03965e-31	1.70997e-66	0	No	No	No
Afu1g06330	28.6681	17.3293	40.1518	49.6888	5.61623e-71	1.48162e-46	6.91501e-198	No	No	No
Afu1g06340	808.193	3238.45	1050.56	1273.66	0	1.48883e-68	0	Up	No	No
Afu1g06350	785.269	640.333	737.768	2892.47	2.17881e-31	0.866283	0	No	No	No
Afu1g06360	22.4996	18.1323	23.2402	25.7125	28.77	6447.79	175.334	No	No	No
Afu1g06370	109.165	97.193	120.904	161.49	101.9	173.58	5.21114e-27	No	No	No
Afu1g06380	44.6268	103.133	45.8246	74.6313	1.3629e-30	7553.5	2.34452e-12	No	No	No
Afu1g06390	2987.53	10775.9	3235.34	5749.53	0	1.3112e-56	0	No	No	No
Afu1g06400	47.609	56.1922	41.802	59.5015	1.44938e-05	0.0998162	8.73647e-19	No	No	No
Afu1g06410	41.7351	37.6533	39.7249	34.0894	97.3724	2093.23	1.63255e-05	No	No	No
Afu1g06420	123.314	177.83	145.606	210.323	3.31636e-24	0.0202085	2.37419e-82	No	No	No
Afu1g06430	59.7784	48.5057	61.7461	68.2082	18.6525	5995.89	110.392	No	No	No
Afu1g06440	11.452	14.9886	14.0656	15.3905	1.41534	41.6245	0.00549318	No	No	No
Afu1g06450	6.00009	6.69677	7.63864	16.1484	3253.2	220.444	4.61262e-35	No	No	No
Afu1g06460	26.6091	62.1225	28.5084	39.6546	3.06503e-35	3838.19	6.89144e-07	No	No	No
Afu1g06470	44.2171	25.3235	50.0338	30.8622	2.60439e-46	1.04228	5.80538e-31	No	No	No
Afu1g06480	7.48868	5.40977	7.3432	17.6757	7.67842	8388.07	5.31614e-39	No	No	No
Afu1g06490	41.7084	25.971	37.0339	52.4134	1.25884e-19	61.6931	1.03041e-07	No	No	No
Afu1g06500	126.292	79.5904	129.157	113.026	1.96467e-33	4782.16	0.531736	No	No	No
Afu1g06510	29.5843	27.118	29.0151	30.2684	1948.3	7732.56	6884.87	No	No	No
Afu1g06520	38.1981	38.2703	45.3898	29.8024	9421.89	7.1513e-05	3.89512e-16	No	No	No
Afu1g06530	83.8502	75.931	91.2216	51.9719	99.0816	231.132	3.69944e-40	No	No	No
Afu1g06540	25.843	15.2117	20.6451	13.9094	4.03496e-20	0.0391623	9.8764e-43	No	No	No
Afu1g06550	20.4758	19.1549	22.2015	7.06453	2515.07	1510.01	1.14885e-70	No	No	No
Afu1g06560	8.17586	12.7137	4.05434	3.16868	1.30727e-07	3.1936e-12	1.55211e-35	No	No	No
Afu1g06570	58.4599	92.6304	81.7486	75.391	8.88866e-30	1.17292e-13	3.53716e-10	No	No	No
Afu1g06580	3503.33	2450.03	3426.73	3082.77	0	17.9574	8.30682e-97	No	No	No
Afu1g06590	403.604	159.133	414.796	144.104	1.03381e-249	2060.09	0	No	No	No
Afu1g06600	38.3196	90.4088	41.1402	43.1837	2.13709e-133	870.443	5.27098	No	No	No
Afu1g06610	75.2866	120.204	94.62	76.8739	3.40638e-26	0.00156775	5841.63	No	No	No
Afu1g06620	86.2909	115.742	116.022	138.608	2.04472e-08	1.39975e-08	1.25694e-40	No	No	No
Afu1g06630	49.1651	43.4955	51.4855	67.8195	92.6337	3036.29	1.83347e-15	No	No	No
Afu1g06640	6.1794	4.13887	9.57421	6.02319	33.5586	0.851461	7799.73	No	No	No
Afu1g06650	532.167	33.9371	479.4	34.341	0	6.23652e-11	0	Down	No	Down
Afu1g06660	68.8034	28.6023	69.56	69.9727	2.87012e-182	6459.4	4047.31	No	No	No
Afu1g06670	25.7713	17.3757	26.7628	32.506	1.21184e-05	5102.11	0.00722222	No	No	No
Afu1g06680	67.1594	47.6969	66.8291	66.3428	1.31011e-23	8542	5983.15	No	No	No
Afu1g06690	50.4524	103.068	60.7423	41.4854	1.1563e-79	0.0954279	0.00221908	No	No	No
Afu1g06700	210.205	298.301	223.913	285.615	1.84046e-89	5.62641	4.89003e-95	No	No	No
Afu1g06710	125.392	289.928	145.681	205.03	0	6.97769e-08	2.4238e-179	No	No	No
Afu1g06720	50.6748	43.8288	58.1915	48.2247	1.23266	0.948287	1021.22	No	No	No
Afu1g06730	18.3307	6.52407	14.6538	11.784	2.16842e-35	5.93296	1.93912e-11	No	No	No
Afu1g06740	26.3152	31.4233	41.8884	55.1696	98.0454	4.25954e-09	2.00686e-43	No	No	No
Afu1g06762	31.4585	23.1495	23.5438	24.0709	7.3181e-12	2.46607e-10	5.37421e-14	No	No	No
Afu1g06770	942.911	3239.09	1196.15	1470.67	0	7.76348e-41	3.32986e-230	No	No	No
Afu1g06780	74.047	50.9086	96.5879	91.1131	2.05791e-32	2.64292e-21	1.18391e-17	No	No	No
Afu1g06790	81.567	118.683	68.9347	109.431	2.09889e-88	1.08488e-11	2.18195e-73	No	No	No
Afu1g06800	20.1219	19.7074	19.1523	22.9133	7465.14	4668.93	177.391	No	No	No
Afu1g06810	21.8226	19.5774	26.6627	21.7567	189.09	0.0320224	9200.51	No	No	No
Afu1g06820	124.068	101.857	125.345	171.74	2.96102e-09	6841.32	7.47414e-55	No	No	No
Afu1g06830	1059.99	4711.53	1146.2	1591.53	0	0.0520111	1.38472e-198	Up	No	No
Afu1g06840	13.7132	30.3182	16.3474	12.1742	1.39517e-22	434.798	1144.93	No	No	No
Afu1g06850	22.2453	41.4882	28.7655	36.2567	7.02856e-49	8.61032e-05	1.0145e-38	No	No	No
Afu1g06860	59.3595	46.6407	61.2959	64.4704	7.91947e-09	3059.77	15.1463	No	No	No
Afu1g06870	10.9135	11.9632	11.0312	9.31084	4770.55	9279.37	1472.8	No	No	No
Afu1g06880	12.5959	14.3374	13.0414	9.63893	1549.85	7011.23	7.97007	No	No	No
Afu1g06890	54.2372	26.3541	49.4532	32.5666	2.52494e-65	89.6173	1.87318e-54	No	No	No
Afu1g06900	39.8126	33.8789	37.5864	45.6977	0.0792804	1018.52	0.00978694	No	No	No
Afu1g06910	15.5981	5.84045	17.9801	6.21252	2.78722e-19	597.609	1.06625e-28	No	No	No
Afu1g06920	33.2004	28.8706	43.309	76.2641	0.05727	2.24936e-17	0	No	No	No
Afu1g06930	53.6146	3.82266	63.4154	22.2323	0	9.50813e-07	5.25565e-238	Down	No	No
Afu1g06940	93.3558	180.094	79.8495	67.5947	5.58701e-135	0.00922079	1.04845e-28	No	No	No
Afu1g06950	22.4603	39.4868	24.3176	31.9223	2.47605e-23	1757.27	3.05817e-10	No	No	No
Afu1g06960	87.5327	264.642	101.203	236.215	0	0.0744905	0	No	No	No
Afu1g06970	14.4755	16.6741	12.9735	13.7144	236.818	1012.78	3051.59	No	No	No
Afu1g06980	35.898	65.1197	49.2071	46.8508	1.15355e-45	2.4996e-09	3.41446e-09	No	No	No
Afu1g07000	17.7511	22.7084	22.8217	20.6817	0.00519922	0.00306314	2.66702	No	No	No
Afu1g07010	131.414	68.9063	132.76	105.725	1.22119e-102	6810.58	2.51023e-19	No	No	No
Afu1g07020	21.3154	33.4633	18.6085	23.0679	7.39756e-12	347.784	1242.19	No	No	No
Afu1g07030	1.40098	2.48079	1.08532	2.1453	891.237	5444.56	1571.78	No	No	No
Afu1g07040	37.2393	52.2535	29.5678	20.0276	2.98637e-08	0.336535	1.70135e-32	No	No	No
Afu1g07050	22.3092	16.0752	21.7669	38.8699	6.23961e-10	5425.21	4.22216e-72	No	No	No
Afu1g07070	44.2009	94.349	49.465	88.8113	4.91538e-85	110.587	2.90022e-96	No	No	No
Afu1g07080	5.81562	11.2802	7.72782	12.6758	2.71647e-08	66.7892	5.97206e-19	No	No	No
Afu1g07090	73.898	82.4475	56.8947	54.9498	3.44044e-06	1.17263e-38	9.74333e-75	No	No	No
Afu1g07100	227.361	95.9022	167.276	144.515	1.05289e-101	8.45273e-15	2.21113e-50	No	No	No
Afu1g07110	100.804	30.7402	104.511	87.4441	9.08266e-143	2959.66	0.0150242	No	No	No
Afu1g07130	190.229	83.5836	200.379	147.708	5.83138e-140	476.006	5.88153e-24	No	No	No
Afu1g07140	25.046	23.885	35.0143	48.4815	3502.88	6.82812e-09	2.17996e-68	No	No	No
Afu1g07150	46.4431	47.3255	49.5752	58.8401	5496.83	420.253	3.64322e-16	No	No	No
Afu1g07160	41.9367	37.4884	37.0303	34.1255	5.08256	1.24712	3.58515e-10	No	No	No
Afu1g07170	124.22	98.2898	152.221	106.198	4.34001e-18	1.56358e-16	1.34704e-11	No	No	No
Afu1g07180	108.955	42.5858	99.6897	66.5903	1.47466e-149	22.2915	5.63045e-76	No	No	No
Afu1g07190	4.74667	4.07074	7.35437	3.97315	4290.45	110.43	2733.2	No	No	No
Afu1g07195	44.906	72.2819	43.6425	52.9938	8.43629e-27	5325.87	0.0861764	No	No	No
Afu1g07200	46.5845	31.7072	68.6413	71.0904	6.32508e-15	6.5606e-23	1.65182e-40	No	No	No
Afu1g07210	49.7697	58.8326	26.6302	31.3061	179.074	1.74455e-09	2.50431e-08	No	No	No
Afu1g07220	137.439	257.059	135.848	95.7026	7.10263e-308	5362.22	2.03659e-94	No	No	No
Afu1g07230	54.488	189.789	67.0334	21.83	3.65579e-220	0.398377	1.61607e-64	No	No	No
Afu1g07240	46.9817	48.3553	52.5409	78.0479	4115.17	11.7895	1.26978e-77	No	No	No
Afu1g07250	64.655	35.9406	65.0497	27.1396	3.22536e-78	8035.41	2.89007e-238	No	No	No
Afu1g07260	63.13	34.5862	80.2142	41.7221	5.72834e-45	9.64062e-09	1.45355e-34	No	No	No
Afu1g07270	91.4932	16.9049	82.1228	41.1621	4.26394e-53	1408.96	2.29705e-27	Down	No	No
Afu1g07280	26.0061	45.171	32.6807	39.2848	1.29219e-25	0.159684	4.71831e-18	No	No	No
Afu1g07300	24.5177	18.0633	20.0602	37.0079	0.00538844	7.79017	2.35002e-17	No	No	No
Afu1g07310	32.942	44.7782	44.9745	38.1366	6.96177e-05	4.21069e-05	15.524	No	No	No
Afu1g07320	30.7867	25.0043	28.4656	28.8198	0.00125712	397.582	344.627	No	No	No
Afu1g07330	7.18509	3.77908	5.87979	3.05165	1.78111e-05	374.151	7.92593e-18	No	No	No
Afu1g07340	21.4712	9.13785	19.5801	11.063	6.87351e-34	987.231	1.96414e-34	No	No	No
Afu1g07350	58.9254	39.9837	54.8781	67.5234	2.62489e-37	77.5188	1.48764e-06	No	No	No
Afu1g07360	31.522	38.1765	36.2469	38.4963	47.3859	430.174	4.51454	No	No	No
Afu1g07370	1.26755	2.09489	1.13303	1.61749	1529.37	8312.34	4792.03	No	No	No
Afu1g07380	96.4395	292.907	116.197	183.097	0	1.52301e-44	0	No	No	No
Afu1g07400	15.1813	7.50345	14.9834	12.153	6.76444e-10	8544.58	11.4713	No	No	No
Afu1g07420	52.394	50	66.342	86.8231	4671.97	0.926498	6.41264e-22	No	No	No
Afu1g07430	340.033	224.342	381.607	183.461	3.09807e-33	0.633778	3.61446e-106	No	No	No
Afu1g07440	361.323	850.224	764.422	1529.25	0	0	0	No	No	Up
Afu1g07450	117.703	99.997	169.113	96.9639	0.00640696	6.09733e-32	9.36758e-09	No	No	No
Afu1g07470	2456.93	2751.78	2981.86	1633.78	1.20418e-21	5.39218e-70	0	No	No	No
Afu1g07480	57.1559	51.1608	87.3329	101.897	45.1	5.15172e-31	2.53208e-90	No	No	No
Afu1g07490	37.9302	20.0802	47.0454	52.3704	1.15811e-53	3.28799e-07	8.70774e-30	No	No	No
Afu1g07500	507.508	153.91	634.171	408.162	1.79178e-238	3.5483e-14	1.27882e-16	No	No	No
Afu1g07510	12.5668	11.4419	18.381	24.7814	1697.32	3.80317e-06	4.19019e-41	No	No	No
Afu1g07520	94.9718	45.0644	105.872	93.8914	8.00793e-84	3.97715	6417.94	No	No	No
Afu1g07530	151.426	87.2666	164.772	120.492	1.14544e-52	47.9369	5.26843e-14	No	No	No
Afu1g07540	274.119	199.775	322.806	210.888	1.08215e-47	2.23402e-14	6.18224e-50	No	No	No
Afu1g07550	41.494	7.69975	30.0965	15.7614	1.30061e-93	0.000338594	3.27327e-68	Down	No	No
Afu1g07555	32.4552	3.56347	28.4541	5.40442	2.87114e-127	175.424	5.89108e-175	Down	No	Down
Afu1g07560	7.45392	3.37663	7.23546	9.4155	0.0871344	8637.62	527.609	No	No	No
Afu1g07570	16.9513	12.2345	22.7534	23.1089	12.7926	7.88878	0.257119	No	No	No
Afu1g07580	23.3797	13.312	32.5323	33.3991	5.54104e-07	0.0211164	1.02532e-05	No	No	No
Afu1g07590	55.591	47.6545	65.7476	55.0395	0.0362001	0.000519125	6929.91	No	No	No
Afu1g07600	30.095	17.0497	26.1032	33.4074	6.37618e-14	175.96	274.186	No	No	No
Afu1g07610	96.926	42.1302	115.095	56.4171	6.42319e-102	0.000106544	1.41083e-74	No	No	No
Afu1g07620	13.5228	19.1774	18.7888	26.641	2.3339e-06	3.01483e-05	6.00358e-51	No	No	No
Afu1g07625	113.917	66.1255	106.705	85.7197	9.4215e-88	61.1079	3.49862e-39	No	No	No
Afu1g07630	467.608	573.916	502.783	689.676	5.95744e-21	4.20914	1.45933e-125	No	No	No
Afu1g07640	66.2736	123.304	71.5298	60.2041	8.20931e-130	81.3172	1.01368	No	No	No
Afu1g07650	139.194	49.251	180.948	117.464	3.76898e-161	4.48614e-17	2.34085e-07	No	No	No
Afu1g07660	35.381	17.1557	36.5456	33.7009	3.62031e-62	3529.65	996.001	No	No	No
Afu1g07670	73.3538	84.2547	96.1707	78.1604	0.000178324	8.2212e-26	24.2868	No	No	No
Afu1g07680	93.8475	110.243	98.4788	71.6459	0.00320005	1379.78	4.37616e-17	No	No	No
Afu1g07690	74.7599	127.702	66.6177	199.444	6.02198e-123	0.10596	0	No	No	No
Afu1g07700	74.1852	48.5952	92.8535	89.5506	9.21967e-36	3.64893e-12	5.33944e-12	No	No	No
Afu1g07710	59.1691	50.6392	75.8516	56.6899	1.10891	1.14588e-07	1807.17	No	No	No
Afu1g07720	163.887	151.956	166.85	133.689	0.00448484	2184.61	1.1831e-53	No	No	No
Afu1g07730	67.9367	33.557	81.2212	38.2447	6.97974e-45	0.0471588	1.4678e-48	No	No	No
Afu1g07740	79.7587	57.8706	90.19	79.3982	1.10922e-14	1.78525	8478.05	No	No	No
Afu1g07750	259.523	411.62	238.229	194.47	1.81094e-154	0.129322	1.75487e-61	No	No	No
Afu1g08760	169.227	130.356	187.337	163.201	1.233e-20	0.138725	679.103	No	No	No
Afu1g08767	95.0726	62.6657	103.938	92.4041	1.83886e-54	1.04144	1421.05	No	No	No
Afu1g08780	6.83876	6.11698	6.83398	4.42157	2856.4	9784	0.0243281	No	No	No
Afu1g08790	158.826	163.413	200.859	221.135	482.02	6.7492e-61	3.23694e-183	No	No	No
Afu1g08795	41.1785	45.2417	45.6977	45.9798	58.2047	23.3613	1.08102	No	No	No
Afu1g08800	26.5354	12.1256	31.694	18.8342	1.4971e-32	3.20169	5.25658e-10	No	No	No
Afu1g08810	55.2499	60.2873	71.1559	98.4507	35.2066	1.31385e-14	1.0538e-140	No	No	No
Afu1g08820	129.109	91.2514	146.043	128.105	8.81188e-14	6.67781	7868.35	No	No	No
Afu1g08830	76.5129	74.0649	80.6937	77.0269	2774.71	722.91	7773.08	No	No	No
Afu1g08840	297.212	197.528	433.756	337.597	4.19646e-54	1.00944e-67	1.00292e-07	No	No	No
Afu1g08850	344.843	156.483	442.592	725.55	1.01863e-305	3.42783e-48	0	No	No	No
Afu1g08860	73.5179	44.8156	79.3118	73.2184	1.17717e-15	1146.46	8998.56	No	No	No
Afu1g08870	34.0499	29.0553	43.4842	35.8721	0.0340892	3.81076e-11	544.313	No	No	No
Afu1g08880	625.28	350.173	829.601	863.393	1.72406e-74	3.39908e-25	2.20739e-49	No	No	No
Afu1g08890	50.6021	30.9725	53.893	82.4311	8.99891e-12	2360.05	8.66516e-29	No	No	No
Afu1g08900	63.6657	41.2828	83.4861	67.0117	3.53256e-41	2.20175e-21	250.628	No	No	No
Afu1g08910	28.1011	34.2905	35.0666	38.3417	0.0185591	0.00102482	1.16244e-15	No	No	No
Afu1g08920	36.6945	28.3001	45.2544	34.321	1.27654e-10	3.62005e-08	117.241	No	No	No
Afu1g08930	60.6724	68.47	67.957	65.8715	5.36082	12.2276	53.986	No	No	No
Afu1g08940	47.4858	44.2309	50.2934	49.0031	445.394	950.079	2732.24	No	No	No
Afu1g08950	30.6661	27.6963	37.4794	30.5232	1785.02	49.7753	9062.73	No	No	No
Afu1g08960	255.704	318.254	327.35	466.269	2.02064e-11	2.23661e-15	1.52282e-169	No	No	No
Afu1g08970	36.736	69.6004	34.4163	70.5065	5.95913e-52	1735.71	8.04659e-76	No	No	No
Afu1g08980	99.6964	74.0212	93.7745	81.8001	5.5742e-15	535.089	1.90804e-09	No	No	No
Afu1g08990	29.9185	62.9228	32.1867	37.1442	2.41014e-56	1713.83	0.00610639	No	No	No
Afu1g09000	46.5912	90.6748	40.1936	38.1892	3.62933e-38	137.919	0.602903	No	No	No
Afu1g09010	205.543	493.254	233.848	244.606	0	6.41651e-12	1.11895e-35	No	No	No
Afu1g09020	61.99	273.055	93.6489	105.112	0	8.48306e-26	1.68329e-65	Up	No	No
Afu1g09030	2302.33	40.9586	2750.42	1240.47	0	7.67545e-67	0	Down	No	No
Afu1g09040	22.5606	18.1422	24.3131	31.206	5.90482e-05	325.387	1.52009e-27	No	No	No
Afu1g09050	53.2789	79.44	73.4848	111.26	9.58581e-10	4.16109e-05	4.3851e-64	No	No	No
Afu1g09060	43.5061	49.8914	54.266	42.3234	4.50468	7.76889e-05	3981.48	No	No	No
Afu1g09070	31.7165	23.493	29.081	39.8557	1.42283e-16	47.0088	1.16068e-17	No	No	No
Afu1g09080	27.9829	18.0399	33.1525	25.1107	1.10108e-21	0.031563	6.89294	No	No	No
Afu1g09090	26.001	16.3975	27.3185	30.3369	0.000299616	4979.23	105.387	No	No	No
Afu1g09100	811.182	2837.7	801.008	1248.12	0	4000.89	2.69955e-298	No	No	No
Afu1g09110	28.907	18.3787	23.4603	18.6639	9.29927e-15	0.162359	5.37315e-22	No	No	No
Afu1g09120	58.06	8.79139	43.0593	19.3744	7.67727e-266	5.8768e-12	7.01849e-209	Down	No	No
Afu1g09130	29.6984	15.1273	22.3078	17.3361	1.28305e-40	8.00937e-07	5.86639e-42	No	No	No
Afu1g09140	68.4112	21.5755	65.1206	51.2583	1.56703e-174	1123.38	1.23841e-22	No	No	No
Afu1g09150	25.3339	21.2342	33.6483	32.7933	7.45572	1.61694e-05	8.20031e-07	No	No	No
Afu1g09160	52.749	92.3969	45.8012	71.1139	2.37832e-17	443.89	0.000189037	No	No	No
Afu1g09170	110.319	54.7503	111.158	131.849	3.15589e-89	7883.69	1.77388e-10	No	No	No
Afu1g09180	28.3879	32.7243	28.6263	46.0205	46.9324	8571.3	1.17466e-30	No	No	No
Afu1g09190	71.1921	47.4408	68.3895	90.4142	1.27012e-21	2559.51	1.17034e-13	No	No	No
Afu1g09200	22.7909	64.5046	31.4457	26.2294	1.80385e-192	8.72541e-11	1.05783	No	No	No
Afu1g09210	27.7532	68.5108	26.9559	33.3586	6.36904e-163	4734.99	0.00018656	No	No	No
Afu1g09220	49.8746	39.7115	66.9421	47.6789	1.99134	0.000536874	3457.07	No	No	No
Afu1g09230	63.9026	42.9912	62.4907	49.8685	1.11533e-06	6788.6	0.00331528	No	No	No
Afu1g09240	46.1666	27.4463	56.5344	48.3044	2.77401e-35	1.40329e-05	1170.52	No	No	No
Afu1g09250	114.387	207.441	114.217	162.101	3.04594e-127	9453.53	2.55818e-53	No	No	No
Afu1g09260	4.13032	5.93401	3.74433	2.62408	448.642	6060.33	89.6849	No	No	No
Afu1g09270	27.6688	11.0563	21.5949	8.95121	2.59927e-78	1.19561e-05	7.5305e-175	No	No	No
Afu1g09280	137.759	154.266	127.932	164.002	0.0252787	32.8385	1.65314e-14	No	No	No
Afu1g09290	59.7809	55.7196	78.8539	91.5693	505.71	7.22801e-13	3.42182e-52	No	No	No
Afu1g09300	2.73368	1.31616	4.15245	3.14183	11.7032	166.835	4123.22	No	No	No
Afu1g09310	42.8697	12.5472	48.5901	20.4069	2.87879e-90	38.9448	7.66462e-64	No	No	No
Afu1g09320	29.6324	59.1827	35.3802	24.1607	1.71195e-84	0.0664075	7.95125e-05	No	No	No
Afu1g09330	89.1822	270.004	87.3347	163.161	0	5340.19	9.97008e-123	No	No	No
Afu1g09340	6.26012	8.5063	8.48687	4.75975	943.9	937.618	1062.17	No	No	No
Afu1g09350	133.743	193.794	151.621	151.834	2.36115e-37	0.187166	0.00210229	No	No	No
Afu1g09360	92.2814	63.277	155.147	115.396	0.0255533	1.22995e-11	1.39035	No	No	No
Afu1g09370	13.5273	32.2174	16.1678	16.4046	4.57086e-75	10.676	0.234405	No	No	No
Afu1g09380	31.8737	65.8651	41.7266	42.3002	8.48964e-27	1.36788	0.0170174	No	No	No
Afu1g09390	40.076	43.6205	55.6226	44.6789	1141.21	9.60026e-07	149.361	No	No	No
Afu1g09400	38.7179	51.1955	40.8507	53.6537	1.0329e-13	1191.69	3.46403e-29	No	No	No
Afu1g09410	68.2527	99.5876	100.543	73.9733	2.34307e-11	4.39749e-12	607.022	No	No	No
Afu1g09420	76.3647	12.1057	78.5317	38.9418	1.08819e-76	6502.01	3.80295e-26	Down	No	No
Afu1g09430	32.8584	23.1017	28.778	41.2441	0.00966722	536.628	0.154642	No	No	No
Afu1g09440	927.302	3321.4	996.178	1487.99	0	0.0850796	4.28818664722173e-316	No	No	No
Afu1g09450	67.5237	172.685	65.3962	73.4106	6.91028e-245	3602.52	34.7706	No	No	No
Afu1g09460	43.516	29.5464	56.2059	70.9627	1.22027e-14	1.22513e-07	5.97802e-55	No	No	No
Afu1g09470	97.2998	48.0687	102.716	102.329	3.07172e-78	768.882	493.323	No	No	No
Afu1g09480	62.9555	53.8573	67.1585	67.0333	51.3125	2214.3	1557.26	No	No	No
Afu1g09490	155.123	199.151	219.249	177.839	3.28218e-10	8.22181e-23	0.0140914	No	No	No
Afu1g09500	57.217	67.0774	62.7117	98.8669	3.03951e-05	7.78118	2.51741e-149	No	No	No
Afu1g09510	153.075	99.1916	226.851	171.255	4.03184e-21	3.2525e-26	2.67295	No	No	No
Afu1g09520	43.0463	20.2122	47.1814	17.9769	3.87696e-38	430.863	1.1604e-77	No	No	No
Afu1g09530	54.0279	39.2466	36.8226	58.9267	1.98096e-18	1.56215e-26	5.00828	No	No	No
Afu1g09540	50.1988	24.4544	58.4605	47.9925	2.4791e-11	397.914	4673.53	No	No	No
Afu1g09550	117.309	48.226	127.119	230.883	2.30587e-50	792.051	2.51393e-86	No	No	No
Afu1g09560	57.8531	49.2115	70.3324	221.355	0.853725	0.00240369	0	No	No	No
Afu1g09570	20.9853	18.5461	14.3329	19.7148	207.441	2.17548e-07	1479.63	No	No	No
Afu1g09580	82.5411	77.6772	80.9425	35.7098	1037.37	5891.54	4.96876e-115	No	No	No
Afu1g09590	93.5844	93.8546	111.596	67.6653	9101.92	3.57752e-06	3.74817e-32	No	No	No
Afu1g09600	143.652	99.6919	186.554	111.892	1.8676e-22	1.05437e-14	8.34938e-16	No	No	No
Afu1g09610	67.1168	96.5967	75.9335	65.0537	4.93508e-43	0.0437797	1706.03	No	No	No
Afu1g09620	34.8457	45.2366	38.4937	40.7724	2.96643e-10	53.9314	0.000998945	No	No	No
Afu1g09630	71.83	74.0246	65.9706	89.2512	1623.39	1.36777	8.84328e-32	No	No	No
Afu1g09640	26.9133	30.9472	33.8127	58.4435	0.514547	1.71145e-07	2.81946e-201	No	No	No
Afu1g09650	25.1271	21.6084	42.0255	26.1115	149.985	2.49028e-18	4397.79	No	No	No
Afu1g09660	103.316	38.2522	119.382	104.847	1.25553e-114	0.102732	6015.35	No	No	No
Afu1g09670	476.317	198.598	452.755	130.215	0	0.465217	0	No	No	No
Afu1g09680	266.373	145.657	206.938	210.951	2.69868e-93	2.10826e-17	6.26288e-23	No	No	No
Afu1g09690	23.0751	117.245	27.6594	18.6691	0	0.134805	0.00015487	Up	No	No
Afu1g09700	88.5114	328.73	94.1647	84.4448	0	1457.99	1904.68	No	No	No
Afu1g09710	30.1749	103.573	45.7086	37.1853	9.76754e-36	2.98334	433.021	No	No	No
Afu1g09720	50.592	31.6678	61.2892	40.4788	2.03807e-11	1.56199	0.0108055	No	No	No
Afu1g09730	63.047	78.3363	73.5763	52.902	0.000140541	0.745952	0.00393163	No	No	No
Afu1g09750	68.6697	27.0786	54.7277	22.7177	3.64111e-69	0.00195404	1.87069e-146	No	No	No
Afu1g09754	272.928	67.9241	317.247	55.1762	8.52821e-266	0.000438787	0	Down	No	Down
Afu1g09757	73.0097	45.2305	112.318	58.7852	1.72842e-05	2.03603e-07	4.03468	No	No	No
Afu1g09760	22.5865	26.1737	21.012	30.0125	4.79147	1017.61	1.12169e-12	No	No	No
Afu1g09770	35.0717	86.5638	41.3792	57.5531	8.35038e-207	0.0210371	1.22411e-69	No	No	No
Afu1g09780	48.9558	71.1309	65.1799	74.3267	2.33681e-19	8.61862e-10	2.38733e-36	No	No	No
Afu1g09790	15.4353	17.0209	14.3126	15.795	352.707	1181.11	5591.76	No	No	No
Afu1g09800	203.099	317.972	208.058	315.847	5.13409e-118	2524.75	3.05944e-160	No	No	No
Afu1g09810	263.5	613.012	281.622	3529.75	1.17857e-307	139.234	0	No	No	Up
Afu1g09820	23.8438	9.75003	24.2679	28.7653	6.18415e-78	6381.65	5.51399e-06	No	No	No
Afu1g09830	145.912	147.978	137.307	236.324	5915.49	244.499	8.36939e-123	No	No	No
Afu1g09840	34.9994	102.582	61.5742	42.2353	2.87234e-208	4.46675e-43	0.00178358	No	No	No
Afu1g09850	57.7233	47.1349	73.6524	45.4035	5.68688	0.0449167	0.00888292	No	No	No
Afu1g09870	19.5998	19.0364	17.8618	19.9047	4391.57	154.669	6170.07	No	No	No
Afu1g09880	14.4261	10.8712	16.2229	7.19375	9.21632	1300.26	3.58143e-16	No	No	No
Afu1g09890	1943.7	1300.23	1611.19	578.494	8.31022e-126	1.52669e-28	0	No	No	No
Afu1g09900	23.9089	17.1542	20.3583	17.8176	0.000265042	51.2697	1.23932e-05	No	No	No
Afu1g09910	13.9089	10.5475	16.1467	11.2503	3.49965	343.067	6.7976	No	No	No
Afu1g09920	32.1173	37.2518	34.2832	30.2236	233.265	3292.05	2817.1	No	No	No
Afu1g09930	40.2496	57.6393	45.2757	93.491	1.35613e-10	180.273	2.85595e-120	No	No	No
Afu1g09940	635.87	774.89	676.667	470.122	4.31778e-73	0.000162468	4.98704e-203	No	No	No
Afu1g09950	101.477	115.947	119.694	193.564	0.77128	0.00861304	1.15458e-138	No	No	No
Afu1g09960	50.4286	21.6035	62.0025	44.5706	9.1357e-41	0.11062	31.2761	No	No	No
Afu1g09970	119.61	399.144	109.39	216.624	0	24.1271	2.37807e-168	No	No	No
Afu1g09980	15.4446	15.8463	13.415	14.5574	7594.72	946.695	3755.71	No	No	No
Afu1g10012	47.7415	26.547	48.7624	79.0646	4.53838e-142	2801.91	1.62133e-247	No	No	No
Afu1g10020	1016.82	1365.7	844.49	2944.85	1.12661e-172	1.07033e-52	0	No	No	No
Afu1g10030	57.3238	849.727	40.6063	634.599	0	1.74689e-14	0	Up	No	Up
Afu1g10040	124.339	80.6007	167.269	64.2775	1.58972e-43	5.52201e-28	7.62324e-144	No	No	No
Afu1g10050	52.5025	57.8289	55.3521	59.5524	0.398297	259.401	1.09061e-06	No	No	No
Afu1g10060	61.4275	38.4629	104.856	135.075	1.43223e-07	1.1101e-18	4.9736e-68	No	No	No
Afu1g10080	196.188	255.046	226.323	539.646	1.89744e-50	2.28596e-12	0	No	No	No
Afu1g10090	50.4657	16.8226	66.8943	42.5449	1.05039e-40	0.00658479	9.54028	No	No	No
Afu1g10100	31.5591	31.9518	36.4786	20.8028	8409.29	120.093	6.13902e-11	No	No	No
Afu1g10110	133.239	24.8581	135.736	93.2322	8.80562e-282	5432.83	6.60025e-34	Down	No	No
Afu1g10120	25.263	11.8201	21.4803	26.115	4.70828e-24	71.0222	4975.55	No	No	No
Afu1g10130	1044.31	652.332	977.54	875.896	0	1.61529e-09	2.18102e-115	No	No	No
Afu1g10140	688.235	76.0421	476.04	282.682	0	6.50002e-130	0	Down	No	No
Afu1g10150	3923.27	348.047	3118.22	327.317	0	4.57272e-305	0	Down	No	Down
Afu1g10160	75.9259	14.7846	70.4446	9.53617	2.99911e-178	550.463	0	Down	No	Down
Afu1g10170	46.66	19.7586	42.6361	6.29939	3.64714e-43	676.246	3.83703e-247	No	No	Down
Afu1g10180	3.32249	2.49015	7.1231	4.34098	1862.19	0.0762833	1109.21	No	No	No
Afu1g10190	35.5964	60.792	36.8495	42.1195	5.0292e-39	4330.44	0.0236818	No	No	No
Afu1g10200	30.5171	42.3541	34.0443	36.8473	2.83583e-13	75.946	0.000209425	No	No	No
Afu1g10210	15.0322	14.0154	13.8501	29.6492	2284.15	1574.37	1.43378e-56	No	No	No
Afu1g10220	90.4603	110.024	109.917	202.956	1.29379e-14	2.31003e-14	0	No	No	No
Afu1g10230	30.6143	15.9405	25.1026	23.7661	2.08967e-09	127.338	1.22199	No	No	No
Afu1g10240	13.1798	7.22374	14.0391	8.58944	36.9263	7761.01	65.827	No	No	No
Afu1g10250	1.15357	10.4007	3.12779	2.23259	0.000357874	921.545	2896.59	Up	No	No
Afu1g10260	141.238	25.6274	202.333	89.251	2.09502e-244	4.99559e-27	1.12971e-46	Down	No	No
Afu1g10270	84.8284	15.1261	83.5976	30.9292	1.89977e-212	6854.32	7.53933e-162	Down	No	No
Afu1g10280	25.9538	28.7299	32.4663	30.5618	829.607	0.948358	8.09101	No	No	No
Afu1g10295	19.2602	22.1634	22.2779	21.8186	0.204472	0.103165	0.0679751	No	No	No
Afu1g10310	73.0361	287.147	74.6449	146.035	0	4403.51	7.11625e-242	No	No	No
Afu1g10320	52.0567	71.4671	59.4588	40.7092	9.52057e-27	0.0379614	1.79347e-17	No	No	No
Afu1g10330	39.0934	37.0192	43.3227	64.5689	1782.44	82.5655	5.51943e-59	No	No	No
Afu1g10340	210.459	185.459	197.937	138.214	0.0230374	200.973	4.43075e-68	No	No	No
Afu1g10350	271.672	332.388	311.669	704.732	2.03602e-28	2.16436e-11	0	No	No	No
Afu1g10355	517.746	1070.08	748.552	960.574	5.54115e-193	4.21464e-40	4.12093e-183	No	No	No
Afu1g10360	52.2331	83.2328	48.0022	55.4893	9.18449e-60	75.9518	175.331	No	No	No
Afu1g10370	7.16654	22.0805	8.44104	17.7601	2.84766e-50	752.726	3.19944e-39	No	No	No
Afu1g10380	7.75708	5.35876	9.41129	49.6868	3.08507e-31	1.41698e-09	0	No	No	Up
Afu1g10390	7.75515	24.3167	10.9675	185.127	1.16101e-152	2.80502e-07	0	No	No	Up
Afu1g10400	14.9439	11.3593	12.0477	17.1508	2.37749e-05	0.0204428	0.78117	No	No	No
Afu1g10410	47.288	58.3447	63.0858	55.3859	0.0240143	4.77866e-07	0.291233	No	No	No
Afu1g10420	41.2584	9.6506	34.9328	21.2031	1.18653e-67	55.6211	1.03566e-30	Down	No	No
Afu1g10430	147.706	69.2924	211.634	173.456	7.73235e-81	1.29058e-29	7.35595e-06	No	No	No
Afu1g10440	22.7021	79.255	26.8457	17.7207	4.99105e-270	2.83191	2.68583e-05	No	No	No
Afu1g10450	21.0083	15.0616	19.7061	21.3547	9.61186e-08	1636.97	6671.78	No	No	No
Afu1g10460	64.3092	47.7168	79.4293	108.024	0.165455	6.42193	1.13628e-22	No	No	No
Afu1g10470	35.4636	68.1479	38.0912	68.976	2.42712e-89	513.773	5.04121e-129	No	No	No
Afu1g10480	13.8059	19.0864	17.3741	14.1152	0.000108274	0.770157	6725.32	No	No	No
Afu1g10490	26.0344	25.0255	38.2278	23.3725	5190.45	1.30472e-07	396.694	No	No	No
Afu1g10497	94.8354	146.987	126.551	120.495	1.34704e-28	4.85864e-10	1.78795e-09	No	No	No
Afu1g10510	614.822	2211.81	613.882	1113.84	0	9159.76	0	No	No	No
Afu1g10525	34.8474	16.4676	30.8951	19.4471	1.3695e-76	4.00332	1.31204e-76	No	No	No
Afu1g10540	26.7018	32.4196	25.5603	23.7569	0.149353	3577.08	33.5782	No	No	No
Afu1g10550	34.8163	39.9881	31.2666	25.8004	196.814	859.683	0.000285763	No	No	No
Afu1g10560	47.269	147.393	42.1173	52.0627	0	27.3976	15.6154	No	No	No
Afu1g10570	40.0053	69.6461	54.7185	65.7843	1.1186e-20	0.000532856	1.06155e-22	No	No	No
Afu1g10580	184.634	93.9772	173.486	67.7335	8.34735e-254	2.57982	0	No	No	No
Afu1g10590	31.5717	21.8997	30.7499	36.4342	3.61644e-05	6337.73	18.6944	No	No	No
Afu1g10600	66.4339	48.6457	63.3187	68.8491	4.27997e-22	831.349	1142.13	No	No	No
Afu1g10610	238.339	114.74	345.527	124.379	1.96969e-92	5.17013e-39	2.84727e-117	No	No	No
Afu1g10620	15.4117	7.56985	14.7584	11.3079	6.42722e-29	3927.51	2.69299e-08	No	No	No
Afu1g10630	797.501	610.77	668.181	716.08	1.44784e-114	3.03941e-51	8.12116e-28	No	No	No
Afu1g10640	38.1658	46.0661	40.1954	43.3334	5.67127	3616.47	61.4373	No	No	No
Afu1g10645	71.4353	113.071	79.4009	76.1275	8.48327e-18	422.306	1506.34	No	No	No
Afu1g10650	24.3138	11.0552	27.2882	33.9206	2.62065e-61	19.3577	5.22613e-25	No	No	No
Afu1g10660	26.7059	41.6237	31.9706	33.23	6.59789e-18	2.75494	0.000952396	No	No	No
Afu1g10670	80.1116	97.0521	89.2919	117.404	5.92846e-07	3.04152	9.61504e-55	No	No	No
Afu1g10690	38.2728	67.3152	33.6376	34.6449	2.35827e-82	1.42874	3.39198	No	No	No
Afu1g10700	95.5818	117.515	108.241	183.98	0.000394505	11.803	4.85349e-111	No	No	No
Afu1g10710	52.1367	109.013	70.8565	49.6292	3.90397e-108	3.90799e-13	1284.88	No	No	No
Afu1g10720	13.3182	7.90486	11.0502	10.7485	2.60405e-11	23.1182	0.208213	No	No	No
Afu1g10730	10.0553	2.84491	7.52864	4.01954	3.51586e-36	1.38273	1.57939e-35	No	No	No
Afu1g10740	86.4789	82.7714	90.6547	87.4421	3701.17	3201.33	7776.66	No	No	No
Afu1g10750	17.8762	11.4513	39.8548	16.973	1.25155e-08	2.31784e-62	2654.79	No	No	No
Afu1g10760	23.0146	68.9731	25.2259	23.4587	3.04031108788932e-312	129.777	5438.31	No	No	No
Afu1g10770	24.2661	17.3871	19.7881	46.8025	0.000207216	3.9293	8.55152e-57	No	No	No
Afu1g10780	27.8488	12.3495	22.847	11.3411	3.34336e-34	2.7004	4.01374e-65	No	No	No
Afu1g10790	22.2861	6.19455	32.9755	103.1	1.37281e-97	1.9794e-18	0	No	No	Up
Afu1g10800	20.4758	44.1638	34.4193	65.496	1.31225e-30	7.95834e-11	6.17903e-119	No	No	No
Afu1g10810	116.273	71.3437	140.414	131.698	1.08785e-49	2.92227e-08	0.000519366	No	No	No
Afu1g10820	253.919	62.6242	169.099	110.105	0	9.77235e-42	1.42001e-234	Down	No	No
Afu1g10830	20.8678	5.06753	17.7313	9.78499	1.21173e-84	20.826	1.29027e-50	Down	No	No
Afu1g10840	87.2537	41.5293	134.073	91.4899	3.91097e-38	2.45506e-21	2079.25	No	No	No
Afu1g10850	191.471	261.916	267.466	369.979	5.35369e-10	8.77722e-12	2.15681e-86	No	No	No
Afu1g10860	30.1309	35.3736	33.335	43.2057	0.00803485	21.9428	2.84866e-39	No	No	No
Afu1g10870	65.6029	6.40789	54.7407	39.7839	8.89821e-179	2.12732	8.13974e-28	Down	No	No
Afu1g10880	24.4052	14.1657	19.5374	12.781	7.39645e-46	5.96556e-07	5.11452e-97	No	No	No
Afu1g10890	54.791	10.0294	57.3365	26.064	8.3364e-212	2064.04	8.1335e-98	Down	No	No
Afu1g10900	55.5705	31.675	59.0936	52.2335	3.96405e-33	1079.87	550.661	No	No	No
Afu1g10910	458.009	269.386	502.433	790.253	5.07725e-279	3.86642e-09	0	No	No	No
Afu1g10920	83.3511	39.4378	83.9183	74.4879	1.24369e-75	8243.07	0.643943	No	No	No
Afu1g10930	67.3996	341.335	114.011	669.118	0	1.00712e-66	0	Up	No	Up
Afu1g10940	29.783	24.5829	26.4973	68.4236	4.28909e-06	1.10323	0	No	No	No
Afu1g10950	220.471	100.536	247.52	252.637	7.905e-184	0.00100528	4.18684e-10	No	No	No
Afu1g10960	189.963	393.703	235.07	189.603	3.26538e-131	1.81085e-06	9215.34	No	No	No
Afu1g10970	115.38	147.157	127.231	129.308	5.79961e-42	0.000355412	1.04776e-10	No	No	No
Afu1g10980	29.5807	16.6121	30.941	15.3412	1.6042e-20	3601.92	2.09994e-41	No	No	No
Afu1g10990	17.9006	67.3769	23.161	22.4504	1.62789e-114	5.70507	3.40873	No	No	No
Afu1g11000	15.7942	6.98734	17.0381	15.4019	8.06942e-32	1521.41	5608.91	No	No	No
Afu1g11010	25.0086	9.65486	25.4282	34.3995	2.68447e-20	8345.8	0.000452585	No	No	No
Afu1g11020	17.0063	1.92031	13.5271	2.36513	5.27112e-60	51.9909	3.17641e-95	Down	No	Down
Afu1g11030	20.3159	1.59571	19.9519	3.39673	3.80886e-89	7927.77	2.68356e-107	Down	No	Down
Afu1g11040	19.886	11.9615	38.4483	41.5249	0.00209054	6.532e-15	2.08621e-28	No	No	No
Afu1g11050	18.3389	8.52662	12.8825	8.58529	2.02883e-21	0.00121233	5.77439e-34	No	No	No
Afu1g11060	29.9918	31.1715	35.8428	72.5072	5270.04	30.1847	1.23925e-88	No	No	No
Afu1g11070	25.1281	30.4613	28.0559	36.2133	0.0547832	109.816	1.44364e-22	No	No	No
Afu1g11080	30.3798	19.2113	33.3657	37.076	7.27104e-31	41.3795	8.36584e-10	No	No	No
Afu1g11090	19.0047	17.6947	15.8316	16.6033	2458.16	42.7101	87.0161	No	No	No
Afu1g11100	25.273	16.6992	23.1137	24.3271	0.343852	3452.4	6061.76	No	No	No
Afu1g11110	31.5998	25.6663	29.1954	25.7018	1.47371e-13	8.18147	7.61544e-21	No	No	No
Afu1g11120	116.68	127.191	130.497	154.802	18.7315	0.506983	5.15202e-33	No	No	No
Afu1g11130	714.82	2832.71	776.94	1208.27	0	0.000892752	0	No	No	No
Afu1g11140	34.3828	38.3709	30.8995	30.5379	414.083	590.445	112.842	No	No	No
Afu1g11150	45.0134	40.9869	47.8457	76.9557	508.863	1855.23	3.85293e-49	No	No	No
Afu1g11160	16.2448	52.0878	20.5278	16.4423	7.77315e-152	0.226653	8112.59	No	No	No
Afu1g11170	4.04096	4.84017	3.89401	7.57554	746.362	7363.13	2.12488e-12	No	No	No
Afu1g11180	19.1672	15.0619	44.0489	30.3237	0.0288483	1.95174e-92	2.09074e-31	No	No	No
Afu1g11190	1115.12	3177.4	1004.96	1741.79	0	2.06723e-13	0	No	No	No
Afu1g11200	70.9758	40.3781	82.5993	89.5235	9.57003e-18	23.7649	0.000142673	No	No	No
Afu1g11210	10.3821	5.08969	12.7346	5.16686	79.6738	3413.73	10.0373	No	No	No
Afu1g11220	4346.2	1174.71	4769.81	2748.09	0	3.17166e-33	0	No	No	No
Afu1g11230	7.58934	0.975511	5.77491	0.668908	8.03889e-75	1.45537	4.10692e-161	Down	No	Down
Afu1g11240	0.990765	0.506827	1.53507	0.292192	6442.87	7241.29	1146.16	No	No	No
Afu1g11250	125.387	63.869	95.7935	98.1933	1.60401e-112	8.14013e-20	3.71171e-25	No	No	No
Afu1g11260	1.6715	0.801614	1.13303	0.970495	2574.26	4408.53	2182.39	No	No	No
Afu1g11270	15.8535	0.52763	9.49966	1.58852	4.75742e-120	4.70213e-08	6.64523e-160	Down	No	Down
Afu1g11280	19.128	0.795526	12.0875	1.88038	3.60124e-102	3.4237e-05	2.78655e-143	Down	No	Down
Afu1g11290	3.71244	2.43751	2.81668	1.1005	51.7357	572.531	8.9114e-14	No	No	No
Afu1g11300	9.98287	1.34192	7.05621	4.49674	9.1074e-24	49.3465	4.22229e-09	Down	No	No
Afu1g11310	2.15371	0.646668	0.677052	1.50506	0.000210504	0.000514863	110.451	No	No	No
Afu1g11320	2.54245	0.940608	0.984803	2.17913	0.113808	0.229979	3002.45	No	No	No
Afu1g11330	0.785754	0.531997	0.75194	0.848544	2819.33	9784	8773.33	No	No	No
Afu1g11340	0.23763	0.54702	0.184089	0.394205	954.522	7568.8	2733.62	No	No	No
Afu1g11350	0.843573	0.0882677	0.831734	0.932935	0.0546053	9784	7194.58	No	No	No
Afu1g11360	2.61023	1.06821	2.83096	1.07772	3.47479	6839.92	0.0533696	No	No	No
Afu1g11370	3.28956	1.39087	2.99044	2.04175	0.00258051	4799.32	0.883846	No	No	No
Afu1g11380	13.035	3.95917	21.837	38.5263	1.81964e-21	1.29611e-07	5.78964e-76	No	No	No
Afu1g11390	60.463	25.7876	45.4319	49.0475	6.46982e-95	5.83148e-12	2.0219e-09	No	No	No
Afu1g11400	23.97	18.5537	24.3078	15.9055	8.00026	8393.69	2.3591e-06	No	No	No
Afu1g11410	11.2904	14.5369	10.859	12.5922	19.4983	6470.54	1274.9	No	No	No
Afu1g11420	107.591	94.0648	102.156	159.67	8.19697e-13	10.4641	1.94108e-233	No	No	No
Afu1g11430	1.04468	2.56517	1.13303	1.94099	781.553	9784	2483.25	No	No	No
Afu1g11440	20.5148	15.4423	17.8263	17.4517	0.0478833	196.708	10.6474	No	No	No
Afu1g11450	20.4463	20.5187	22.5136	45.2637	8876.55	7.40235	0	No	No	No
Afu1g11460	235.673	428.117	294.957	770.991	1.47063e-203	5.14102e-22	0	No	No	No
Afu1g11470	176.554	290.896	235.68	223.008	2.04239e-66	2.14136e-18	1.82294e-16	No	No	No
Afu1g11480	1017.25	276.209	1029.74	524.745	0	3919.54	0	No	No	No
Afu1g11490	85.3515	95.0894	76.9714	221.947	0.106459	0.640297	0	No	No	No
Afu1g11500	16.9643	14.1936	24.7131	42.9049	172.21	0.000122583	1.56451e-74	No	No	No
Afu1g11510	19.0041	16.1535	18.1921	26.7493	428.369	5713.82	0.000136955	No	No	No
Afu1g11520	12.683	4.09345	10.6559	5.61061	2.92726e-42	56.7086	7.78392e-40	No	No	No
Afu1g11530	21.565	9.2487	32.906	32.6664	3.70857e-15	1.62444e-05	2.3535e-08	No	No	No
Afu1g11535	37.8015	32.934	43.0114	78.3861	1599.03	1753.93	5.20005e-22	No	No	No
Afu1g11540	35.6214	54.1678	43.3068	114.159	3.92974e-12	3.41577	1.58273e-211	No	No	No
Afu1g11550	35.0534	47.3189	61.592	118.4	5.74293e-07	4.54066e-35	3.41179363725521e-316	No	No	No
Afu1g11560	4.66394	3.53512	5.33151	6.2525	803.303	3508.13	126.904	No	No	No
Afu1g11570	1.5064	1.24152	1.85853	1.44384	4908	3936.96	8108.9	No	No	No
Afu1g11580	5.27922	3.7326	5.72564	5.21291	45.2391	4647.86	8688.37	No	No	No
Afu1g11590	1.62992	1.71968	3.9064	4.45011	8883.71	0.0557996	4.67876e-06	No	No	No
Afu1g11600	16.1456	7.21501	17.971	4.92577	8.25793e-12	1832.28	1.8777e-39	No	No	No
Afu1g11610	16.2722	13.2144	18.2785	21.4751	1061.76	3394.86	45.165	No	No	No
Afu1g11620	18.5774	9.50329	18.331	21.8651	9.08743e-31	7627.85	0.137689	No	No	No
Afu1g11630	19.0782	14.0094	17.2028	23.9746	2.77569e-06	258.349	2.47242e-06	No	No	No
Afu1g11640	63.9178	8.35123	25.1511	11.1388	4.02033e-132	3.96804e-45	1.00053e-190	Down	No	Down
Afu1g11650	8.08515	3.25329	5.52509	8.17833	6.05772e-14	0.430982	8693.22	No	No	No
Afu1g11660	25.2476	20.9811	31.1575	33.998	0.258427	0.00164602	1.86648e-15	No	No	No
Afu1g11670	39.9175	42.6912	52.8745	45.793	4714.82	19.5743	820.325	No	No	No
Afu1g11690	41.4456	31.63	40.282	32.2987	6.84602e-05	5103.64	6.10546e-07	No	No	No
Afu1g11700	18.5532	17.482	17.9476	15.2135	3815.11	6183.5	6.99696	No	No	No
Afu1g11710	612.02	2532.39	609.9	1079.89	0	8183.1	0	Up	No	No
Afu1g11715	6.05127	1.67375	8.01294	0.887119	5.88096e-07	396.25	7.78114e-25	No	No	Down
Afu1g11720	12.3799	5.62722	14.8499	7.70889	1.63088e-15	91.0465	4.6477e-09	No	No	No
Afu1g11730	1022.68	2135.42	1158.9	1586.4	0	1.87482e-16	0	No	No	No
Afu1g11740	9.96747	26.2058	9.27798	8.49397	2.93651e-21	5383.58	1053.35	No	No	No
Afu1g11760	56.4468	36.0171	68.7889	93.762	2.73859e-20	0.00193614	7.39058e-61	No	No	No
Afu1g11770	121.643	145.178	98.4092	104.658	3.90982e-05	1.27625e-06	0.000195756	No	No	No
Afu1g11780	53.4816	96.4585	47.0347	60.161	1.8718e-57	24.3911	4.39849	No	No	No
Afu1g11790	36.6059	33.4661	24.203	11.8117	438.894	7.70464e-14	6.72269e-136	No	No	No
Afu1g11800	24.571	50.3165	35.0162	26.6077	1.45957e-40	2.51152e-06	1102.63	No	No	No
Afu1g11810	11.7981	10.6036	12.4551	19.023	1194.23	4202.53	3.43891e-17	No	No	No
Afu1g11820	5.43383	0.883607	7.41544	1.86253	1.97906e-23	21.3321	2.87693e-18	Down	No	No
Afu1g11830	13.8111	9.95071	16.3289	14.102	0.233449	162.595	7291.9	No	No	No
Afu1g11840	3.59225	2.20514	3.61773	4.05224	3381.21	9784	8494.46	No	No	No
Afu1g11850	12.3273	19.88	13.947	21.1506	4.18361e-10	740.349	1.76666e-20	No	No	No
Afu1g11860	81.0501	111.618	106.3	111.432	6.29723e-06	0.00219077	2.82453e-09	No	No	No
Afu1g11870	24.0995	36.8495	34.8045	32.0452	2.55041e-16	3.40067e-11	1.00253e-08	No	No	No
Afu1g11880	20.2126	16.7217	22.9778	11.5683	3.49877	94.2386	9.02323e-29	No	No	No
Afu1g11890	37.7344	41.5516	35.0323	57.4136	88.5835	514.174	2.36001e-44	No	No	No
Afu1g11900	119.3	227.091	126.238	92.8754	1.04472e-172	304.334	2.60489e-23	No	No	No
Afu1g11910	170.049	139.489	156.109	20.3067	1.39047e-06	44.5201	0	No	No	Down
Afu1g11920	55.171	30.5296	47.9648	85.3197	4.21152e-64	0.044146	6.11416e-80	No	No	No
Afu1g11930	102.062	50.3747	114.307	129.283	1.14735e-138	0.00735958	5.8307e-33	No	No	No
Afu1g11940	34.9255	61.3052	51.4021	40.5171	2.75282e-25	1.72811e-09	14.4601	No	No	No
Afu1g11950	42.2654	63.7563	68.8858	85.1575	3.2977e-31	1.32558e-46	8.18269e-151	No	No	No
Afu1g11960	31.5933	73.078	37.5028	52.4645	3.80646e-114	0.62486	3.10267e-48	No	No	No
Afu1g11970	63.1876	61.855	71.9934	157.514	3914.93	0.000754598	0	No	No	No
Afu1g11980	54.7852	57.4549	65.5332	46.9532	2566.62	0.0947031	0.180316	No	No	No
Afu1g11990	16.9195	9.01352	22.0403	19.701	6.45973e-09	1.93402	125.428	No	No	No
Afu1g12000	87.9432	130.788	89.1013	142.625	5.29115e-46	6461.12	1.29271e-101	No	No	No
Afu1g12010	54.6654	69.1021	72.5066	51.0348	0.000451088	2.86055e-07	678.728	No	No	No
Afu1g12020	86.7773	69.7096	78.7084	66.123	3.92957e-16	0.25643	7.98617e-39	No	No	No
Afu1g12025	50.8104	33.8964	63.4494	37.0705	0.0608459	41.5148	0.102798	No	No	No
Afu1g12030	48.9097	50.6998	48.8201	81.6643	3614.35	9475.52	3.41301e-63	No	No	No
Afu1g12040	118.106	117.364	151.457	345.634	8249.71	4.4822e-14	0	No	No	No
Afu1g12050	42.4142	22.659	44.3499	75.144	1.49583e-19	3999.75	2.20088e-42	No	No	No
Afu1g12060	19.8063	11.3877	22.7778	29.0496	7.54949e-08	408.074	2.1088e-08	No	No	No
Afu1g12065	97.3441	116.034	172.276	134.496	9.31397	3.5061e-28	7.14856e-10	No	No	No
Afu1g12070	225.583	146.672	248.39	184.633	7.39544e-34	11.2039	1.5995e-10	No	No	No
Afu1g12080	29.834	26.7861	31.5074	35.9047	67.2502	1581.14	3.03538e-05	No	No	No
Afu1g12090	25.6389	12.7657	26.6994	39.8823	1.02849e-22	4672.35	8.27862e-22	No	No	No
Afu1g12100	0.94921	5.98291	1.31311	4.90389	1.33591e-11	4108.25	8.33258e-11	Up	No	Up
Afu1g12110	241.704	200.665	377.766	277.646	0.108536	1.04228e-30	0.23038	No	No	No
Afu1g12120	9.43443	14.5979	11.9068	12.0505	3.97442e-08	4.71663	0.107539	No	No	No
Afu1g12130	90.3911	33.639	104.597	66.483	2.11106e-75	2.70574	3.51675e-13	No	No	No
Afu1g12140	35.8126	34.3808	40.6823	27.0318	5130.86	378.776	0.00333154	No	No	No
Afu1g12150	116.188	61.0196	101.729	104.596	5.30965e-117	0.000534306	0.00146103	No	No	No
Afu1g12160	33.0392	16.1288	46.1365	27.1739	2.91753e-22	2.52305e-06	0.648485	No	No	No
Afu1g12170	198.072	309.494	347.281	251.928	1.93093e-127	9.93807e-214	3.01873e-46	No	No	No
Afu1g12180	65.7593	50.3862	72.215	62.5365	4.1371e-19	1.54892	171.358	No	No	No
Afu1g12190	13.7132	8.21618	21.5379	12.7005	0.00479837	0.000239069	3096.26	No	No	No
Afu1g12200	54.4845	52.2367	64.7257	50.1311	3345.48	0.436852	236.559	No	No	No
Afu1g12210	3.54301	1.90658	5.09734	9.06813	5.24589	95.2785	2.63683e-15	No	No	No
Afu1g12220	27.5116	11.3511	33.7512	23.9417	6.90095e-17	49.6693	314.558	No	No	No
Afu1g12230	28.2583	11.0812	33.6914	22.2859	1.21571e-44	3.47713	0.000879943	No	No	No
Afu1g12240	10.882	5.09848	10.4523	35.7144	2.1055e-13	5858.14	1.70562e-129	No	No	No
Afu1g12250	99.6388	80.6025	353.866	73.7432	0.000436284	0	1.43882e-16	No	No	No
Afu1g12260	56.0938	97.218	54.3102	72.2337	5.75207e-58	3925.21	2.59447e-13	No	No	No
Afu1g12270	9.98196	13.9441	17.6469	12.7377	997.522	23.5595	1704.94	No	No	No
Afu1g12280	34.9478	59.9243	49.8779	42.5347	5.50048e-34	4.84711e-12	0.0026318	No	No	No
Afu1g12290	99.4357	67.6583	122.834	140.993	1.98401e-09	0.0358672	4.11108e-17	No	No	No
Afu1g12300	16.0445	7.97307	17.4802	19.5354	3.41619e-11	2507.8	11.5609	No	No	No
Afu1g12310	31.1976	13.4544	26.4772	23.364	8.06783e-45	7.57878	2.14639e-08	No	No	No
Afu1g12320	9.60165	5.50351	8.06561	8.5462	9.96016	2460.23	3329.66	No	No	No
Afu1g12332	45.1353	31.5	37.6648	46.7268	2.76662e-40	2.6395e-09	761.244	No	No	No
Afu1g12340	79.226	62.8276	64.8129	107.95	1.1261e-16	4.70399e-12	1.62032e-59	No	No	No
Afu1g12350	22.1343	20.851	42.0525	106.593	4155.75	1.45739e-21	8.13683e-293	No	No	Up
Afu1g12360	1.76516	0.812671	0.820467	1.95214	2993.85	3017.26	9784	No	No	No
Afu1g12370	69.8098	74.6552	74.0645	93.507	78.0638	197.002	8.29385e-44	No	No	No
Afu1g12380	69.3028	177.037	89.9568	110.654	1.366e-214	1.06583e-09	7.04244e-58	No	No	No
Afu1g12390	51.7833	124.009	62.2228	70.4419	2.94704e-203	0.000463413	3.31139e-25	No	No	No
Afu1g12400	14.5544	5.69016	15.2622	9.18036	7.10522e-16	5583.69	5.96466e-06	No	No	No
Afu1g12410	2.96878	4.38854	4.5321	1.03326	96.4762	43.5107	1.62831e-06	No	No	No
Afu1g12420	1.84943	1.72321	1.33039	0.905795	8394.56	4305.87	311.184	No	No	No
Afu1g12440	25.8746	8.58836	24.8391	24.6836	1.43329e-32	5512.89	3855.84	No	No	No
Afu1g12450	24.9637	18.9759	25.8578	38.1551	0.079854	5371.77	5.62023e-18	No	No	No
Afu1g12460	39.0342	24.2769	26.3135	24.4928	2.84454e-10	1.40453e-06	3.36721e-16	No	No	No
Afu1g12475	1.5427	8.39389	2.17293	3.53632	4.73119e-06	4593.06	49.4473	Up	No	No
Afu1g12480	56.1178	10.8413	58.9106	21.9632	3.42405e-277	1121.22	1.2582e-198	Down	No	No
Afu1g12490	104.925	6.46626	159.707	812.273	0	2.47322e-75	0	Down	No	Up
Afu1g12500	3.01115	1.84843	6.68707	0.222009	2394.27	73.9545	0.000443779	No	No	Down
Afu1g12510	32.6963	9.22747	36.8611	6.82941	5.43692e-52	380.317	1.8579e-118	No	No	Down
Afu1g12520	20.5074	16.5845	19.4852	20.1847	1.18422	3323.83	6952.15	No	No	No
Afu1g12530	67.7445	62.3117	72.3931	124.055	153.647	456.949	3.67275e-127	No	No	No
Afu1g12540	19.8235	18.41	18.9272	25.3516	411.674	1957.85	2.52371e-14	No	No	No
Afu1g12550	62.1546	75.0209	62.2102	74.3646	3.73989e-18	9465.99	4.57405e-24	No	No	No
Afu1g12560	17.9574	11.6367	33.0819	49.2738	0.0010724	7.4778e-18	1.09643e-87	No	No	No
Afu1g12570	49.8882	59.4059	54.0972	52.5028	0.000493769	134.435	636.399	No	No	No
Afu1g12580	121.066	62.0839	133.983	108.432	5.4273e-22	544.638	155.202	No	No	No
Afu1g12590	101.455	326.086	96.2475	69.7508	0	812.793	1.21867e-40	No	No	No
Afu1g12600	8.16441	6.98074	7.83078	6.2775	451.389	5822.31	0.579113	No	No	No
Afu1g12610	124.401	412.854	156.915	312.094	0	6.40716e-30	0	No	No	No
Afu1g12620	50.596	182.42	108.853	55.9722	0	1.25856e-139	5.90253	No	No	No
Afu1g12630	61.2234	14.3023	86.1626	61.585	8.02773e-115	7.97441e-13	8640.76	Down	No	No
Afu1g12640	51.6086	40.152	58.9968	32.4709	0.0018293	23.5913	2.0297e-25	No	No	No
Afu1g12650	87.0344	32.5107	110.507	64.9838	1.00891e-130	1.27175e-11	5.86571e-22	No	No	No
Afu1g12660	506.43	297.235	561.9	252.656	3.0677e-186	2.61195e-07	0	No	No	No
Afu1g12670	48.9118	23.0339	47.327	51.3673	1.65691e-47	4267.03	1558.59	No	No	No
Afu1g12680	48.5847	28.319	38.9241	34.649	1.87053e-68	1.79997e-11	2.23393e-43	No	No	No
Afu1g12690	4.29208	2.92749	4.68363	5.66547	0.125718	2702.53	0.10941	No	No	No
Afu1g12700	19.2397	16.3031	15.3216	19.573	0.13784	3.92195e-05	5744.01	No	No	No
Afu1g12710	5.47944	10.622	4.46827	5.16686	131.335	5123.39	7782.38	No	No	No
Afu1g12720	37.8512	23.1462	31.3744	32.5172	2.04312e-11	11.5274	12.1441	No	No	No
Afu1g12730	29.3637	69.6233	41.2247	50.0427	2.77642e-70	2.885e-06	1.83476e-30	No	No	No
Afu1g12740	201.197	158.027	347.363	291.364	0.0862174	5.19069e-30	7.29952e-17	No	No	No
Afu1g12750	32.1098	25.5513	45.384	43.2311	0.541714	2.16415e-08	1.27352e-08	No	No	No
Afu1g12760	47.1682	47.9995	47.256	58.8423	6347.15	9485.77	3.64254e-09	No	No	No
Afu1g12770	46.5645	48.0974	43.5304	64.9384	3397.45	537.266	3.4871e-31	No	No	No
Afu1g12780	39.9672	99.784	45.4518	56.634	1.1492e-62	472.119	1.14493e-07	No	No	No
Afu1g12790	44.529	45.8307	42.3813	41.7662	2974.47	807.969	63.0181	No	No	No
Afu1g12800	102.273	170.956	125.009	190.956	4.98293e-78	4.19333e-08	5.90782e-170	No	No	No
Afu1g12810	40.9516	31.6407	45.8856	50.6023	0.112135	356.934	0.0171741	No	No	No
Afu1g12820	8.70859	18.4824	12.8182	14.5782	1.03321e-38	1.32298e-06	1.5332e-21	No	No	No
Afu1g12830	22.0527	410.146	61.6444	262.936	0	7.03206e-197	0	Up	No	Up
Afu1g12840	13.6815	185.947	58.6461	388.97	0	0	0	Up	Up	Up
Afu1g12850	12.5108	148.196	36.8356	352.771	0	1.30156e-72	0	Up	No	Up
Afu1g12860	18.3757	8.19154	22.6411	9.01924	0.00377365	967.099	0.000103138	No	No	No
Afu1g12870	31.7627	22.1186	29.1568	43.0624	6.45461e-08	852.613	9.18758e-12	No	No	No
Afu1g12875	65.8689	32.232	59.3672	34.5168	7.05298e-37	240.6	1.32076e-48	No	No	No
Afu1g12880	35.8132	18.3402	47.4664	28.6376	3.86963e-16	0.013236	0.330328	No	No	No
Afu1g12890	397.612	1088.23	400.669	605.965	0	6494.05	1.29444e-216	No	No	No
Afu1g12900	53.7512	47.7266	41.9855	31.4413	0.0116028	1.33239e-18	1.71339e-128	No	No	No
Afu1g12910	48.6734	33.2652	59.1702	41.3429	9.01924e-23	3.08814e-06	4.20767e-05	No	No	No
Afu1g12920	319.888	37.8329	383.923	211.663	0	3.16881e-59	0	Down	No	No
Afu1g12930	59.8215	59.4578	59.0062	55.9969	8661.36	7244.84	542.058	No	No	No
Afu1g12940	199.012	123.724	193.244	170.633	5.2663e-77	1879	7.05986e-12	No	No	No
Afu1g12950	23.906	26.9082	26.7984	48.809	61.5829	82.5067	1.51647e-107	No	No	No
Afu1g12960	97.1062	110.639	108.818	175.973	1.10016e-05	0.00120987	6.72959e-288	No	No	No
Afu1g12970	66.5771	27.4719	40.5582	30.0757	3.70809e-32	1.57876e-10	7.07747e-43	No	No	No
Afu1g12980	24.9397	10.9088	27.5148	24.802	6.43545e-27	899.444	8833	No	No	No
Afu1g12990	48.759	23.2284	67.6718	37.4211	3.75769e-29	7.86379e-08	4.64929e-05	No	No	No
Afu1g13000	13.1682	23.6507	10.5936	3.96885	1.07202e-07	355.924	4.15962e-27	No	No	No
Afu1g13010	24.5096	80.3321	19.6452	17.5159	7.12039108483554e-317	0.00389486	4.0211e-16	No	No	No
Afu1g13020	52.6304	41.1606	75.121	92.5029	0.000189612	7.48118e-17	8.85007e-72	No	No	No
Afu1g13030	5.14177	10.6456	5.13818	12.0189	3.28886e-13	9784	2.96091e-28	No	No	No
Afu1g13040	50.6901	77.1691	42.8477	55.4247	2.41389e-19	5.46473	200.174	No	No	No
Afu1g13050	84.0586	403.6	96.9035	124.921	0	2.69366	1.59179e-33	Up	No	No
Afu1g13060	45.8052	77.0307	38.1578	54.3393	5.62865e-101	1.16727e-06	4.164e-11	No	No	No
Afu1g13070	32.9661	119.356	29.6097	36.3526	9.56631e-181	841.32	493.63	No	No	No
Afu1g13080	0.66588	2.68248	0.773774	1.32555	0.00537753	7018.51	173.392	Up	No	No
Afu1g13090	263.643	374.327	205.63	173.492	3.01848e-174	3.69598e-64	4.4273e-259	No	No	No
Afu1g13100	23.2044	28.0491	16.8319	26.8072	1.28765e-07	4.61631e-20	1.15507e-05	No	No	No
Afu1g13110	13.0929	2.20465	24.7656	4.65769	6.71637e-58	4.41098e-22	6.20174e-44	Down	No	No
Afu1g13120	32.7044	15.9299	28.5302	17.7699	5.61796e-08	1298.13	1.04076e-09	No	No	No
Afu1g13130	33.1626	43.7843	45.8957	50.5105	0.00132947	4.59757e-06	1.1461e-18	No	No	No
Afu1g13140	301.7	164.173	367.075	249.337	1.11758e-175	8.05349e-25	3.32054e-29	No	No	No
Afu1g13150	42.3167	45.7383	67.1507	90.1266	2603.15	8.90613e-10	3.46604e-49	No	No	No
Afu1g13160	134.518	159.182	173.546	145.721	2.94547e-07	1.13902e-20	2.14052	No	No	No
Afu1g13170	14.8035	7.16578	24.2223	29.2853	1.958e-07	1.47612e-05	4.82334e-21	No	No	No
Afu1g13180	11.858	9.99832	11.6965	13.7089	1087.68	8989.56	859.83	No	No	No
Afu1g13190	34.8284	39.5335	32.5707	46.2128	34.6206	1369.31	6.68333e-12	No	No	No
Afu1g13195	188.288	108.103	279.66	234.768	2.53293e-22	2.36714e-17	1.40583e-05	No	No	No
Afu1g13200	10.0528	24.6356	10.1145	13.3139	2.26948e-109	9018.34	3.65886e-09	No	No	No
Afu1g13210	41.0984	67.8867	33.2882	92.6898	6.01237e-42	0.0051197	2.65021e-181	No	No	No
Afu1g13220	21.7981	129.352	34.8289	38.4121	0	5.42103e-16	8.81891e-37	Up	No	No
Afu1g13230	6.17017	2526.8	11.6666	53.0082	0	6.6557e-16	0	Up	No	Up
Afu1g13240	18.0396	25.2365	20.5357	10.0972	0.0148221	790.124	1.12077e-12	No	No	No
Afu1g13250	14.258	21.8948	14.1599	27.7706	5.76732e-20	8681.28	1.74633e-80	No	No	No
Afu1g13260	162.29	175.505	222.484	192.515	55.1802	3.41577e-28	1.54157e-09	No	No	No
Afu1g13270	45.0049	9.81307	42.7688	14.7308	1.28029e-86	3306.64	5.98217e-91	Down	No	No
Afu1g13280	101.217	100.342	96.421	104.987	7416.4	866.7	1145.05	No	No	No
Afu1g13290	41.9972	35.2008	34.0534	49.2887	0.819749	0.0350496	0.0356403	No	No	No
Afu1g13300	48.8346	101.726	69.8635	78.6156	9.61216e-91	4.19545e-16	6.00842e-46	No	No	No
Afu1g13310	23.6316	70.0266	23.9357	22.9371	1.50924e-155	7963.8	4837.65	No	No	No
Afu1g13320	19.8188	18.9044	16.5834	14.2287	4906.32	149.478	0.000888412	No	No	No
Afu1g13330	135.698	102.55	155.158	167.549	1.47463e-19	0.00137701	6.32259e-20	No	No	No
Afu1g13340	90.0565	41.6252	97.2198	47.9129	1.58844e-96	98.937	5.96392e-106	No	No	No
Afu1g13350	30.661	2.47937	77.4888	6.50992	3.38657e-205	1.97953e-141	5.85782e-204	Down	No	Down
Afu1g13360	10.5927	3.85013	15.509	21.423	6.46468e-14	0.0601196	3.39078e-22	No	No	No
Afu1g13370	49.4103	24.6641	38.7295	42.0769	7.00675e-34	0.00526355	0.414772	No	No	No
Afu1g13380	54.1542	19.8367	71.6562	59.6461	1.82629e-50	4.50407e-05	202.842	No	No	No
Afu1g13390	49.9772	26.7374	50.4395	70.2289	1.46882e-37	8087.63	5.19693e-24	No	No	No
Afu1g13400	24.4027	111.919	58.0171	148.65	1.7811e-49	1.0341e-09	1.42424e-106	Up	No	Up
Afu1g13410	21.8759	20.1431	25.6238	27.5416	3366.62	523.267	6.60543	No	No	No
Afu1g13420	105.768	92.9327	92.9242	124.756	0.102412	0.105368	5.88895e-09	No	No	No
Afu1g13430	87.9349	43.4811	120.32	98.6018	3.27727e-46	3.39248e-13	4.29824	No	No	No
Afu1g13440	15.5834	6.74349	16.845	8.55028	1.15132e-27	1740.25	3.97586e-24	No	No	No
Afu1g13450	22.7757	44.1023	27.1061	43.976	3.59067e-73	0.137502	2.18868e-100	No	No	No
Afu1g13460	29.1018	30.7881	25.8523	22.1534	2705.35	265.026	1.31509e-05	No	No	No
Afu1g13470	140.416	177.804	203.84	190.233	1.69703e-12	4.39754e-37	1.71255e-33	No	No	No
Afu1g13480	304.815	320.388	486.827	414.004	1490.39	1.84379e-46	5.0874e-25	No	No	No
Afu1g13490	333.045	510.628	379.564	663.51	6.60037e-130	2.57338e-08	0	No	No	No
Afu1g13500	355.263	351.299	328.872	783.923	3509.76	5.4858e-06	0	No	No	No
Afu1g13510	40.3585	57.1481	38.7277	48.4962	1.03601e-27	2038.84	1.29847e-08	No	No	No
Afu1g13520	68.4881	30.276	58.6232	60.4843	1.81546e-89	0.0514494	0.0781769	No	No	No
Afu1g13530	56.5248	22.9036	39.7676	27.142	2.8756e-23	0.015404	3.44196e-26	No	No	No
Afu1g13540	61.6067	76.8392	68.2741	57.1919	8.56113e-07	35.0216	136.805	No	No	No
Afu1g13550	71.6654	72.339	44.2824	35.0052	8635.9	5.80104e-09	7.31278e-33	No	No	No
Afu1g13560	19.7175	5.70274	11.6911	19.2901	6.29756e-25	0.000237226	7393.19	No	No	No
Afu1g13570	77.8366	211.751	82.1858	76.8821	2.78264e-215	1731.15	6960.93	No	No	No
Afu1g13580	27.9165	23.2884	33.5667	35.477	0.380786	0.0506749	7.93541e-09	No	No	No
Afu1g13590	42.4447	23.1674	50.4695	57.063	2.02018e-58	0.000104628	3.10285e-29	No	No	No
Afu1g13600	25.4397	32.8119	38.8948	40.4062	0.0652319	5.93804e-11	2.87975e-20	No	No	No
Afu1g13610	23.8641	12.5738	31.77	56.5444	3.30035e-28	5.38761e-07	1.72688e-151	No	No	No
Afu1g13620	26.4681	36.5054	25.0528	28.2846	6.68114e-14	1792.11	460.104	No	No	No
Afu1g13630	39.24	50.2967	38.4527	40.3401	0.00855492	6910.41	5412.97	No	No	No
Afu1g13640	3.26163	3.19795	4.21125	1.88373	9784	4572.98	514.813	No	No	No
Afu1g13650	5.31584	5.58972	4.27064	3.61447	8805.8	4094.62	815.507	No	No	No
Afu1g13660	921.283	94.0969	411.523	11.18	0	0	0	Down	No	Down
Afu1g13670	192.872	63.9118	92.8889	41.4133	7.33065e-195	1.94452e-100	0	No	No	Down
Afu1g13680	42.9187	7.95874	30.1316	13.8836	5.47886e-73	0.000890481	1.62277e-68	Down	No	No
Afu1g13690	30.1142	15.3342	29.6288	24.5524	2.0959e-77	5838.12	3.59377e-11	No	No	No
Afu1g13700	21.4347	20.6747	18.9795	16.494	3628.03	28.3057	2.77625e-10	No	No	No
Afu1g13710	84.4603	449.191	89.9463	253.823	0	14.9586	0	Up	No	No
Afu1g13720	42.5416	45.6024	55.9539	57.144	129.83	8.79143e-21	4.12694e-36	No	No	No
Afu1g13730	36.6399	51.6155	38.7946	32.5026	4.60575e-30	585.565	0.039108	No	No	No
Afu1g13740	66.3422	143.892	56.0557	53.1602	0	3.80114e-14	6.23693e-39	No	No	No
Afu1g13750	11.3318	148.959	21.5337	10.6772	0	1.49646e-25	2783.26	Up	No	No
Afu1g13760	70.791	45.793	66.2155	104.634	9.90052e-35	293.021	1.21151e-59	No	No	No
Afu1g13770	22.2362	22.43	22.9322	29.756	8841.37	6160.76	1.03614e-05	No	No	No
Afu1g13780	987.564	605.805	1656.7	1304.65	1.10995e-114	7.22867e-209	2.65762e-75	No	No	No
Afu1g13790	1628.8	1672.89	1722.63	2441.55	345.294	0.0849635	0	No	No	No
Afu1g13800	7.51005	23.4899	8.58341	7.6352	1.59107e-59	1301.84	8357.66	No	No	No
Afu1g13810	1.34268	0.257568	0.780116	0.66821	1702.02	6912.48	2655.93	No	No	No
Afu1g13820	1.20446	0.528122	0.93308	0.856319	811.266	5568.22	3016.47	No	No	No
Afu1g13830	7.94785	0.826929	21.9151	100.68	3.26127e-10	1.03772e-09	3.47227e-205	Down	No	Up
Afu1g13840	23.152	82.6175	28.2533	31.9093	1.52889e-134	26.5384	2.76015e-05	No	No	No
Afu1g13850	17.4802	28.5689	18.6676	25.4846	1.05814e-17	2509.69	3.0117e-13	No	No	No
Afu1g13860	29.1805	10.5124	25.7859	17.7987	2.92243e-44	283.031	5.49241e-19	No	No	No
Afu1g13870	25.8778	18.2682	27.2893	24.8986	9.45911e-08	2502.64	3141.87	No	No	No
Afu1g13880	20.1711	67.172	25.7527	17.3072	2.95241e-208	0.00591874	5.03131	No	No	No
Afu1g13890	41.1027	70.2096	45.597	42.4821	2.00984e-47	84.3912	3224.24	No	No	No
Afu1g13900	14.8849	47.2658	15.9945	14.8748	0	556.604	9537.21	No	No	No
Afu1g13910	38.9942	137.294	35.7152	43.2161	0	118.664	2.32227	No	No	No
Afu1g13920	30.2404	55.8509	27.4407	43.8848	7.89545e-149	4.55445	1.9039e-67	No	No	No
Afu1g13930	71.0752	45.4023	73.2292	72.1571	2.00139e-25	3955.14	6127.61	No	No	No
Afu1g13940	2.86922	7.73907	11.0801	30.6932	1.82858e-10	5.27848e-26	1.14186e-183	No	No	Up
Afu1g13950	38.6054	4.03702	29.1911	7.94143	1.034e-114	0.0496617	8.21273e-130	Down	No	Down
Afu1g13960	60.4359	81.4495	68.7497	65.1822	4.25005e-13	5.00605	156.657	No	No	No
Afu1g13970	42.3167	20.4707	45.8859	47.8627	2.94172e-63	195.38	0.168775	No	No	No
Afu1g13980	32.4378	5.40893	49.9511	15.686	8.64744e-177	1.16023e-27	2.04553e-73	Down	No	No
Afu1g13990	78.1804	5.87813	150.526	33.8565	1.43233e-263	1.36812e-76	1.50776e-96	Down	No	No
Afu1g14000	6.36142	3.35588	7.85418	5.67221	194.673	3690.99	5283.5	No	No	No
Afu1g14010	145.434	88.9968	219.791	194.529	4.12254e-22	3.41785e-24	3.24457e-15	No	No	No
Afu1g14020	116.268	241.388	151.524	178.53	2.7232e-149	1.55347e-13	5.33406e-61	No	No	No
Afu1g14030	84.8463	73.5132	118.216	111.784	1.2399	3.67425e-19	3.56563e-18	No	No	No
Afu1g14040	27.4989	8.50099	10.8048	18.6191	1.50371e-24	1.0965e-16	0.000454183	No	No	No
Afu1g14050	42.1106	78.163	47.5871	23.4709	2.33493e-18	925.94	1.49158e-13	No	No	No
Afu1g14060	47.8704	55.0984	57.5825	53.7066	138.303	10.7356	171.397	No	No	No
Afu1g14070	20.1937	13.2404	19.6868	23.638	4.47859e-13	5702.19	0.172584	No	No	No
Afu1g14080	14.1344	2.37433	19.6208	14.9051	1.33265e-59	0.00346793	3604.85	Down	No	No
Afu1g14090	185.504	491.748	176.53	157.725	0	234.032	1.81542e-14	No	No	No
Afu1g14100	44.2914	47.562	60.9546	48.5876	680.944	6.12826e-14	44.6292	No	No	No
Afu1g14110	77.3725	174.7	100.372	95.8408	5.79848e-105	6.55306e-06	1.84272e-05	No	No	No
Afu1g14120	84.628	141.528	74.9039	101.915	7.80983e-86	0.444538	1.15548e-11	No	No	No
Afu1g14130	2.67323	3.88427	3.65715	9.30956	371.802	908.838	2.16766e-19	No	No	No
Afu1g14140	12.7334	2.06215	7.33634	3.38258	8.10767e-32	0.00311215	2.28222e-35	Down	No	No
Afu1g14150	99.7762	128.756	126.764	114.069	0.0114021	0.0505756	29.5921	No	No	No
Afu1g14160	11.4807	4.72257	18.5214	24.8177	0.00123351	0.862306	1.52745e-11	No	No	No
Afu1g14170	6.03288	2.29926	5.52474	4.28596	1.43959e-19	2656.34	0.00466447	No	No	No
Afu1g14180	30.4471	57.9712	28.8505	35.9343	4.10008e-89	1474.93	0.000213487	No	No	No
Afu1g14190	4.97676	11.8928	9.3632	8.80634	0.027787	12.0538	9.22104	No	No	No
Afu1g14200	129.808	188.965	195.206	218.702	3.71273e-61	1.92246e-73	1.16398e-179	No	No	No
Afu1g14210	19.0768	8.39255	24.3847	21.6463	1.95786e-14	7.51482	446.761	No	No	No
Afu1g14220	99.239	343.196	114.28	123.802	0	0.206082	4.18415e-12	No	No	No
Afu1g14230	15.2448	0.917468	11.6941	7.00834	1.52539e-50	77.8495	6.07324e-14	Down	No	No
Afu1g14240	29.8001	26.6809	39.9681	40.6062	68.6371	3.95105e-11	4.35103e-19	No	No	No
Afu1g14250	19.7445	16.1157	25.3345	21.5967	1.66228	0.00257009	323.402	No	No	No
Afu1g14260	24.1698	16.3914	23.0749	25.7948	4.38127e-20	1909.59	239.501	No	No	No
Afu1g14270	70.3003	30.9948	63.9301	52.44	3.55997e-61	190.458	3.48509e-13	No	No	No
Afu1g14280	33.4566	59.249	36.518	67.9205	2.51093e-53	296.527	1.86046e-122	No	No	No
Afu1g14290	75.1271	73.9238	87.7565	88.592	7731.3	66.3525	5.45242	No	No	No
Afu1g14300	226.34	75.1017	182.068	204.039	0	9.65884e-27	7.78753e-08	No	No	No
Afu1g14310	96.7669	47.6059	82.3008	77.2544	2.31724e-95	0.000404067	4.99147e-16	No	No	No
Afu1g14320	34.4709	36.091	40.8109	51.9029	2989.14	1.032	3.10815e-28	No	No	No
Afu1g14330	94.1642	14.1698	102.692	27.8299	0	0.000345563	0	Down	No	No
Afu1g14340	37.5885	15.5345	36.5268	19.1296	9.76351e-70	4638.23	2.92071e-69	No	No	No
Afu1g14350	95.1433	84.7011	93.4448	51.6065	27.5171	6336.67	6.10014e-63	No	No	No
Afu1g14360	15.821	11.0768	15.3472	12.0425	4.12415e-05	5804.87	0.000206808	No	No	No
Afu1g14380	25.8725	12.9712	34.7373	22.4693	1.99205e-11	0.198185	247.782	No	No	No
Afu1g14390	8.47627	12.9298	12.4209	22.4529	0.0671854	0.585286	2.31983e-39	No	No	No
Afu1g14400	29.6777	19.5928	34.4157	39.305	4.80438e-06	116.075	3.4467e-05	No	No	No
Afu1g14410	352.498	1635.29	350.338	576.697	0	7724.19	5.23254e-187	Up	No	No
Afu1g14420	78.9698	171.342	73.8577	100.144	4.71394e-142	683.842	1.61344e-12	No	No	No
Afu1g14430	8.30291	13.174	8.23098	67.5144	0.323211	9305.05	2.96145e-225	No	No	Up
Afu1g14440	18.6575	18.1685	17.7916	17.3115	6518.07	4460.57	1459.97	No	No	No
Afu1g14450	24.4258	43.6617	24.9431	20.4394	1.20219e-60	5842.44	0.00134447	No	No	No
Afu1g14460	17.7396	11.8191	15.648	28.9827	2.73854e-07	285.091	7.4474e-28	No	No	No
Afu1g14480	2.12831	13.1775	3.69553	9.02549	2.35407e-26	121.851	4.52325e-17	Up	No	Up
Afu1g14490	32.7063	33.1104	29.6665	17.66	8056.72	568.095	7.1232e-36	No	No	No
Afu1g14500	23.4224	26.5382	31.3582	27.25	14.0964	9.44075e-11	0.0339957	No	No	No
Afu1g14510	8.39358	10.123	8.4852	12.2049	18.9925	8562.04	1.5752e-10	No	No	No
Afu1g14520	2.36259	1.58267	2.70183	2.11518	317.444	4117.85	4143.29	No	No	No
Afu1g14530	15.7288	11.8245	20.3905	15.2481	0.234878	0.141739	5469.47	No	No	No
Afu1g14540	1306.91	740.024	1260.81	1779.18	0	2.79136	0	No	No	No
Afu1g14550	14780.7	9483.06	17002.9	12784.2	0	0	0	No	No	No
Afu1g14560	198.541	107.978	267.188	315.461	1.92261e-161	1.36461e-57	5.16741e-218	No	No	No
Afu1g14570	282.979	188.504	240.461	199.472	7.08047e-200	3.56827e-34	1.96852e-227	No	No	No
Afu1g14580	20.4758	62.1009	29.4126	17.7167	4.81372e-74	0.00364189	283.473	No	No	No
Afu1g14590	28.5837	35.3248	56.1038	29.1496	168.253	1.20903e-13	8019.95	No	No	No
Afu1g14600	21.0094	28.2503	22.0626	17.6291	0.238627	5178.47	60.0668	No	No	No
Afu1g14610	50.0134	44.1403	61.8549	92.6784	0.779657	3.97995e-09	2.14543e-160	No	No	No
Afu1g14620	33.041	48.8839	33.3421	48.1664	4.15185e-37	7686.95	1.38168e-48	No	No	No
Afu1g14630	22.1227	55.3067	22.539	15.1897	1.65116e-62	7746.93	2.24403e-06	No	No	No
Afu1g14640	25.7553	62.7918	40.4573	35.9478	6.19702e-52	7.77839e-09	1.03385e-05	No	No	No
Afu1g14650	38.4341	20.1762	29.471	16.5815	1.30538e-23	0.00998181	1.96612e-60	No	No	No
Afu1g14660	41.6634	20.4587	38.8076	35.9533	1.59586e-31	1498.68	3.45322	No	No	No
Afu1g14670	36.7712	55.0562	36.3512	39.5247	9.94469e-19	7850.08	538.724	No	No	No
Afu1g14680	42.5447	85.5601	41.4436	50.5546	7.89966e-303	2327.57	2.28015e-18	No	No	No
Afu1g14690	46.6839	115.778	42.6195	62.4386	1.68021e-299	33.2095	2.67624e-30	No	No	No
Afu1g14695	60.7854	22.0072	57.8119	35.2376	1.73319e-64	2708.79	1.90243e-34	No	No	No
Afu1g14700	63.5786	99.2829	45.828	213.963	3.9764e-46	1.21244e-15	0	No	No	No
Afu1g14710	56.7316	68.1704	55.6166	115.152	0.00124633	5829.34	4.50365e-157	No	No	No
Afu1g14720	20.803	76.4661	23.1071	19.8587	9.58437e-296	256.695	2399.78	No	No	No
Afu1g14730	39.3994	24.5558	57.2324	56.4004	5.58813e-24	3.59177e-22	2.45633e-29	No	No	No
Afu1g14740	52.0492	74.5603	59.5747	77.2576	1.40313e-16	9.33095	2.91142e-30	No	No	No
Afu1g14750	65.2001	150.346	69.8132	94.5701	9.58949e-273	160.814	4.13867e-59	No	No	No
Afu1g14760	5.88891	1.99966	7.83941	2.88956	1.35913e-12	25.1053	1.43998e-09	No	No	No
Afu1g14770	21.8841	65.1158	26.75	26.4824	7.20146e-190	0.108024	0.00613666	No	No	No
Afu1g14780	433.837	268.794	435.135	417.814	3.09268e-99	8628.09	225.786	No	No	No
Afu1g14790	33.599	34.4585	39.6559	134.912	6098.22	5.03645	0	No	No	Up
Afu1g14800	3745.53	280.873	3093.27	2990.52	0	1.669e-107	4.51929e-219	Down	No	No
Afu1g14810	46.395	19.1693	43.8309	55.9624	3.2963e-160	321.105	4.5223e-15	No	No	No
Afu1g14820	27.9435	8.13309	30.605	29.5715	1.39186e-09	4599.31	6029.43	No	No	No
Afu1g14830	118.032	97.5941	127.849	150.984	2.11959e-09	10.4678	3.26428e-32	No	No	No
Afu1g14840	27.4511	21.2366	28.7614	15.4284	5.20775	5028.44	3.97035e-15	No	No	No
Afu1g14850	139.123	66.075	160.978	65.515	3.17526e-140	6.18421e-06	1.33447e-222	No	No	No
Afu1g14860	2.46532	4.83435	6.47227	9.70928	4.53278	0.000508627	1.00605e-18	No	No	No
Afu1g14870	16.193	23.8804	11.9126	11.4758	2.01507e-06	0.211608	6.53967e-05	No	No	No
Afu1g14880	23.9604	10.8988	18.6903	11.7078	1.29309e-35	0.0231847	6.4611e-48	No	No	No
Afu1g14890	28.5645	18.1703	23.8238	24.2179	1.49286e-12	4.20814	0.895795	No	No	No
Afu1g14910	61.3468	75.5272	60.2645	62.8707	1.53293e-06	5936.16	3838.97	No	No	No
Afu1g14920	96.5645	82.9243	86.3582	65.197	0.001014	0.822062	9.09061e-53	No	No	No
Afu1g14930	112.044	3182.68	168.141	221.086	0	1.65626e-14	7.72163e-72	Up	No	No
Afu1g14940	73.5721	186.852	63.0631	151.695	0	0.000236859	5.14499125345452e-311	No	No	No
Afu1g14945	26.9163	39.2092	37.0435	472.841	8.25841e-07	0.000600056	0	No	No	Up
Afu1g14950	46.5738	58.0532	48.6087	170.597	1.72477e-06	2307.58	0	No	No	No
Afu1g14960	56.6773	29.3898	38.9393	31.8908	8.66494e-174	2.28831e-63	1.10974e-211	No	No	No
Afu1g14970	35.7764	73.7239	45.844	39.0189	1.11272e-26	4.42185	1653.35	No	No	No
Afu1g14980	9.89392	24.5353	11.8524	8.77534	3.24658e-45	145.002	648.616	No	No	No
Afu1g14990	13.8723	55.1136	18.5538	20.0016	3.03737e-254	0.000294843	3.72467e-13	No	No	No
Afu1g15000	35.8963	306.06	50.0009	47.2659	0	1.51142e-15	1.14307e-14	Up	No	No
Afu1g15010	20.2889	14.2941	19.7811	33.4833	2.31917e-21	4077.38	1.07109e-98	No	No	No
Afu1g15020	1151.48	4511.57	1470.87	1730.09	0	2.23477e-98	0	No	No	No
Afu1g15030	30.208	73.6916	26.0066	24.1626	1.00532e-163	3.21463	1.30267e-06	No	No	No
Afu1g15040	34.4055	16.5293	31.5478	23.6045	9.0384e-19	1739.41	1.51347e-07	No	No	No
Afu1g15050	23.697	182.872	17.3882	20.748	0	2.30166e-09	0.669576	Up	No	No
Afu1g15070	84.5336	49.4948	85.8636	90.1946	5.98021e-55	5884.29	68.6843	No	No	No
Afu1g15080	31.1761	35.0978	34.7181	40.4321	49.7342	107.502	3.14529e-10	No	No	No
Afu1g15090	49.3023	41.0604	47.6647	111.414	0.00414575	3284.98	6.99137e-241	No	No	No
Afu1g15100	11.3062	5.73817	15.4486	16.6784	0.0129811	49.634	0.209047	No	No	No
Afu1g15110	34.429	9.65249	31.5211	21.9394	2.35629300864455e-310	5.06089	1.94089e-85	No	No	No
Afu1g15120	13.0243	10.2531	12.8534	13.9091	0.262193	7911.73	1378.91	No	No	No
Afu1g15130	94.4761	49.9701	116.801	119.07	1.1293e-65	6.74284e-09	6.12021e-17	No	No	No
Afu1g15140	250.766	194.165	253.553	202.728	4.37498e-26	5923.77	2.91216e-27	No	No	No
Afu1g15150	15.3758	10.7836	17.9403	13.8627	0.00814549	160.461	619.486	No	No	No
Afu1g15160	75.8758	50.9438	89.3374	206.49	1.71313e-11	1.99788	1.07796e-227	No	No	No
Afu1g15170	43.8284	33.1979	37.7113	17.8788	0.000493195	25.2602	1.18625e-76	No	No	No
Afu1g15180	103.175	25.2696	197.222	59.9963	1.11799e-223	2.64182e-125	5.68139e-75	Down	No	No
Afu1g15190	2.32958	0.752654	3.79937	0.70511	57.5365	858.346	1.4612	No	No	No
Afu1g15200	99.6396	76.8028	100.841	140.13	8.99528e-24	5864.03	1.22933e-81	No	No	No
Afu1g15210	13.5373	7.26012	13.6446	15.8621	1.72702e-07	9163.7	140.867	No	No	No
Afu1g15220	43.708	14.1002	53.8913	40.7317	2.30142e-28	27.4861	2435.34	No	No	No
Afu1g15230	18.1834	22.7279	22.2598	17.1075	0.0299587	0.279755	1475.63	No	No	No
Afu1g15240	163.955	167.819	215.291	179.945	5524.05	4.03011e-09	45.2998	No	No	No
Afu1g15250	72.7075	47.5113	89.6651	79.4605	2.72356e-19	0.000133059	50.0088	No	No	No
Afu1g15260	401.169	171.257	387.042	987.003	0	192.411	0	No	No	No
Afu1g15270	36.1712	44.8679	132.064	127.333	8.42134e-09	0	0	No	No	No
Afu1g15280	13.6505	17.9945	13.0424	11.7908	0.119507	5051.96	104.347	No	No	No
Afu1g15290	3.13039	3.22896	2.30581	0.510787	8478.02	947.878	1.48935e-15	No	No	Down
Afu1g15300	17.3227	10.4246	16.7369	6.81929	1.01842e-08	5753.12	6.37392e-46	No	No	No
Afu1g15310	28.8231	15.0365	25.8109	20.362	4.15739e-44	49.8151	1.51474e-20	No	No	No
Afu1g15330	8.32627	2.0536	8.359	6.24848	5.77552e-22	9784	5.37475	Down	No	No
Afu1g15340	80.4936	38.4273	96.5392	76.0104	7.95788e-106	1.04154e-07	139.738	No	No	No
Afu1g15350	57.3081	14.1777	64.2942	21.5729	1.48668e-114	63.1732	2.62763e-108	Down	No	No
Afu1g15360	101.512	22.4671	77.0384	21.4499	3.00439e-205	3.9388e-10	0	Down	No	Down
Afu1g15370	26.2303	19.356	27.5263	22.5621	8.77117e-11	1787.42	0.0133123	No	No	No
Afu1g15380	21.205	6.04294	32.8319	27.1029	2.45501e-75	9.35227e-19	3.82807e-06	No	No	No
Afu1g15390	175.468	587.531	192.055	350.6	0	25.183	1.99442e-213	No	No	No
Afu1g15400	41.0663	50.2156	41.6776	43.7801	0.218972	7681.46	1188.27	No	No	No
Afu1g15410	11.4814	11.4498	9.56879	6.28923	9784	312.342	7.48523e-12	No	No	No
Afu1g15420	12.968	13.6691	11.0508	10.945	5884.61	1150.63	384.82	No	No	No
Afu1g15430	47.5707	78.5582	53.8649	12.4923	5.01115e-28	80.565	1.62491e-144	No	No	No
Afu1g15440	18.3035	17.7106	14.9946	18.6414	2483.22	3.5381e-07	4400.69	No	No	No
Afu1g15450	69.8587	313.198	60.3889	109.942	0	0.603955	1.55859e-61	Up	No	No
Afu1g15460	23.3098	32.9274	23.0343	43.3309	7.87095e-15	7652.59	1.68875e-84	No	No	No
Afu1g15470	22.0803	8.16361	21.2633	19.7424	1.9176e-85	3345.94	7.40949	No	No	No
Afu1g15490	38.9822	645.845	44.3252	50.675	0	7.80258	2.7272e-13	Up	No	No
Afu1g15500	26.8127	171.338	28.5182	22.9203	0	2039.61	1.93163	Up	No	No
Afu1g15510	21.4781	33.2636	19.4397	26.5721	4.46486e-15	720.804	0.00958253	No	No	No
Afu1g15520	6.8136	3.38694	7.77513	3.82387	1.7576e-14	463.112	3.29852e-16	No	No	No
Afu1g15530	16.3645	4.57741	23.2939	4.08321	1.27912e-19	0.434951	7.92261e-39	No	No	Down
Afu1g15540	27.1659	15.5561	40.7814	10.2687	1.88413e-09	1.90565e-07	2.00371e-44	No	No	No
Afu1g15550	40.2934	115.952	43.8719	18.3551	0	70.8984	3.44833e-137	No	No	No
Afu1g15560	24.7235	59.3365	27.3373	38.7251	5.16083e-63	989.146	3.73821e-17	No	No	No
Afu1g15570	40.82	47.0339	31.5717	21.8439	59.9421	0.0657511	8.28168e-32	No	No	No
Afu1g15580	83.5533	75.3929	93.1986	71.4351	121.422	49.3423	0.0438909	No	No	No
Afu1g15590	201.645	197.36	238.028	295.867	5033.8	0.00108858	3.13824e-49	No	No	No
Afu1g15610	40.2988	20.038	42.8514	39.2511	5.33386e-27	2230.57	5226.73	No	No	No
Afu1g15620	26.5624	58.3199	26.5259	26.5732	2.52991e-92	9605.72	9784	No	No	No
Afu1g15630	16.2757	16.3159	23.3868	17.3611	9784	222.926	6674.28	No	No	No
Afu1g15640	72.2504	22.6135	86.5632	44.7236	4.59455e-92	0.0862547	1.59611e-31	No	No	No
Afu1g15650	1.83195	0.732136	1.68528	0.700662	0.000594676	5654.86	1.42711e-08	No	No	No
Afu1g15660	1.49631	0.725153	1.46422	0.452898	467.556	9784	1.4612	No	No	No
Afu1g15670	11.4898	9.05328	13.3913	8.69381	19.0253	302.211	0.110456	No	No	No
Afu1g15680	10.9299	2.9136	14.9002	11.3185	5.13556e-33	0.124497	5848.98	No	No	No
Afu1g15690	1.15033	1.72122	1.8714	1.98461	1469.38	723.255	181.61	No	No	No
Afu1g15700	18.7235	4.97992	13.2982	15.6899	5.0876e-64	0.000131214	2.0491	No	No	No
Afu1g15710	38.842	19.1396	34.3204	34.8759	1.05126e-66	3.70461	1.53561	No	No	No
Afu1g15720	57.3698	96.7535	51.8388	107.948	1.49045e-103	2.36446	2.63891e-222	No	No	No
Afu1g15730	736.973	3809.05	885.749	1124.91	0	4.13227e-19	8.84398e-176	Up	No	No
Afu1g15740	14.4743	7.72038	14.814	15.0706	1.84587e-06	7829.64	5669.66	No	No	No
Afu1g15750	21.1638	44.8473	20.7099	36.3405	3.60272e-62	6775.3	1.68892e-39	No	No	No
Afu1g15760	47.3666	68.8279	52.0944	71.6387	6.79459e-24	91.0091	1.84646e-43	No	No	No
Afu1g15770	10.6654	9.59964	13.3523	18.9023	2424.01	64.9401	4.744e-15	No	No	No
Afu1g15780	79.6716	40.0711	84.9306	111.953	1.05967e-57	651.216	1.82019e-31	No	No	No
Afu1g15790	47.1291	54.1652	44.8985	58.5082	51.017	3434.32	0.00117225	No	No	No
Afu1g15800	22.5565	19.0318	24.3614	17.5825	1.48362	681.712	3.30915e-07	No	No	No
Afu1g15810	30.6957	34.6654	57.8822	84.0456	62.0239	1.09338e-54	1.8314e-229	No	No	No
Afu1g15820	72.5816	88.2175	123.35	176.049	5.7148e-07	7.38983e-79	0	No	No	No
Afu1g15830	26.3067	22.2321	26.5423	57.7269	34.8073	8712.47	8.55997e-86	No	No	No
Afu1g15840	15.8984	24.0222	20.295	23.5127	1.6575e-07	1.38682	5.3487e-10	No	No	No
Afu1g15850	26.0072	8.35845	18.5311	30.2325	1.12995e-96	1.77492e-10	0.0447738	No	No	No
Afu1g15860	98.2286	121.155	100.774	99.7293	9.72803e-15	3021.98	4605.34	No	No	No
Afu1g15870	52.9711	78.7405	62.9158	89.2082	4.69119e-50	2.12614e-06	6.98841e-131	No	No	No
Afu1g15880	68.304	108.603	86.587	63.7575	7.74547e-42	6.44877e-08	243.469	No	No	No
Afu1g15890	38.6623	20.6369	37.8243	25.6358	7.33749e-63	4773.41	2.96788e-44	No	No	No
Afu1g15900	28.2907	54.5887	27.9536	59.4899	2.47379e-92	7360.6	5.55539e-170	No	No	No
Afu1g15910	2.97114	18.1563	4.3261	1.03723	2.06052e-78	59.1651	1.61428e-08	Up	No	No
Afu1g15920	45.5377	37.024	56.0937	40.575	0.861824	0.136427	66.8845	No	No	No
Afu1g15930	26.0749	60.9579	30.5303	45.6368	1.88415e-126	1.3468	3.89913e-65	No	No	No
Afu1g15940	138.792	62.9263	81.8079	194.777	2.92683e-209	1.87117e-104	1.05039e-91	No	No	No
Afu1g15950	110.981	68.7534	81.7503	178.043	6.60023e-78	4.14604e-33	4.00912e-169	No	No	No
Afu1g15960	191.071	147.463	204.782	138.407	1.06609e-35	1.39912	1.40462e-82	No	No	No
Afu1g15970	23.3412	5.35937	18.5446	15.5147	2.88892e-49	12.2737	1.44731e-07	Down	No	No
Afu1g15980	0.975039	0.311739	0.818296	0.539164	273.493	6755.52	1028.14	No	No	No
Afu1g15990	0.108338	0.0415652	0.0419639	0.107833	5703.93	5715.83	9784	No	No	No
Afu1g16000	0.0624263	0.0479014	0.0483608	0.0138079	9784	9784	9784	No	No	No
Afu1g16010	0.419096	0.872869	0.371049	0.0662131	1106.2	7843.77	21.0319	No	No	No
Afu1g16020	21.166	38.0728	25.5461	11.738	3.66122e-13	148	2.55153e-11	No	No	No
Afu1g16030	24.6819	22.734	54.82	196.055	1629.9	6.07964e-59	0	No	No	Up
Afu1g16040	0.267908	1.49775	0.0889478	1.5407	0.00369352	1129.03	3.53905e-05	Up	No	Up
Afu1g16050	2.85975	2.83804	2.89481	1.87231	9784	9784	19.3375	No	No	No
Afu1g16060	9.37925	10.3393	10.3873	6.57432	3775.27	3490.21	3.31098	No	No	No
Afu1g16070	4.37955	4.0152	3.86278	4.07608	3393.12	1697.89	3232.35	No	No	No
Afu1g16080	6.56932	7.65943	6.87369	5.84993	3043.56	8044.46	3480.79	No	No	No
Afu1g16090	2.25836	0.808688	3.03251	0.366314	284.933	4226.7	0.0729835	No	No	No
Afu1g16100	0.695002	0.246135	0.372745	0.35475	351.348	1919.59	460.655	No	No	No
Afu1g16110	0.886748	0.432998	0.624502	0.374443	1522.37	4996.65	337.62	No	No	No
Afu1g16115	19.0389	10.4744	19.0627	13.6465	0.000162002	9784	0.367198	No	No	No
Afu1g16120	0.0713443	0.0547444	0.0552695	0.0157804	9784	9784	9784	No	No	No
Afu1g16130	0.0182983	0.0140408	0.0141755	0.00404734	9784	9784	9784	No	No	No
Afu1g16140	0.288392	0.221291	0.223414	0.0637884	9784	9784	9784	No	No	No
Afu1g16150	0.13296	0.102024	0.103002	0.0294089	9784	9784	9784	No	No	No
Afu1g16160	14.4984	5.6601	22.562	17.6096	1.74526e-05	1.02854	550.237	No	No	No
Afu1g16170	10.1498	15.3445	10.0286	9.95483	6.13168e-08	8490.73	7028.66	No	No	No
Afu1g16190	94.8299	147.594	139.477	137.562	1.86311e-52	4.40883e-38	2.6638e-50	No	No	No
Afu1g16200	12.4982	5.84936	13.1843	13.6163	1.28289e-11	4958.38	1888	No	No	No
Afu1g16210	14.5928	25.6194	17.8156	22.6787	3.35391e-17	22.0386	2.04877e-13	No	No	No
Afu1g16220	11.6392	27.3198	14.1565	37.0984	1.04155e-52	19.7297	1.28619e-154	No	No	No
Afu1g16230	26.8384	23.6414	27.6322	23.3016	148.94	5525.74	10.0441	No	No	No
Afu1g16240	31.9304	15.3473	34.3914	21.2402	7.86145e-23	1916.99	2.47625e-11	No	No	No
Afu1g16250	91.7465	5.64693	68.1974	8.97579	0	7.17126e-35	0	Down	No	Down
Afu1g16260	0.731279	1.12226	1.13303	0.59308	7243.28	7241.29	7128.6	No	No	No
Afu1g16270	64.9195	14.4531	45.3327	49.3155	3.47225e-164	4.48371e-14	1.34466e-12	Down	No	No
Afu1g16280	191.558	166.527	239.143	259.278	0.125987	4.78303e-10	9.97643e-32	No	No	No
Afu1g16290	19.5904	44.948	18.649	17.2958	2.10457e-87	3276.5	33.4386	No	No	No
Afu1g16300	43.0541	30.6517	51.2694	36.5149	0.00332434	31.4022	17.0632	No	No	No
Afu1g16310	32.5833	24.3644	41.0582	24.5877	0.0192059	0.184074	0.000152962	No	No	No
Afu1g16320	61.8453	72.4018	80.283	112.078	8.25732	0.000157818	6.12318e-57	No	No	No
Afu1g16330	24.68	99.8257	29.1111	18.4718	0	0.751479	2.22283e-10	Up	No	No
Afu1g16340	92.0677	121.252	82.8165	93.6205	3.49988e-31	0.140874	3905.7	No	No	No
Afu1g16350	112.714	101.014	74.8973	45.8025	62.297	2.15774e-17	4.19878e-117	No	No	No
Afu1g16360	32.2795	35.1201	29.6719	22.0588	4566.39	4697.59	1.9154	No	No	No
Afu1g16375	34.7825	69.5415	40.6914	46.7323	2.34094e-95	0.261523	2.17028e-18	No	No	No
Afu1g16390	3.53168	3.50163	4.33448	4.27444	9784	1403.84	1021.71	No	No	No
Afu1g16400	5.01616	6.75159	4.23633	6.42969	93.8107	1810.73	99.2365	No	No	No
Afu1g16410	4.85303	8.69752	4.68661	6.73465	1.25385e-05	7639.56	1.47855	No	No	No
Afu1g16420	4.76727	5.27719	4.32885	3.1893	4044.81	4476.05	2.0686	No	No	No
Afu1g16430	1.26568	36.8835	1.41628	1.02648	0	6173.52	2055.47	Up	No	No
Afu1g16440	9.88284	574.043	9.39822	9.34592	0	4950.06	3459.13	Up	No	No
Afu1g16450	55.6758	134.873	50.4387	13.4852	2.31621e-33	2654.83	3.06965e-48	No	No	Down
Afu1g16460	80.9297	71.6181	84.0559	62.3081	0.0591596	1428.25	3.20403e-26	No	No	No
Afu1g16470	12.6034	21.7959	13.1649	13.2228	8.51341e-30	3916.26	2601.6	No	No	No
Afu1g16480	35.5209	32.7506	38.4873	57.0259	763.929	675.596	2.22954e-40	No	No	No
Afu1g16490	40.2343	14.7609	34.5032	34.3135	4.00405e-45	59.8558	5.18954	No	No	No
Afu1g16500	89.9352	32.1177	95.3056	71.8381	9.51603e-125	797.847	8.56838e-11	No	No	No
Afu1g16510	94.323	68.1267	92.3787	81.8185	3.50558e-10	5903.56	0.271502	No	No	No
Afu1g16523	1057.12	3581.08	1002.2	1573.63	0	58.8544	2.85486e-158	No	No	No
Afu1g16540	29.8606	29.6885	30.4359	41.6194	8999.58	6920.15	2.26934e-13	No	No	No
Afu1g16550	17.1658	52.3032	19.3509	17.4349	2.51166e-114	501.377	7777.03	No	No	No
Afu1g16553	34.0635	40.8358	43.055	28.5513	70.3907	4.4953	32.4608	No	No	No
Afu1g16556	2.88973	51.8864	2.94221	2.83061	1.30532e-149	9784	9049.36	Up	No	No
Afu1g16560	3.84546	156.887	3.7528	7.15799	0	8597.97	0.00032205	Up	No	No
Afu1g16564	59.9649	1097.67	63.5524	61.9352	0	3471.59	5428.33	Up	No	No
Afu1g16570	47.1675	95.1116	53.5355	49.4952	1.97661e-63	67.5954	2224.51	No	No	No
Afu1g16580	15.5133	3.3112	9.143	4.48602	6.69244e-99	6.84329e-17	2.29396e-120	Down	No	No
Afu1g16590	698.189	41.0326	539.71	39.952	0	8.7211e-108	0	Down	No	Down
Afu1g16600	52.2406	39.07	42.0986	52.4707	0.00130732	0.671219	9119.99	No	No	No
Afu1g16610	60.4605	83.8391	57.5011	56.889	4.5995e-14	2245.4	747.098	No	No	No
Afu1g16620	29.7577	20.0864	29.7318	22.8679	3.45803e-11	9784	3.56588e-07	No	No	No
Afu1g16630	26.5403	32.5741	32.2804	11.3513	10.994	19.7297	1.33009e-35	No	No	No
Afu1g16635	44.2424	28.4774	52.6857	54.9543	5.58594e-07	27.0128	0.0739027	No	No	No
Afu1g16640	23.4362	12.9353	24.7172	27.1557	6.97172e-07	4979.65	221.634	No	No	No
Afu1g16650	100.88	37.1039	112.125	104.073	2.68065e-162	1.6579	1877.25	No	No	No
Afu1g16660	35.9984	121.437	44.5605	61.878	0	0.00065831	6.94299e-65	No	No	No
Afu1g16670	4.25083	0.551286	3.66411	1.15211	4.17258e-11	3585.35	8.02858e-11	Down	No	No
Afu1g16680	56.679	38.8158	54.8166	69.9077	3.17169e-28	2551.63	2.75368e-15	No	No	No
Afu1g16690	10.8614	7.37737	16.7661	16.6478	0.134315	3.37955e-05	5.41256e-08	No	No	No
Afu1g16700	11.1794	7.83301	13.5283	23.1403	5.78755e-05	4.06932	4.44668e-69	No	No	No
Afu1g16710	54.3784	40.0947	42.2418	106.691	4.25871e-12	1.0219e-07	1.39901e-152	No	No	No
Afu1g16720	47.8445	14.7394	37.6535	24.2367	1.0192e-89	0.00188989	9.22441e-58	No	No	No
Afu1g16730	11.5001	30.5193	11.9728	12.2965	1.04574e-74	5462.49	2172.94	No	No	No
Afu1g16740	3.30255	7.51794	3.58182	4.13939	0.56822	7949.06	2658.09	No	No	No
Afu1g16745	63.1181	34.9033	47.5871	42.5652	1.72507e-74	7.39515e-18	9.34842e-54	No	No	No
Afu1g16750	41.9209	142.149	46.8831	81.5618	2.33633e-226	235.641	3.14288e-69	No	No	No
Afu1g16760	103.174	226.37	106.724	67.9346	8.71866e-113	4038.89	2.64015e-25	No	No	No
Afu1g16770	15.0534	6.6759	14.7025	11.8416	2.84688e-18	7380.98	0.597375	No	No	No
Afu1g16780	60.0419	56.0421	60.6348	48.0344	245.101	7358.4	1.38971e-13	No	No	No
Afu1g16790	38.6486	36.4212	36.7148	40.0285	1456.99	2113.88	2962.83	No	No	No
Afu1g16800	33.3055	24.4763	38.7565	44.5531	5.01375e-12	0.0907561	8.42483e-22	No	No	No
Afu1g16810	16.2172	50.7658	27.5925	48.6675	1.88076e-102	1.50811e-14	4.83118e-125	No	No	No
Afu1g16820	35.793	47.1349	44.1441	43.271	0.0286686	4.86459	1.70976	No	No	No
Afu1g16830	15.1367	17.0916	15.8914	24.3313	75.5205	2919.53	5.61891e-37	No	No	No
Afu1g16840	1226.73	3269.07	1400.03	2193.36	0	2.07965e-22	0	No	No	No
Afu1g16850	46.2744	60.2709	56.3541	75.4865	4.83818e-07	0.0155502	6.52558e-48	No	No	No
Afu1g16860	9.2539	3.4058	11.029	8.47446	1.80141e-14	443.686	2423.72	No	No	No
Afu1g16870	77.1146	7.50738	89.7694	16.3354	0	0.00325124	0	Down	No	Down
Afu1g16880	4.4969	12.6389	4.91934	15.9976	8.80889e-73	2051.29	7.62574e-166	No	No	No
Afu1g16890	1.20125	1.50832	0.888292	2.10144	4199.05	3497.99	116.513	No	No	No
Afu1g16900	0.0613048	1.83459	0.0949842	0.0135598	4.87114e-05	9784	3223.23	Up	No	No
Afu1g16910	0.582941	1.09031	0.592722	0.886454	394.87	9784	1292.23	No	No	No
Afu1g16920	1.52342	1.60485	1.26019	2.68997	7812.07	3088.9	0.126978	No	No	No
Afu1g16930	0.531073	0.543342	0.502841	0.861419	9784	9784	2236.1	No	No	No
Afu1g16940	14.6938	39.4716	16.5657	16.3244	1.40167e-116	219.235	165.037	No	No	No
Afu1g16950	26.4738	19.7745	31.3722	40.2118	0.00224247	8.36986	2.90517e-21	No	No	No
Afu1g16960	5.14368	5.61672	5.51734	13.6744	6398.72	7027.05	1.15258e-10	No	No	No
Afu1g16970	88.865	100.932	103.613	131.576	11.3669	0.840747	1.34437e-32	No	No	No
Afu1g16980	52.7689	68.6351	63.6797	50.0571	2.32503e-11	0.000268081	729.835	No	No	No
Afu1g16990	25.1968	32.7712	20.4977	24.5147	0.0729174	15.6236	5889.03	No	No	No
Afu1g17000	32.9592	35.2782	44.5797	28.3524	2807.1	0.00399826	55.5382	No	No	No
Afu1g17010	6.08741	7.82549	6.79815	9.32025	894.157	4533.83	2.73087	No	No	No
Afu1g17020	27.8752	14.8796	23.5218	29.1209	3.66603e-29	2.97918	2421.05	No	No	No
Afu1g17030	14.6501	6.77113	17.1234	10.3939	5.48565e-15	247.315	0.000708487	No	No	No
Afu1g17040	285.073	59.0993	207.168	70.2642	0	7.04554e-50	0	Down	No	Down
Afu1g17050	0.952364	2.97529	1.10668	3.06947	0.344089	7190.65	0.0091763	No	No	No
Afu1g17060	0.763505	5.85858	1.66689	1.51989	1.17342e-12	276.688	248.926	Up	No	No
Afu1g17070	69.7878	130.369	83.8674	88.1035	9.78611e-62	0.0640754	4.85777e-08	No	No	No
Afu1g17080	14.4535	13.3656	27.5617	21.2104	4694.39	1.92676e-08	0.034617	No	No	No
Afu1g17090	26.582	65.3436	26.3428	24.5131	2.45601e-109	8437.49	502.248	No	No	No
Afu1g17100	30.0496	18.8115	20.5353	23.5752	2.33251e-09	1.23911e-05	0.00981663	No	No	No
Afu1g17110	23.0557	9.58535	21.4373	17.7976	9.34305e-51	1155.7	8.64222e-07	No	No	No
Afu1g17120	39.4692	40.1678	38.3281	38.0557	7804.9	6348.97	4862.05	No	No	No
Afu1g17130	5.77244	2.17289	5.2312	5.82985	0.312701	6248.13	9784	No	No	No
Afu1g17140	17.9816	153.734	17.8395	24.6592	0	9192.65	0.00105876	Up	No	No
Afu1g17150	27.3872	8.1532	20.4159	32.6172	7.84134e-84	2.36714e-05	0.0200207	No	No	No
Afu1g17160	0.256865	0.450513	0.227417	0.633083	2865.05	7843.77	156.14	No	No	No
Afu1g17170	1.05304	3.7259	1.85816	0.892855	0.000873805	473.748	4788.72	No	No	No
Afu1g17180	9.53268	0.223919	4.97347	0.376518	2.75931e-58	5.25459e-05	1.16383e-103	Down	No	Down
Afu1g17190	0.831505	1.72801	0.966235	0.26055	17.4344	5915.61	0.399756	No	No	No
Afu1g17200	13.5302	11.2626	12.9123	19.1864	1.30916e-09	502.386	1.61615e-76	No	No	No
Afu1g17210	0.0604006	0.46347	0.0467916	0.0534392	65.5912	9784	9784	No	No	No
Afu1g17220	0.702337	1.4924	0.878917	1.03963	198.537	5925.23	2359.96	No	No	No
Afu1g17230	3.88388	3.33783	4.74186	5.83475	2338.01	800.063	0.0967739	No	No	No
Afu1g17240	5.70578	4.68301	6.65827	6.84538	728.723	1386.62	367.417	No	No	No
Afu1g17250	1905.27	905.258	1818.32	1143.68	0	0.695797	0	No	No	No
Afu1g17260	90.853	24.9201	79.732	29.5883	1.00661e-146	5.07344	6.66344e-193	No	No	No
Afu1g17270	1.56871	1.79501	1.81223	1.28443	4375.98	4368.81	1740.93	No	No	No
Afu1g17280	41.6255	33.8099	34.6964	22.9659	0.264767	2.06349	4.42547e-38	No	No	No
Afu1g17290	8.99364	12.4956	6.12172	9.76289	1.30055	1.72108	2909.57	No	No	No
Afu1g17310	28.6804	3.01094	34.4882	4.2686	1.33154e-170	0.409642	3.21914e-248	Down	No	Down
Afu1g17320	0.88768	0.681141	0.962744	1.06025	4583.04	8489.97	5846.06	No	No	No
Afu1g17340	0.205787	0.0394765	0.199276	0.113793	1702.02	9784	2932.28	No	No	No
Afu1g17350	39.4328	29.9126	42.2924	52.444	3.4746e-09	458.048	1.69541e-20	No	No	No
Afu1g17360	23.1156	18.0109	32.3327	66.4039	15.3522	0.00977599	9.32878e-97	No	No	No
Afu1g17370	183.372	27.0589	117.381	16.405	4.57216e-144	1.52397e-13	0	Down	No	Down
Afu1g17380	2.15144	0.967746	1.43681	0.918923	103.911	1658.3	3.57737	No	No	No
Afu1g17390	11.2826	3.42022	12.841	18.9478	1.52277e-05	3841.46	0.0341217	No	No	No
Afu1g17400	23.0945	11.2088	27.5208	22.4425	4.14398e-31	2.13077	4719.32	No	No	No
Afu1g17410	24.7571	1.55076	16.5216	4.45839	4.42589e-237	4.1403e-13	2.17381e-250	Down	No	Down
Afu1g17420	1.71472	1.54795	2.10977	1.3163	8497.97	5341.33	3620.6	No	No	No
Afu1g17430	5.09462	2.29076	2.33788	2.04558	5.20385e-06	1.31776e-05	4.86673e-14	No	No	No
Afu1g17440	1.21192	1.35166	1.1572	8.09792	4362.04	7545.98	9.94317e-122	No	No	Up
Afu1g17460	8.58311	35.7768	7.63534	7.47321	1.24668e-115	1900.28	608.739	Up	No	No
Afu1g17470	1.77512	41.6549	3.70975	108.495	1.19976e-255	0.188408	0	Up	No	Up
Afu1g17480	25.9801	1.48669	14.8731	2.65895	5.15486e-153	5.57669e-15	8.19829e-226	Down	No	Down
Afu1g17490	28.8777	5.53967	18.0802	5.16221	1.19373e-139	1.07673e-17	4.94112e-251	Down	No	Down
Afu1g17500	0.372288	0.285666	0.288407	0.082345	9784	9784	9784	No	No	No
Afu1g17520	21.2949	2.56851	16.8555	1.18147	2.34134e-118	0.535101	4.17066e-292	Down	No	Down
Afu1g17530	19.8566	1.58383	15.2867	1.0318	1.46196e-112	0.520818	2.68393e-239	Down	No	Down
Afu1g17540	0.050433	0.0386986	0.0390698	0.0111551	4247.95	9784	1772.1	No	No	No
Afu1g17550	6.83387	5.32296	7.21198	2.32153	38.6397	5080.44	4.04333e-34	No	No	No
Afu1g17560	0.455018	1.10563	0.646244	0.285158	661.131	6133.86	2817.17	No	No	No
Afu1g17570	0.320846	0.738582	0.0677879	4.58704	141.792	122.807	1.50224e-42	No	No	Up
Afu1g17580	0.573676	0.135445	0.205117	0.819901	66.9982	357.955	2842.48	No	No	No
Afu1g17590	0.448049	0.24066	0.381807	0.327038	2217.17	8088.33	4168.51	No	No	No
Afu1g17600	0.119045	0.0913468	0.092223	0.0789938	9784	9784	9784	No	No	No
Afu1g17610	0.0671338	0.0515136	0.156023	0.564266	9784	2564.28	9.9009	No	No	No
Afu1g17620	9.10715	18.6664	4.97178	1.04099	6.45223e-11	0.017504	3.23368e-52	No	No	Down
Afu1g17630	0.39794	0.249832	0.448406	0.504109	3601.61	8291.58	5358.43	No	No	No
Afu1g17640	0.259785	0.0181218	0.164661	0.0104475	1.01114	3611.82	0.00365358	No	No	Down
Afu1g17650	1.41824	0.0680158	1.3047	0.176454	0.156831	8466.48	0.00501444	No	No	Down
Afu1g17660	1.5427	0.0358713	0.615662	0.0103401	1.07993e-08	15.6382	3.18834e-21	Down	No	Down
Afu1g17670	0.0867619	0.0221916	0.0672134	0.00639686	800.767	9784	200.948	No	No	No
Afu1g17680	2.21665	0.0288287	2.47395	0.0997206	1.40922e-16	5447.95	1.9783e-28	Down	No	Down
Afu1g17690	0.544811	0.0696747	0.105515	0.0803366	17.7565	68.3678	0.357989	No	No	No
Afu1g17700	7.73889	0.185571	7.24423	1.46211	4.67737e-27	6151.81	7.08807e-23	Down	No	Down
Afu1g17710	0.0476182	0.0365387	0.0368892	0.0105325	9784	9784	9784	No	No	No
Afu1g17720	0.0825638	0.0633534	0.0639611	0.018262	9784	9784	9784	No	No	No
Afu1g17723	0.0581699	0.0446353	0.0450635	0.0128664	9784	9784	9784	No	No	No
Afu1g17725	0.03696	0.0283604	0.0286324	0.00817505	9784	9784	9784	No	No	No
Afu1g17730	0.169222	0.302979	0.349584	0.187148	5181.76	3599.77	9784	No	No	No
Afu1g17740	0.00853871	0.00655198	0.00661483	0.00188865	9784	9784	9784	No	No	No
Afu1g17750	0.0581699	0.0446353	0.0450635	0.0128664	9784	9784	9784	No	No	No
Afu2g00090	0.0400701	0.122987	0.0620836	0.15067	3879.14	9784	2227.65	No	No	No
Afu2g00100	252.362	49.8025	161.02	28.0034	0	5.35209e-182	0	Down	No	Down
Afu2g00110	2.43233	0.746558	3.11766	1.02709	0.00778244	1529.19	0.00868128	No	No	No
Afu2g00120	2.25531	0.318787	2.66672	0.695756	0.000207114	4615.39	0.00146552	Down	No	No
Afu2g00130	0.0882578	0.0677226	0.136744	0.0292822	9784	6871.98	2197.29	No	No	No
Afu2g00140	1.18833	0.397467	0.967793	0.188707	1.12085	3610	2.89716e-09	No	No	Down
Afu2g00150	0.877535	0.336678	0.849769	0.291148	558.029	9784	65.2323	No	No	No
Afu2g00160	0.100866	0.0773973	0.0781397	0.0223102	9784	9784	9784	No	No	No
Afu2g00170	0.281133	0.0359534	0.290386	0.0621827	65.5384	9784	117.267	No	No	No
Afu2g00180	1.65416	10.0513	2.00877	1.24596	2.66866e-33	3993.19	1250.09	Up	No	No
Afu2g00190	0.131255	0.100716	0.101682	0.0290319	9784	9784	9784	No	No	No
Afu2g00200	2.46138	0.0547444	1.43701	0.149914	7.93342e-19	32.199	1.31324e-30	Down	No	Down
Afu2g00210	111.233	15.0554	124.444	18.0714	0	0.478936	0	Down	No	Down
Afu2g00220	61.9735	12.27	71.1238	23.3091	6.62829e-235	0.203717	1.59575e-183	Down	No	No
Afu2g00230	2.93985	1.86007	3.55605	0.5704	220.46	2726.13	2.78421e-12	No	No	Down
Afu2g00240	20.7452	42.4318	19.6714	3.11367	4.81341e-25	4778.33	2.63976e-93	No	No	Down
Afu2g00250	8.87518	2.89566	12.6682	2.64319	4.94944e-09	11.5802	1.35935e-18	No	No	No
Afu2g00260	2.86221	0.633534	2.68637	0.36524	0.000162676	7613.17	1.60675e-15	Down	No	Down
Afu2g00270	2.14764	0.786518	2.13641	1.10121	0.000361592	9784	0.00588471	No	No	No
Afu2g00300	26.1114	10.5225	31.2881	15.4567	9.52832e-07	948.937	0.00482663	No	No	No
Afu2g00310	93.1103	48.1085	98.4231	69.3144	2.10529e-101	304.164	2.04407e-34	No	No	No
Afu2g00320	10.116	2.19776	21.7163	17.0645	1.13314e-20	9.6598e-15	1.81954e-07	Down	No	No
Afu2g00330	104.48	7.23833	63.1031	5.04318	0	4.56879e-55	0	Down	No	Down
Afu2g00340	2.27996	1.14389	3.80425	1.64866	15.1881	20.1827	438.031	No	No	No
Afu2g00350	2.69025	1.43354	4.39978	1.25621	188.846	164.804	3.1123	No	No	No
Afu2g00360	20.855	22.6946	21.1765	12.3746	1111.07	7704.68	9.45872e-22	No	No	No
Afu2g00370	42.601	43.6816	48.5363	102.566	4193.17	0.178432	0	No	No	No
Afu2g00380	1.97275	0.57418	3.05653	1.59492	3.07777	640.809	3075.14	No	No	No
Afu2g00390	0.071845	0.0551286	0.111315	0.0158911	9784	9784	1772.1	No	No	No
Afu2g00400	0.145013	0.333817	0.134808	0.0256599	1135.04	9784	125.577	No	No	No
Afu2g00410	13.1524	7.22506	11.2542	3.92732	2.93196e-12	182.263	6.71844e-70	No	No	No
Afu2g00420	1.62414	0.623125	1.7525	0.718478	27.6027	7887.94	8.81923	No	No	No
Afu2g00430	0.0403464	0.0309589	0.0625118	0.0580066	9784	6871.98	9784	No	No	No
Afu2g00440	17.3691	1.51699	8.86104	3.71688	5.44705e-26	0.0187633	1.10063e-26	Down	No	Down
Afu2g00450	0.192804	0.562187	0.0896178	10.9344	363.465	3017.26	4.68246e-98	No	No	Up
Afu2g00460	0.43381	0.0665748	1.20984	0.99791	899.089	354.235	814.481	No	No	No
Afu2g00470	0.440867	0.0375877	0.41743	0.0975138	32.6796	9784	20.4151	No	No	No
Afu2g00480	0.186144	0.047611	0.336474	0.0411725	800.767	5176.18	754.062	No	No	No
Afu2g00490	0.353031	0.0902968	0.182326	0.104114	800.767	6448.5	1146.16	No	No	No
Afu2g00500	13.8895	2.44098	29.9545	4.03346	3.64836e-48	3.11573e-30	1.92564e-50	Down	No	No
Afu2g00510	0.371323	0.0407037	0.410942	0.0586655	243.957	9784	21.0319	No	No	No
Afu2g00520	43.0929	2.41323	49.6606	12.7433	2.46357e-168	54.5572	1.36714e-104	Down	No	No
Afu2g00530	4.91912	0.377457	8.2408	1.31925	7.52888e-17	1.01424	1.12054e-12	Down	No	No
Afu2g00540	1.37758	0.480478	2.81351	1.70356	63.3178	32.2097	3817.21	No	No	No
Afu2g00550	0.273011	3.35182	0.105749	0.0301932	0.0192414	1864.33	846.631	Up	No	No
Afu2g00560	0.0496986	1.79235	0.231005	0.0439706	2.67124e-08	380.87	9784	Up	No	No
Afu2g00570	24.0228	664.59	29.4765	22.8588	0	56.0922	4238.49	Up	No	No
Afu2g00580	3.9888	1069.82	16.4804	1.58808	0	9.36951e-05	73.1931	Up	Up	No
Afu2g00590	9.37758	162.992	9.4641	3.21595	0	9288.71	2.03685e-12	Up	No	No
Afu2g00600	0.102894	1.26325	0.0797103	0.0910347	1.42095	9784	9784	No	No	No
Afu2g00620	0.0993972	0.266945	0.0770017	0.0109927	3086.3	9784	320.966	No	No	No
Afu2g00625	0.478407	0.0734189	0.370616	0.0423269	899.089	7396.06	28.8979	No	No	No
Afu2g00630	2.26863	0.178541	2.74887	0.18013	1.21631e-06	3578.83	1.7869e-14	Down	No	Down
Afu2g00640	45.3041	0.8612	24.7054	1.19279	0	1.02329e-53	0	Down	No	Down
Afu2g00650	2.79794	1.04094	2.79151	0.993937	0.0194692	9784	4.52714e-06	No	No	No
Afu2g00656	0.12261	0.752654	0.854858	0.325435	856.097	494.638	4750.33	No	No	No
Afu2g00660	31.7123	28.3153	37.3496	27.5248	6.31476	0.00143677	0.00268059	No	No	No
Afu2g00670	4.97909	5.02257	8.19122	7.43692	9784	0.785134	2.43022	No	No	No
Afu2g00680	17.045	17.9681	17.128	34.5937	4718.13	9490.62	7.2758e-35	No	No	No
Afu2g00690	5.50774	0.447484	4.29187	0.171986	5.84003e-38	213.618	1.76362e-94	Down	No	Down
Afu2g00700	2.1329	0.163663	1.98279	0.0471768	2.32889	9784	0.00341577	No	No	Down
Afu2g00710	3.99132	0.248996	3.31827	0.0861295	4.45419e-29	1434.35	2.25896e-72	Down	No	Down
Afu2g00720	156.787	38.4346	129.151	185.118	0	1.44143e-13	1.50586e-17	Down	No	No
Afu2g00730	49.5866	20.6711	46.4254	14.2617	2.60888e-57	1333.5	3.18917e-162	No	No	No
Afu2g00740	246.134	80.65	141.823	35.4144	0	3.56266e-114	0	No	No	Down
Afu2g00750	8.02203	3.14233	7.17066	4.02024	1.98041e-07	3221.87	5.32837e-07	No	No	No
Afu2g00760	1.58974	1.07347	3.30055	9.46584	1834.29	14.5211	1.24954e-27	No	No	Up
Afu2g00770	7.53399	6.38396	12.8546	12.8099	1247.13	6.25244e-05	1.11796e-07	No	No	No
Afu2g00780	39.0865	151.765	39.169	38.8236	0	9449.41	8261.42	No	No	No
Afu2g00790	30.9518	17.7822	18.9365	8.95263	0.00416979	0.0515656	4.53552e-31	No	No	No
Afu2g00800	2.26909	0.580377	2.13451	2.18681	0.0217483	8164.95	7783.85	No	No	No
Afu2g00810	1.92594	0.894475	1.13863	0.246627	40.151	351.159	1.23713e-10	No	No	Down
Afu2g00820	2.03832	2.02616	2.18915	1.04515	9784	7516.57	4.94584	No	No	No
Afu2g00830	69.9109	3.7149	51.3032	4.05741	0	1.13383e-13	0	Down	No	Down
Afu2g00840	130.588	1.78332	80.212	2.18915	0	4.20489e-73	0	Down	No	Down
Afu2g00850	29.8335	22.3944	27.3464	49.2039	3.08866	2486.35	3.8155e-15	No	No	No
Afu2g00860	14.8123	0.835726	10.7999	2.84265	2.07119e-15	772.128	2.78789e-15	Down	No	Down
Afu2g00870	98.531	5.90554	65.1056	3.05785	0	1.1201e-33	0	Down	No	Down
Afu2g00880	4.31598	3.15773	4.87275	9.42797	129.247	3015.06	7.73167e-17	No	No	No
Afu2g00890	11.9163	12.8784	11.9618	12.399	6300.67	9784	7794.31	No	No	No
Afu2g00900	0.0641875	0.541781	0.149176	0.0709871	34.1286	2564.28	5799.86	No	No	No
Afu2g00910	0.516592	0.234233	1.63717	4.63285	251.1	0.00146978	2.924e-46	No	No	Up
Afu2g00920	1.80517	3.52226	1.798	6.57101	5.35584	9784	2.93369e-15	No	No	No
Afu2g00930	2.23518	4.47154	2.44274	2.41898	0.0468558	6502.73	6534.76	No	No	No
Afu2g00940	6.73129	93.1611	7.94483	5.30069	0	791.397	41.1713	Up	No	No
Afu2g00960	15.2086	6.45061	14.5112	23.4859	6.96865e-24	4667.93	3.91702e-15	No	No	No
Afu2g00963	15.3887	5.90406	12.4633	16.3718	5.60629e-15	202.973	3971.43	No	No	No
Afu2g00967	200.185	93.3926	211.444	105.661	1.13369e-93	668.245	2.56632e-107	No	No	No
Afu2g00970	21.8562	21.7138	32.4822	23.2301	9251.09	2.15969e-06	2871.43	No	No	No
Afu2g00980	3.48089	29.695	4.0449	3.39673	1.77054e-52	5029.05	9037.38	Up	No	No
Afu2g00990	31.6025	7.83056	37.5392	6.88812	6.09564e-57	34.0755	1.43562e-108	Down	No	Down
Afu2g01000	5.84659	1.93947	5.43909	3.28661	5.461e-18	4102.54	1.51188e-08	No	No	No
Afu2g01010	183.058	169.186	395.64	1001.47	0.57162	0	0	No	No	Up
Afu2g01030	162.698	136.57	238.297	318.706	2.49556e-07	1.20328e-57	2.66442e-292	No	No	No
Afu2g01040	149.527	155.463	180.789	511.154	1191.08	4.0186e-11	0	No	No	No
Afu2g01050	163.357	189.921	253.1	161.55	16.4658	8.8655e-19	7718.02	No	No	No
Afu2g01060	61.7627	61.7808	47.5685	39.2882	9784	8.73849e-17	7.22238e-77	No	No	No
Afu2g01070	23.4991	24.3583	35.3975	43.542	6052.96	4.10338e-06	1.9948e-27	No	No	No
Afu2g01080	136.801	39.4631	72.3095	58.4034	0	3.97624e-134	0	No	No	No
Afu2g01090	65.1249	22.9979	47.4135	24.0327	2.37081e-186	1.97159e-22	3.7378e-278	No	No	No
Afu2g01100	24.7416	35.2421	11.8968	5.11082	0.000701137	8.99758e-14	3.71939e-82	No	No	Down
Afu2g01110	11.7778	15.1368	12.1547	9.10398	8.19289	6799.46	1.96141	No	No	No
Afu2g01120	33.7165	41.4381	30.699	22.9691	0.141714	676.029	6.63186e-14	No	No	No
Afu2g01130	76.319	103.221	94.0205	140.398	1.59202e-05	0.460756	7.88422e-50	No	No	No
Afu2g01140	84.9857	47.0786	118.2	83.3234	2.22192e-35	8.08667e-16	5329.65	No	No	No
Afu2g01150	48.0989	7.41115	59.2594	21.8972	7.23255e-86	2.54699	1.93194e-38	Down	No	No
Afu2g01160	60.5951	9.89961	64.0298	23.0315	4.94202e-122	2579.51	1.98103e-81	Down	No	No
Afu2g01170	568.532	144.63	387.735	308.46	0	4.09838e-186	0	No	No	No
Afu2g01180	9.85134	24.5339	9.96952	17.9559	1.84697e-60	8486.82	5.0808e-30	No	No	No
Afu2g01190	31.5071	213.412	38.5145	212.795	0	13.4372	0	Up	No	Up
Afu2g01200	42.4928	180.114	41.1483	89.149	0	3393.66	1.71363e-201	Up	No	No
Afu2g01210	133.761	211.37	136.06	291.093	1.23565e-100	4644.97	0	No	No	No
Afu2g01220	199.594	72.1754	224.127	137.345	0	3.36118e-05	5.35865e-92	No	No	No
Afu2g01230	15.2952	3.36002	17.869	5.67486	1.22353e-31	562.922	2.13987e-27	Down	No	No
Afu2g01240	13.7168	3.50843	27.5974	26.954	8.38643e-39	1.38538e-26	1.66454e-34	No	No	No
Afu2g01250	3.2699	1.04545	5.72975	3.28049	2.46637e-05	0.134154	9784	No	No	No
Afu2g01260	26.0451	9.26177	26.464	35.8197	7.03473e-99	6661.5	1.45249e-23	No	No	No
Afu2g01270	89.923	16.183	83.1452	6.23489	0	30.3298	0	Down	No	Down
Afu2g01280	15.1673	0.850488	14.371	2.39997	1.65004e-66	5180.29	1.44427e-75	Down	No	Down
Afu2g01290	11.2107	10.4503	11.9059	11.6209	495.254	845.027	2160.89	No	No	No
Afu2g01300	31.7045	72.9831	37.4386	48.65	1.74214e-34	293.926	9.6012e-09	No	No	No
Afu2g01310	156.275	53.2751	162.331	75.2053	1.13102e-167	1997.55	5.56264e-141	No	No	No
Afu2g01320	151.749	34.2892	159.49	18.7533	0	7.15421	0	Down	No	Down
Afu2g01330	27.6014	66.8059	27.6005	35.8876	2.72745e-47	9784	0.0495396	No	No	No
Afu2g01340	0.292512	0.224452	0.45321	0.646997	9784	4970.86	2207.27	No	No	No
Afu2g01350	36.2839	17.3353	44.3567	21.6469	8.2638e-53	0.000682159	2.77995e-43	No	No	No
Afu2g01360	40.2012	32.3281	33.4687	39.1484	27.5179	111.153	6305	No	No	No
Afu2g01370	10.0234	1.52627	6.52623	1.01794	1.87195e-43	0.0324707	1.47307e-97	Down	No	Down
Afu2g01380	8.43784	9.15074	10.8073	3.2101	5877.25	978.819	3.94e-06	No	No	No
Afu2g01390	62.0125	15.9361	53.932	12.7027	2.81783e-73	104.737	5.90368e-153	No	No	Down
Afu2g01400	16.0467	9.41584	17.1561	7.93374	0.00159788	4454.24	1.45108e-12	No	No	No
Afu2g01405	12.0661	8.13639	12.0384	5.58034	290.05	9784	0.00985358	No	No	No
Afu2g01410	194.306	90.2833	130.213	34.3932	2.62145e-157	2.02527e-49	0	No	No	Down
Afu2g01420	6.764	7.08011	7.00564	5.35021	6491.1	7179.57	61.457	No	No	No
Afu2g01430	339.299	188.742	284.666	262.646	3.26606e-204	3.44101e-20	3.82032e-66	No	No	No
Afu2g01440	14.4221	33.1994	26.1154	16.8557	8.7982e-29	1.41116e-11	253.933	No	No	No
Afu2g01450	35.0867	53.1748	38.1015	38.758	2.01842e-15	980.624	171.167	No	No	No
Afu2g01460	66.658	22.2215	59.6939	62.0512	9.8071e-90	93.3926	370.267	No	No	No
Afu2g01470	36.4569	13.7956	34.2395	37.8335	3.28407e-08	5629.23	7031.4	No	No	No
Afu2g01480	72.2576	199.317	85.6043	54.4974	5.12516e-174	1.09615	1.66801e-08	No	No	No
Afu2g01490	0.708778	0.483435	0.915136	1.28902	4593.18	6669.68	863.632	No	No	No
Afu2g01500	15.2283	14.412	14.3862	14.9349	1902.81	1820.74	5619.6	No	No	No
Afu2g01510	28.8732	16.3001	31.7544	20.3125	8.30097e-21	462.085	3.14648e-12	No	No	No
Afu2g01520	10.0959	9.92601	10.6372	14.281	7286.37	2947.71	3.46506e-15	No	No	No
Afu2g01530	77.0158	230.937	67.9531	64.0657	0	4.08999	4.94453e-06	No	No	No
Afu2g01540	50.4404	62.3782	42.4501	48.6834	7.60379e-09	0.00119248	1718.35	No	No	No
Afu2g01550	62.8291	68.832	70.9557	89.946	246.479	25.9932	5.2522e-25	No	No	No
Afu2g01570	135.498	255.921	155.856	199.883	1.81168e-64	6.53412	1.0001e-28	No	No	No
Afu2g01580	23.9181	16.7363	24.0924	15.0703	2.83634e-08	8691.01	2.08383e-23	No	No	No
Afu2g01590	81.7869	28.5666	81.2946	60.2148	1.06034e-55	8999.56	4.06979e-08	No	No	No
Afu2g01600	11.0988	7.94729	10.486	12.6436	0.0225527	3818	137.65	No	No	No
Afu2g01610	36.7238	45.0994	34.0366	55.2095	6.81831	2393.48	4.61524e-13	No	No	No
Afu2g01620	118.049	35.6451	90.4262	33.4744	1.10829e-166	1.12832e-10	3.62099e-293	No	No	No
Afu2g01630	36.0014	32.4017	53.7461	32.9802	896.911	4.70983e-09	873.788	No	No	No
Afu2g01640	155.503	377.55	177.117	259.738	0	7.35855e-05	1.30587e-187	No	No	No
Afu2g01650	25.6311	12.5359	26.4373	19.2883	1.60592e-13	6587.86	0.0445371	No	No	No
Afu2g01660	49.4859	64.0169	52.9416	61.5467	9.25823e-12	437.126	9.60044e-12	No	No	No
Afu2g01670	90.3478	93.4464	96.0493	121.17	1456.83	84.1733	4.82792e-53	No	No	No
Afu2g01680	6.38493	0.641981	11.5983	1.16877	2.38887e-29	6.49207e-06	1.05011e-36	Down	No	Down
Afu2g01690	3.98271	3.66725	4.39209	3.3475	5926.74	5160.4	1538.43	No	No	No
Afu2g01700	52.84	45.7696	52.7613	76.3309	0.0228806	9439.34	4.70508e-55	No	No	No
Afu2g01710	21.4801	206.349	43.5675	44.1791	0	6.71591e-31	1.89394e-45	Up	No	No
Afu2g01720	64.5181	998.109	68.0884	237.13	0	677.049	0	Up	No	No
Afu2g01730	10.0447	8.59694	10.1759	6.28075	2431.67	9276.89	0.664722	No	No	No
Afu2g01740	10.7521	10.1157	11.9511	10.4849	4929.12	2278.63	7244	No	No	No
Afu2g01750	1498.99	366.095	1408.59	702.481	0	2.47904e-13	0	Down	No	No
Afu2g01760	5.11182	3.14087	9.63836	7.48723	4.93962e-10	1.21457e-33	7.56256e-14	No	No	No
Afu2g01770	56.0355	25.9242	37.726	9.76749	5.747e-81	7.51767e-24	0	No	No	Down
Afu2g01780	28.3946	77.9795	27.0799	17.9491	1.66559e-151	3301.8	1.80866e-21	No	No	No
Afu2g01790	23.1527	8.46843	18.209	14.1634	7.4874e-74	0.000894151	5.70597e-33	No	No	No
Afu2g01800	3.58992	8.11088	5.56213	10.1461	0.000507519	85.8602	2.22873e-13	No	No	No
Afu2g01810	86.3545	59.0515	116.171	230.387	1.38806e-10	1.80484e-08	3.45155e-221	No	No	No
Afu2g01820	24.4799	26.9291	24.6329	27.0697	38.5354	8475.53	2.54411	No	No	No
Afu2g01830	51.5068	85.728	86.0589	63.1122	3.33627e-34	9.87062e-35	0.000120387	No	No	No
Afu2g01840	34.5971	18.2235	39.4819	36.7145	9.14106e-18	184.761	2135.97	No	No	No
Afu2g01850	81.6481	48.0649	110.048	76.654	4.09592e-32	8.11082e-14	416.113	No	No	No
Afu2g01860	62.1335	36.5025	77.6709	70.8043	1.07995e-16	0.0279542	13.5957	No	No	No
Afu2g01870	44.7866	21.9584	45.2937	33.687	1.0892e-86	6949.59	1.25328e-23	No	No	No
Afu2g01880	44.7784	75.2405	45.739	63.1638	3.9414e-36	6293.29	1.69764e-19	No	No	No
Afu2g01890	25.6345	14.1892	46.6648	31.6151	4.00451e-08	1.18007e-16	4.16469	No	No	No
Afu2g01900	35.5296	59.4097	37.073	41.9899	9.23463e-42	2949.56	0.00433347	No	No	No
Afu2g01910	36.5856	32.8538	26.4043	26.3808	1.57343	1.99433e-23	2.19864e-36	No	No	No
Afu2g01920	72.235	382.325	72.7283	158.466	0	7978.75	0	Up	No	No
Afu2g01930	66.9092	43.3926	74.7842	51.4859	5.20422e-29	4.83426	4.12116e-16	No	No	No
Afu2g01940	27.1003	23.4134	31.7558	25.1136	59.3969	14.2136	739.841	No	No	No
Afu2g01950	5.99842	4.53354	5.13605	5.27715	247.043	2013.76	1853.65	No	No	No
Afu2g01960	4.15367	7.18247	3.12715	1.31987	0.82914	1028.97	2.59385e-08	No	No	No
Afu2g01970	9.70133	16.7657	11.107	10.8714	1.98596e-08	1223.27	1201.62	No	No	No
Afu2g01980	13.2335	36.3713	16.5147	16.0191	2.42762e-110	0.403902	0.284619	No	No	No
Afu2g01990	212.363	118.174	202.812	132.505	2.88257e-44	1919.12	8.29313e-46	No	No	No
Afu2g02000	25.936	41.2867	35.1322	67.3308	1.83712e-20	1.70506e-06	2.27853e-161	No	No	No
Afu2g02010	177.42	77.2311	156.808	98.4281	8.50177e-180	0.00383996	2.03486e-154	No	No	No
Afu2g02020	37.5721	5.79653	70.9956	6.34276	1.89487e-131	9.934e-49	2.51937e-213	Down	No	Down
Afu2g02030	2.70868	1.23298	3.52102	1.72629	2.24569	1245.12	43.3908	No	No	No
Afu2g02040	5.14777	1.14963	4.6724	1.31706	8.43008e-16	3999.64	3.73586e-24	Down	No	No
Afu2g02050	67.9425	38.2709	147.342	138.219	4.5492e-36	4.23252e-130	2.84772e-146	No	No	No
Afu2g02060	50.4189	34.4642	76.8386	49.6726	0.000249789	8.21879e-10	7583.24	No	No	No
Afu2g02070	45.8315	65.4019	40.3072	52.2692	2.09291e-23	4.90478	0.0564108	No	No	No
Afu2g02080	31.1589	631.046	73.1814	289.658	0	2.89456e-40	0	Up	No	Up
Afu2g02090	20.4758	18.0008	38.868	15.8364	2566.88	7.07388e-08	59.8028	No	No	No
Afu2g02100	125.086	107.078	143.255	174.225	2.84629e-06	3.82029e-05	5.50073e-68	No	No	No
Afu2g02110	13.5895	6.66129	15.0394	11.6911	3.79657e-14	1364.36	102.111	No	No	No
Afu2g02120	29.9804	18.2102	29.6113	26.7716	1.92214e-22	7531.36	13.2755	No	No	No
Afu2g02130	52.4195	31.1457	76.6774	52.4513	1.75083e-35	1.24998e-28	9784	No	No	No
Afu2g02140	12.2274	108.912	12.9374	16.2979	0	3800.91	0.000189924	Up	No	No
Afu2g02150	735.554	2579.13	643.036	1123.57	0	2.3327e-06	4.60308e-157	No	No	No
Afu2g02160	41.9889	40.0308	41.4564	31.3884	2401.42	7452.13	1.7929e-12	No	No	No
Afu2g02165	45.3645	30.3397	45.0801	42.8561	2.47831e-10	8848.33	1506.88	No	No	No
Afu2g02170	52.4959	33.9075	40.5689	64.0746	1.65882e-68	2.01483e-24	4.09578e-26	No	No	No
Afu2g02180	14.4765	53.7065	19.5333	23.7122	2.86282e-130	0.117106	3.06731e-15	No	No	No
Afu2g02190	8.85115	21.4485	8.16472	8.23644	5.62662e-52	2498.97	2077.71	No	No	No
Afu2g02210	46.0032	101.092	37.8818	29.5575	8.48209e-74	2.79272	8.25315e-18	No	No	No
Afu2g02220	83.2576	67.2718	78.1949	131.556	1.00495e-26	4.45293	8.41639e-254	No	No	No
Afu2g02230	169.472	173.438	169.943	212.752	4615.81	9155.56	6.59147e-15	No	No	No
Afu2g02240	52.3921	26.7347	58.7663	74.1458	2.12756e-30	122.474	1.47602e-17	No	No	No
Afu2g02250	27.4754	36.9486	35.9318	39.5596	4.15632e-06	0.000201987	2.27272e-16	No	No	No
Afu2g02260	2.94012	5.35807	3.37584	3.37931	1.2128	4330.09	3573.63	No	No	No
Afu2g02270	81.9033	103.366	144.709	101.028	0.846799	1.63362e-21	0.262076	No	No	No
Afu2g02275	658.403	430.174	740.061	660.684	9.75811e-32	0.969215	8888.26	No	No	No
Afu2g02280	33.4079	32.0665	41.2792	33.6098	6155.07	54.2048	9269.34	No	No	No
Afu2g02290	19.4294	33.7408	29.7719	22.0137	1.15672e-37	3.89505e-20	9.91177	No	No	No
Afu2g02300	83.5335	46.0842	77.3921	85.9063	7.9156e-40	429.714	3599.58	No	No	No
Afu2g02310	131.145	62.2741	122.211	214.512	1.62541e-73	379.389	6.43199e-81	No	No	No
Afu2g02320	60.8547	230.621	58.2637	96.5179	0	1812.99	2.66662e-75	No	No	No
Afu2g02330	6.17525	18.4549	4.28032	6.32619	0.0457657	3073.29	9784	No	No	No
Afu2g02340	71.0325	53.591	85.1376	66.0242	9.79314e-06	0.1167	435.672	No	No	No
Afu2g02350	18.0179	39.3119	16.4916	20.4939	9.97214e-90	586.956	5.54284	No	No	No
Afu2g02360	21.2327	66.0037	18.5061	20.1826	0	0.902663	733.186	No	No	No
Afu2g02370	4.99134	4.22169	3.77884	2.53422	2605.22	655.235	0.00376215	No	No	No
Afu2g02380	98.5285	59.3705	59.4838	17.9756	7.92949e-52	2.93195e-51	0	No	No	Down
Afu2g02390	19.6768	10.0401	23.368	6.60568	1.7663e-05	627.881	2.73571e-25	No	No	No
Afu2g02400	35.8327	57.9509	36.7248	35.3621	5.86434e-15	6806.27	7641.5	No	No	No
Afu2g02410	10.8401	19.7166	7.46464	9.94599	78.9312	1999.52	6460.32	No	No	No
Afu2g02420	88.9204	70.9232	91.3519	85.3048	4.39473e-16	2451.11	331.361	No	No	No
Afu2g02430	71.5714	128.432	103.033	143.722	6.7304e-19	5.86082e-05	1.85895e-41	No	No	No
Afu2g02440	111.081	82.8789	95.4385	224.448	0.00177628	49.5618	5.28048e-74	No	No	No
Afu2g02450	17.8537	11.155	19.5367	20.0947	1.15175e-07	1364.6	197.101	No	No	No
Afu2g02460	5.28233	5.03525	2.80544	2.68607	6152.28	0.000137829	7.66498e-10	No	No	No
Afu2g02470	104.384	101.448	103.272	96.5231	1555.69	5863.89	0.0383975	No	No	No
Afu2g02480	66.0635	17.8461	43.3372	24.7299	3.05918e-94	6.54796e-13	1.15007e-98	No	No	No
Afu2g02485	6.2444	4.4572	5.73745	1.09209	1463.15	6644.55	1.32991e-09	No	No	Down
Afu2g02490	42.2752	478.697	35.3435	36.7656	0	26.3156	41.2818	Up	No	No
Afu2g02500	50.4368	82.8905	57.851	23.2776	1.57802e-23	59.1353	7.93558e-51	No	No	No
Afu2g02510	6.68744	6.41158	6.00914	9.97888	4839.66	911.457	2.52092e-13	No	No	No
Afu2g02520	33.0185	15.1029	32.2651	42.7182	5.64767e-123	3889.69	2.1609e-29	No	No	No
Afu2g02530	409.351	459.481	431.567	567.352	1.29404e-10	5.23161	1.09812e-158	No	No	No
Afu2g02540	76.362	46.9794	94.4936	74.5712	9.09993e-24	0.000162914	4651.27	No	No	No
Afu2g02550	118.13	93.6106	138.269	140.525	1.85433e-07	0.00662535	4.45969e-07	No	No	No
Afu2g02560	91.6611	113.014	76.3019	130.876	2.8759e-22	3.09155e-13	7.72346e-105	No	No	No
Afu2g02570	34.4145	25.8268	30.511	23.087	0.00395228	265.397	3.35795e-13	No	No	No
Afu2g02580	35.2469	62.6512	50.9805	39.2061	6.04797e-35	1.93316e-11	98.6385	No	No	No
Afu2g02590	83.45	356.705	89.183	168.607	0	159.115	6.12066e-263	Up	No	No
Afu2g02600	18.0614	23.6209	16.0422	20.4882	0.224348	855.788	217.262	No	No	No
Afu2g02610	98.7878	123.143	124.532	122.187	6.63928e-10	3.30803e-11	7.46145e-14	No	No	No
Afu2g02620	84.8647	113.531	87.3959	49.5817	6.59221e-34	2190.38	1.19669e-123	No	No	No
Afu2g02630	77.2414	47.9766	103.389	76.75	1.6665e-16	9.27522e-08	8451.57	No	No	No
Afu2g02640	20.2447	3.58211	19.5863	3.86445	1.29661e-68	5943.01	2.49966e-111	Down	No	Down
Afu2g02650	12.4271	7.60564	12.7447	10.6281	2.57486e-13	6131.49	3.68348	No	No	No
Afu2g02660	13.1955	10.3996	12.992	9.05795	7.10723	7986.63	1.7287e-06	No	No	No
Afu2g02670	76.5353	50.7019	73.91	85.7445	1.76926e-21	3304.64	0.944591	No	No	No
Afu2g02680	59.3937	66.9075	91.0922	83.0346	0.0305116	1.18278e-68	1.26353e-56	No	No	No
Afu2g02690	104.367	78.19	107.195	58.6593	9.76173e-39	1701.16	5.66497e-214	No	No	No
Afu2g02700	113.197	154.152	217.584	120.445	1.51031e-05	8.10724e-40	1709.56	No	No	No
Afu2g02710	107.038	314.15	136.634	99.6375	2.17236e-234	1.0541e-05	435.554	No	No	No
Afu2g02720	34.1849	23.2303	40.4048	25.4536	1.65556e-09	2.90345	2.03005e-08	No	No	No
Afu2g02730	27.8261	22.8289	38.7408	32.9125	3.59916	1.39786e-07	0.780669	No	No	No
Afu2g02740	47.0944	52.7911	90.3097	38.2246	1015.19	3.14017e-22	7.43393	No	No	No
Afu2g02750	49.8092	57.6388	51.5527	42.4528	8.35944	4364.63	0.358914	No	No	No
Afu2g02760	46.8546	31.4031	66.0421	62.4847	9.93177e-27	4.34796e-28	3.28083e-27	No	No	No
Afu2g02770	18.5886	6.80475	18.8179	14.9515	2.82408e-68	7753.01	0.000102624	No	No	No
Afu2g02780	144.711	179.492	138.84	160.473	1.20352e-13	1197.24	0.0178336	No	No	No
Afu2g02810	51.3306	10.6476	52.2628	19.1515	8.57483e-129	6775.83	9.90589e-106	Down	No	No
Afu2g02820	256.224	217.84	288.523	285.407	0.124475	6.51905	2.09655	No	No	No
Afu2g02830	58.1263	48.2645	62.5164	46.2765	0.0136598	457.814	1.06725e-08	No	No	No
Afu2g02840	53.3138	36.8893	64.8105	50.4052	3.66559e-21	3.51885e-06	396.639	No	No	No
Afu2g02850	46.6731	44.7351	43.511	47.9347	1095.8	90.4646	2234.54	No	No	No
Afu2g02860	125.302	55.4871	141.432	82.6849	2.11941e-244	4.3563e-06	1.21195e-114	No	No	No
Afu2g02870	13.3093	46.3493	22.4056	31.3915	1.68623e-70	2.10582e-06	2.31048e-36	No	No	No
Afu2g02880	28.2017	18.935	29.0265	80.3403	2.48182e-19	4275.71	0	No	No	No
Afu2g02890	76.4155	716.215	90.5572	74.3822	0	0.0190702	3763.08	Up	No	No
Afu2g02910	20.6891	9.54701	25.8314	22.2675	1.83472e-12	29.6484	2654.59	No	No	No
Afu2g02920	48.9102	30.5932	40.464	46.8963	2.28137e-11	6.54773	3294.83	No	No	No
Afu2g02930	48.3198	62.549	52.0934	60.0432	0.00276182	1549.86	0.00333805	No	No	No
Afu2g02940	29.6361	23.4296	26.5764	34.2057	309.927	3036.42	943.483	No	No	No
Afu2g02950	52.6422	65.6598	50.6417	131.631	0.0146443	4253.8	3.79424e-163	No	No	No
Afu2g02960	69	56.0038	69.1614	88.6621	0.000293105	9365.32	7.86372e-15	No	No	No
Afu2g02970	9.75845	4.7611	9.30766	11.6406	2.82263e-05	6306.66	341.545	No	No	No
Afu2g02980	79.6013	28.5413	100.055	77.3678	3.82544e-102	5.026e-07	3471.32	No	No	No
Afu2g02990	750.46	268.653	1095.91	934.007	0	2.63675e-146	2.33413e-63	No	No	No
Afu2g03000	23.1029	28.1327	29.51	22.9183	1.57799	0.0206729	8375.99	No	No	No
Afu2g03010	123.495	106.708	176.717	188.519	3.1126	2.16823e-19	1.7209e-41	No	No	No
Afu2g03020	10.8965	5.69662	41.9286	102.604	0.000173286	2.17687e-75	0	No	No	Up
Afu2g03030	23.0781	37.2997	20.5195	54.152	1.38998e-125	0.00295006	0	No	No	No
Afu2g03040	527.597	1894.03	543.923	802.614	0	1029.09	2.74614e-182	No	No	No
Afu2g03050	7.56612	10.5228	10.9168	72.9029	7.08849	1.55874	0	No	No	Up
Afu2g03060	31.9552	43.2139	36.6033	44.0401	3.69477e-09	17.8727	3.45412e-16	No	No	No
Afu2g03070	60.033	51.3585	84.2865	37.5142	0.049052	5.46639e-25	1.45428e-51	No	No	No
Afu2g03080	23.7279	13.5397	21.1459	8.23208	1.42549e-44	8.61967	4.33887e-207	No	No	No
Afu2g03090	51.6802	78.8427	52.3509	23.5275	1.29504e-61	6291.01	8.37704e-191	No	No	No
Afu2g03100	17.5134	16.7814	22.6123	27.8677	6549.78	39.4679	7.24465e-07	No	No	No
Afu2g03110	94.667	46.9282	128.151	110.811	8.73332e-120	2.19461e-34	6.85645e-11	No	No	No
Afu2g03120	293.717	336.279	328.644	468.627	4.8257e-13	4.69152e-08	2.2211e-296	No	No	No
Afu2g03130	22.7728	34.7973	19.3195	2.88867	5.12008e-07	267.83	2.4304e-117	No	No	Down
Afu2g03140	95.6182	97.6049	119.491	71.4382	6155.17	0.000303477	4.30378e-11	No	No	No
Afu2g03150	13.9884	7.46692	20.2598	20.1696	1.34667e-22	1.51927e-11	9.62328e-17	No	No	No
Afu2g03155	87.7721	111.683	116.694	85.9928	0.0066854	3.01524e-05	6227.89	No	No	No
Afu2g03160	31.8071	32.8724	34.1118	27.0859	6446.88	3355.36	109.107	No	No	No
Afu2g03170	16.8964	15.3363	16.4652	26.1559	492.953	5961.37	1.59258e-28	No	No	No
Afu2g03180	1.81056	0.707277	3.00926	4.38335	0.319197	15.8452	1.75046e-08	No	No	No
Afu2g03190	124.506	114.543	123.829	118.484	2286.62	9248.13	3754.11	No	No	No
Afu2g03200	11.0448	27.5147	14.2605	12.3041	1.82955e-67	0.206918	375.879	No	No	No
Afu2g03210	95.913	132.557	109.868	132.461	4.60263e-11	16.8393	1.66173e-16	No	No	No
Afu2g03220	195.792	194.257	231.553	228.271	7267.64	9.40048e-10	4.21729e-12	No	No	No
Afu2g03230	119.081	181.859	114.163	34.5128	4.6759e-84	755.475	0	No	No	No
Afu2g03240	2.45283	0.654652	3.05681	0.731241	7.76072	4276.31	0.257697	No	No	No
Afu2g03250	4.63021	1.3422	5.02175	4.87036	0.0416484	6839.92	7915.77	No	No	No
Afu2g03260	124.014	197.235	148.348	129.546	1.22166e-29	0.138745	2161.28	No	No	No
Afu2g03270	51.5358	17.4574	53.13	31.185	3.06765e-132	3591.46	9.50927e-56	No	No	No
Afu2g03280	31.1378	63.8692	43.5511	63.5932	9.15839e-21	0.125902	8.27915e-29	No	No	No
Afu2g03290	568.243	798.775	548.826	912.519	3.88457e-120	271.215	0	No	No	No
Afu2g03300	739.323	723.577	950.892	919.382	4650.26	1.91993e-15	2.14498e-16	No	No	No
Afu2g03310	50.666	65.5024	51.6653	85.2464	1.04134e-13	5346.29	2.23638e-101	No	No	No
Afu2g03320	136.542	53.4479	136.016	113.592	6.703e-254	8421.84	1.37099e-18	No	No	No
Afu2g03330	73.3021	86.7342	71.0077	110.825	0.0881126	4171.55	9.13062e-39	No	No	No
Afu2g03340	54.9558	198.471	57.2853	146.851	5.48276e-193	4770.88	7.88673e-131	No	No	No
Afu2g03350	15.7314	12.427	15.1024	19.6545	0.00672149	3681.68	4.63591e-06	No	No	No
Afu2g03360	64.5728	24.1669	60.5827	79.3617	2.04194e-231	81.6813	1.35381e-23	No	No	No
Afu2g03370	11.4977	16.9642	16.9895	21.8286	8.58256e-05	7.99812e-05	1.99576e-28	No	No	No
Afu2g03380	413.036	1833.11	360.621	958.798	0	0.00537379	0	Up	No	No
Afu2g03390	99.8233	90.1424	122.064	84.4269	0.145306	4.49634e-16	1.82978e-13	No	No	No
Afu2g03400	166	152.44	223.206	181.55	10.3801	1.39164e-31	0.170045	No	No	No
Afu2g03410	63.475	87.6485	87.7528	65.8966	1.22943e-10	1.08414e-10	3205.61	No	No	No
Afu2g03420	56.012	105.068	60.6628	115.148	3.28601e-91	219.325	3.41199e-173	No	No	No
Afu2g03430	8.43122	9.9184	8.8984	12.7292	322.236	4994.13	9.44151e-08	No	No	No
Afu2g03440	23.5209	16.2112	20.0435	18.0973	1.12983e-13	1.07384	4.43342e-10	No	No	No
Afu2g03450	28.0025	17.968	32.1218	48.4941	4.7084e-18	6.16534	2.5288e-67	No	No	No
Afu2g03460	51.7787	40.6865	56.0263	48.5549	1.51122e-12	36.3184	54.1668	No	No	No
Afu2g03470	95.381	46.8366	123.686	58.7047	1.96775e-30	0.000186661	2.31285e-23	No	No	No
Afu2g03480	11.9423	16.0003	11.6008	15.7552	0.00112055	6199.4	2.71784e-05	No	No	No
Afu2g03490	75.0886	102.88	66.7889	124.161	2.02192e-31	0.316594	2.21948e-128	No	No	No
Afu2g03500	14.2774	16.5667	21.2307	9.97453	195.546	3.87902e-07	9.34142e-06	No	No	No
Afu2g03510	10.6015	56.5913	7.85706	45.1797	4.30839e-213	5.10541	2.13792e-187	Up	No	Up
Afu2g03520	26.1352	20.4462	17.8109	12.1265	0.0693923	1.4463e-07	7.96999e-50	No	No	No
Afu2g03540	22.901	18.609	17.2893	12.5141	0.513146	0.000781758	2.97658e-36	No	No	No
Afu2g03560	119.197	125.658	115.411	114.24	3.81032	334.611	7.5076	No	No	No
Afu2g03570	44.6129	75.4367	55.6408	44.6199	5.93415e-41	0.000400282	9784	No	No	No
Afu2g03580	99.144	217.117	116.018	165.46	1.28684e-274	8.39093e-06	5.08443e-142	No	No	No
Afu2g03590	804.999	2795.61	917.7	1572.78	0	1.95782e-05	0	No	No	No
Afu2g03600	29.6478	18.3746	30.15	14.1791	4.76468e-11	7490.62	1.60289e-41	No	No	No
Afu2g03610	233.881	921.415	230.773	201.419	0	4220.89	2.80758e-21	No	No	No
Afu2g03620	15.9997	65.6601	16.7477	15.4301	8.43517e-161	5303.71	5290.43	Up	No	No
Afu2g03630	155.249	141.639	164.187	108.763	317.022	1773.48	9.28149e-18	No	No	No
Afu2g03640	32.3333	8.86528	32.8299	29.7578	5.5703e-305	5413.34	0.974497	No	No	No
Afu2g03650	130.584	93.1578	166.454	192.839	7.19643e-40	2.48521e-26	5.03539e-109	No	No	No
Afu2g03670	27.839	20.3555	29.3024	22.9795	2.96636	5160.71	55.0884	No	No	No
Afu2g03680	46.9633	37.1808	40.0236	30.6631	0.000902906	1.99614	2.26764e-26	No	No	No
Afu2g03690	16.1546	2.1425	11.9483	4.51427	1.71613e-44	11.5488	4.76195e-41	Down	No	No
Afu2g03700	156.601	71.14	113.295	83.4637	0	3.64505e-93	0	No	No	No
Afu2g03710	37.0391	37.5111	43.0911	54.1554	6850.59	0.0120313	8.82221e-49	No	No	No
Afu2g03720	1040.79	1250.07	1589.24	2068.16	3.59314e-45	9.31284e-280	0	No	No	No
Afu2g03730	2017.9	900.07	2347.2	2887.84	0	1.22788e-74	0	No	No	No
Afu2g03740	18.9591	48.3569	33.8397	33.4641	4.35728e-40	3.43221e-11	1.04199e-15	No	No	No
Afu2g03750	10.4916	9.4519	11.3819	11.7915	844.117	1573.79	147.007	No	No	No
Afu2g03760	109.56	214.289	106.355	98.4266	1.38074e-115	3837.94	1.83917	No	No	No
[truncated: 7,785 more rows]
